# Supplementary material for: How human runners regulate footsteps on uneven terrain
Source: eLife journal article supplement (doi:10.7554/elife.67177), 2023-02-22
Supplement: supp [file elife-67177-supp-v1.zip]

Archive with 21 entries (21 files):
- elife_poa_e67177_Figure_3_figure_supplement_1.pdf
- elife_poa_e67177_Figure_5_figure_supplement_1.pdf
- elife_poa_e67177_Figure_5_figure_supplement_2.pdf
- elife_poa_e67177_Figure_5_figure_supplement_3.pdf
- elife_poa_e67177_Figure_6_figure_supplement_1.pdf
- elife_poa_e67177_Figure_7_figure_supplement_1.pdf
- elife_poa_e67177_Figure_7_figure_supplement_2.pdf
- elife_poa_e67177_Figure_1_source_data_1.csv
- elife_poa_e67177_Figure_3_source_data_1.pdf
- elife_poa_e67177_Figure_5_source_data_1.csv
- elife_poa_e67177_Figure_5_source_data_2.csv
- elife_poa_e67177_Figure_5_source_data_3.csv
- elife_poa_e67177_Figure_5_source_data_4.csv
- elife_poa_e67177_Figure_5_source_data_5.csv
- elife_poa_e67177_Figure_5_source_data_6.csv
- elife_poa_e67177_Figure_6_source_data_1.csv
- elife_poa_e67177_Figure_6_source_data_2.csv
- elife_poa_e67177_Figure_7_source_data_1.csv
- elife_poa_e67177_Table_1_source_data_1.csv
- elife_poa_e67177_Table_2_source_data_1.csv
- elife_poa_e67177_Transparent_Reporting_File.docx
