# Supplementary material for: How human runners regulate footsteps on uneven terrain
Source: eLife journal article supplement (doi:10.7554/elife.67177), 2023-02-22
Supplement: supp [file elife-67177-supp-v1.zip › elife_poa_e67177_Figure_1_source_data_1.csv]

subject	leg_length_greater_trochanter_to_lateral_malleolus_units_cm	mass_kg
1	93	58.066
2	89	81.898
3	90	66.961
4	94	66.718
5	93	64.276
6	87	66.236
7	90	55.773
8	83	55.477
9	86	71.346
