# Supplementary material for: How human runners regulate footsteps on uneven terrain
Source: eLife journal article supplement (doi:10.7554/elife.67177), 2023-02-22
Supplement: supp [file elife-67177-supp-v1.zip › elife_poa_e67177_Figure_3_figure_supplement_1.pdf]

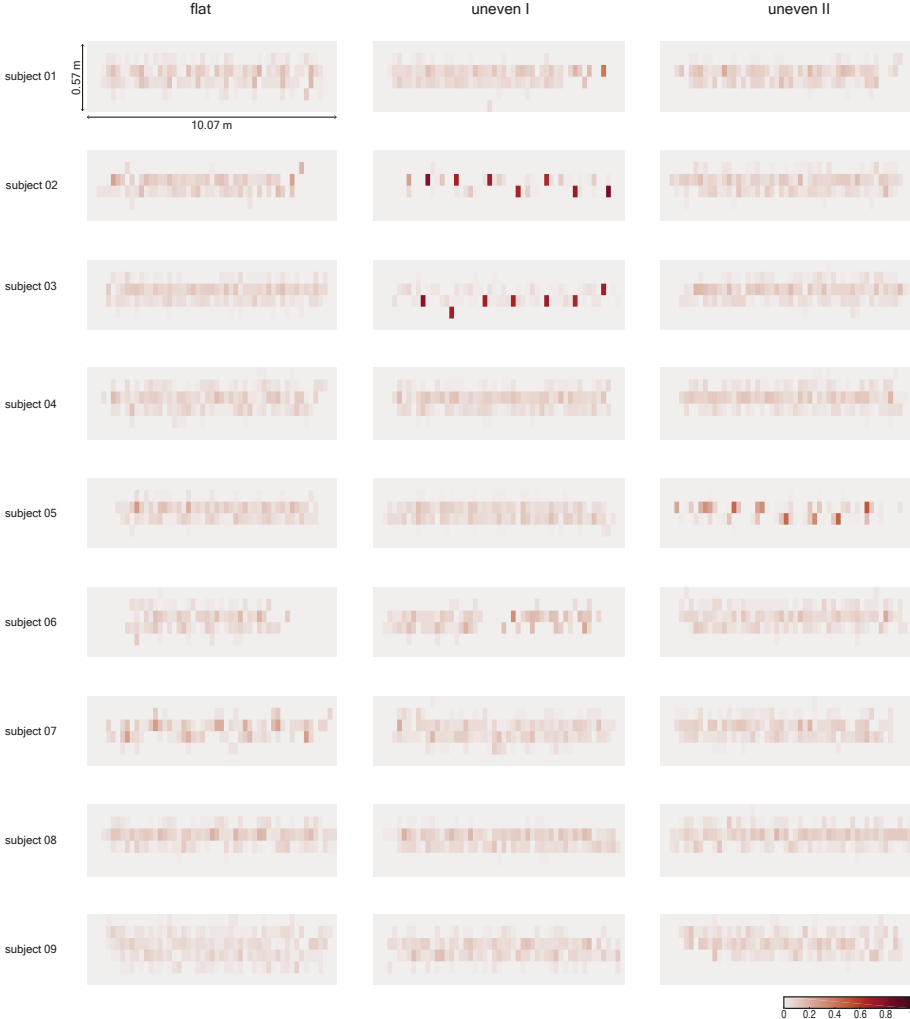

**Figure 3—figure supplement 1. Subject-wise foot placement patterns.** Heatmaps of the foot placement index for all subjects on each terrain. Each cell has an area of 190 mm  $\times$  95 mm, with the longer side of the rectangle along the length of the track. Colour bar at the bottom right of the figure shows the value of  $p_{i,j}$ .
