# Supplementary material for: How human runners regulate footsteps on uneven terrain
Source: eLife journal article supplement (doi:10.7554/elife.67177), 2023-02-22
Supplement: supp [file elife-67177-supp-v1.zip › elife_poa_e67177_Figure_3_source_data_1.pdf]

**Figure 3—source data** 1. Footstep counts for each subject on all terrain.

| subject | flat | uneven I | uneven II |
|---------|------|----------|-----------|
| 1       | 363  | 321      | 448       |
| 2       | 228  | 78       | 473       |
| 3       | 473  | 131      | 436       |
| 4       | 373  | 471      | 519       |
| 5       | 366  | 557      | 109       |
| 6       | 224  | 160      | 327       |
| 7       | 218  | 398      | 442       |
| 8       | 503  | 489      | 479       |
| 9       | 477  | 390      | 392       |
