# Supplementary material for: How human runners regulate footsteps on uneven terrain
Source: eLife journal article supplement (doi:10.7554/elife.67177), 2023-02-22
Supplement: supp [file elife-67177-supp-v1.zip › elife_poa_e67177_Figure_5_figure_supplement_1.pdf]

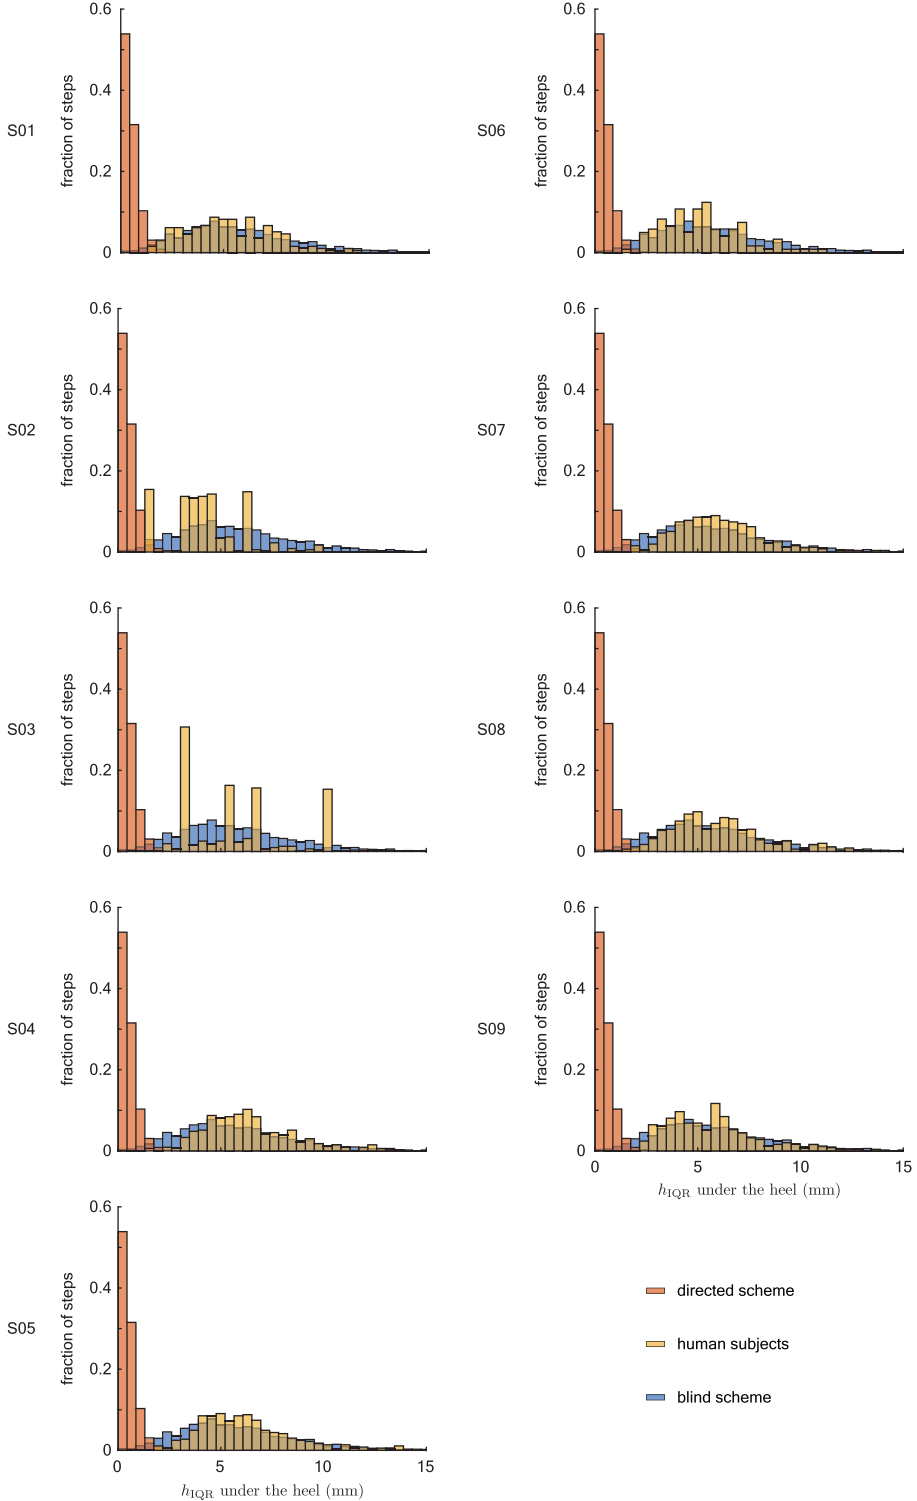

**Figure 5—figure supplement 1. Subject-wise foot placement analysis on uneven I.** Histograms of the interquartile range of heights (IQR) at the footstep locations for the directed sampling scheme (red), each subject from the experiments (yellow), and the blind sampling scheme (blue).
