# Supplementary material for: How human runners regulate footsteps on uneven terrain
Source: eLife journal article supplement (doi:10.7554/elife.67177), 2023-02-22
Supplement: supp [file elife-67177-supp-v1.zip › elife_poa_e67177_Figure_5_figure_supplement_3.pdf]

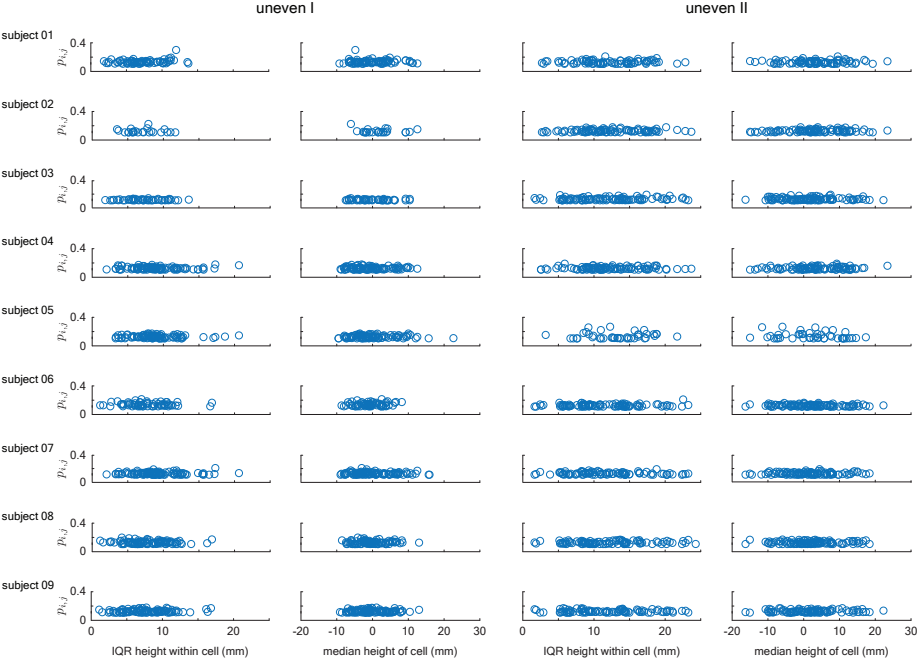

**Fig 5—figure supplement 3. Subject-wise foot placement analysis.** Foot placement index  $p_{i,j}$  plotted against the median height of the terrain cell and the interquartile range of heights within the terrain cell at landing for all recorded steps on uneven I and uneven II.
