# Supplementary material for: How human runners regulate footsteps on uneven terrain
Source: eLife journal article supplement (doi:10.7554/elife.67177), 2023-02-22
Supplement: supp [file elife-67177-supp-v1.zip › elife_poa_e67177_Figure_5_source_data_1.csv]

Directed scheme - Uneven I
inter_quartile_range_of_terrain_height_units_mm
0.42499
0.29087
0.27381
0.63344
0.22182
0.30957
0.66113
0.58546
0.12744
1.5939
0.92572
0.32768
0.30482
0.32261
0.38747
0.66945
0.069737
0.9311
0.45244
0.31181
0.18494
0.30974
0.23876
0.70991
0.69793
0.26982
0.90146
0.5707
0.074812
0.53588
0.46534
0.64487
1.2227
0.035717
0.52729
0.44052
0.35567
0.41713
0.05844
0.20834
0.14099
0.60941
0.12445
0.43424
1.1785
1.251
0.14102
0.54548
1.7432
0.35614
0.47509
0.60228
0.2079
0.23088
0.3684
0.75694
0.10555
1.3616
0.68244
0.26152
1.3042
0.92357
0.52842
1.0918
0.1155
0.47771
0.25347
0.38794
0.79231
0.17805
0.081618
0.088265
0.2132
0.41137
0.15492
0.481
0.24616
0.6057
1.9824
0.51687
1.6464
0.30455
0.23331
0.32805
0.3096
0.3859
0.23297
0.19085
0.21807
0.45312
0.77372
0.12828
1.3116
0.74791
0.18531
0.20928
0.032588
0.7351
0.28354
0.39181
1.092
0.13645
0.16151
0.78675
0.193
0.2089
0.21514
0.19894
0.29158
1.7719
0.13696
0.39916
1.5964
0.40198
0.47104
0.36236
0.18296
0.43441
0.20368
0.90091
0.59631
0.61079
0.6775
0.2772
0.22194
0.44952
0.57548
1.8131
0.11342
0.35348
0.37735
0.40703
0.73972
0.065161
0.11993
0.394
0.20062
0.27943
0.23638
0.21042
0.44336
1.1084
0.45421
1.4246
1.2315
0.25606
0.19263
0.35969
0.14954
0.48271
0.20407
0.36406
0.74914
0.90085
0.61755
0.84177
0.099235
0.32119
0.20411
0.32149
0.21218
0.63618
0.58201
0.82302
0.20265
0.20671
0.28853
0.3401
0.24048
0.11842
0.45753
0.45479
0.88161
0.25904
0.46717
1.3483
0.30411
0.36684
0.32576
0.21663
0.089168
0.62942
1.4833
0.5603
0.84353
0.77877
0.29104
0.47943
0.8292
0.91889
0.36629
0.019666
0.63669
0.38976
0.22261
0.75829
0.22529
0.13637
0.88831
0.60202
0.39995
0.19436
0.69733
1.6866
1.3846
0.42754
1.1396
0.31498
0.78999
0.11399
0.11394
0.18481
0.46232
0.20933
0.51204
0.69012
0.26965
1.3147
0.38346
0.68448
0.56385
1.9719
0.112
0.48406
0.26247
0.38384
1.0766
0.27746
0.22188
1.0901
0.96489
0.88927
0.1291
0.30622
0.64126
2.3349
0.41856
1.2575
0.29641
0.80531
0.0674
0.15795
0.26144
0.71295
1.0346
1.5429
0.24438
1.0979
0.1268
0.54348
0.4311
0.35057
0.13322
0.053489
0.063937
0.44968
0.41793
1.017
0.030678
0.098829
0.60497
0.10977
0.17566
0.16234
0.25082
0.071156
0.21166
0.2563
0.26359
1.1258
0.55953
0.54247
0.68664
0.11666
0.19867
0.4524
0.16209
0.31438
0.74844
0.47416
0.44199
0.92629
0.61039
0.70265
1.0071
0.029505
0.5667
0.32618
0.46244
0.89025
0.29997
0.17691
0.059173
0.24848
0.64555
0.099847
0.19191
0.98676
0.34678
0.10785
0.34275
0.54122
0.27901
0.50971
0.048259
0.1223
0.38433
0.22513
0.24329
0.20473
0.72418
0.78446
0.42493
0.28419
0.56744
0.44272
1.0327
0.033224
0.14763
0.4746
0.434
0.95387
0.12036
0.16751
0.54297
0.18003
0.087261
0.6117
0.25013
0.42299
0.49028
0.57639
0.50344
1.5279
0.5292
0.43532
1.5723
0.14201
0.65169
2.0827
1.0405
0.86253
1.3645
1.1936
0.31441
0.53663
0.88291
0.17971
1.0473
0.02965
0.41183
0.32453
0.26019
0.27847
0.22938
0.17019
0.89743
0.18534
0.11137
0.69065
0.14129
0.43159
0.30482
0.26467
1.2361
0.49641
0.66823
0.57332
0.34928
0.22298
0.32178
0.38647
0.58482
0.85775
0.20299
0.17994
0.30145
0.31664
0.87588
1.0743
0.98847
0.079074
0.23094
0.2258
0.28923
0.93717
0.068852
0.22524
0.5347
0.21127
0.38101
0.10971
0.55008
0.69219
0.070369
0.32488
1.3735
0.51132
0.252
0.27197
0.20954
0.27873
0.66952
1.2245
0.93674
0.30635
1.0147
0.1284
0.10404
0.65753
0.39373
0.478
0.41937
0.053953
0.51498
0.5212
0.2373
0.9116
0.26052
0.21109
0.21465
0.28764
0.16567
0.2186
0.39544
0.10113
1.445
2.8058
0.13912
0.47685
0.43472
0.14531
0.37669
0.36972
0.13273
0.65554
1.7679
1.044
1.1613
1.2632
0.84664
0.32293
0.36933
0.52837
0.23729
0.56761
0.033584
0.53466
0.34526
0.22904
0.69809
0.20997
0.11211
0.51287
0.23884
0.12812
0.25396
0.23594
1.562
0.58636
0.35956
0.2833
0.31387
0.1783
1.4271
0.21747
0.31573
0.45644
0.18596
0.73276
0.037933
0.21447
0.55956
0.20154
0.18498
0.15536
0.67023
0.91195
0.059871
1.0289
0.59245
0.28947
0.97714
0.23155
0.30611
0.93449
0.98056
0.84441
0.095282
0.34562
0.50514
0.41987
0.13101
0.31876
0.8089
0.12108
0.10094
0.18236
0.68111
0.073138
0.77055
0.0062084
0.27795
0.16589
0.23439
0.87421
0.32898
0.69212
0.23216
0.11661
0.27434
0.12263
0.37693
0.20963
0.26166
0.87
0.35895
0.1661
0.17728
0.17493
0.24226
0.10814
0.31392
1.5225
0.44603
1.4736
0.45583
0.16216
0.7438
0.37831
0.12105
0.26359
1.9606
1.1233
0.70037
0.69704
0.80115
0.35764
1.2536
0.40666
0.098093
1.088
0.21322
0.63303
0.58624
0.50357
0.2744
0.24226
0.2241
0.96337
0.17186
0.31095
0.66999
0.14009
0.88237
0.38512
0.4807
0.03861
0.41855
1.5258
0.28557
0.25018
0.58873
0.6855
0.38891
0.65307
0.60157
1.2703
0.28817
0.20445
0.30509
0.6281
1.4596
0.11351
0.19049
0.28725
0.27031
0.96335
0.24636
0.12764
0.47112
1.2565
0.60597
0.45349
0.21259
0.41297
0.24576
0.1608
0.62951
0.8681
0.29846
0.089301
0.2012
0.16432
0.24524
0.17955
0.099695
0.51082
0.87483
0.27139
0.76824
0.4864
0.27944
1.0348
0.033678
0.18155
0.8923
0.5428
0.74189
0.26663
0.1613
0.62582
1.7603
0.36103
0.17901
0.29203
0.35319
0.92387
0.50557
0.44148
0.4408
0.32799
0.18767
0.23872
0.74458
0.10992
1.0837
0.99767
0.2936
1.2117
0.27042
0.23419
0.30925
0.62574
0.48322
0.33268
0.039787
0.61573
0.30531
0.1074
0.66523
0.30495
0.25971
0.89376
1.0062
0.40369
0.10921
0.72027
1.2821
0.072944
0.57389
1.6994
0.47697
0.48993
0.33746
0.71402
0.32154
2.2741
0.91386
0.63606
1.0007
1.0225
0.3559
0.19444
0.77186
0.69627
0.99476
0.21946
0.63757
0.54535
0.062636
0.87477
0.21708
0.23362
0.14343
0.9066
0.35256
0.14384
0.61749
0.4222
0.48558
0.38971
0.45215
0.60462
0.20443
0.1876
0.22983
0.23283
0.32021
0.90133
0.80409
0.47978
0.61133
0.49373
0.47384
0.15511
0.57469
0.14257
0.052483
0.44156
0.38954
0.24026
0.9765
0.2326
0.13658
0.18153
0.28376
0.046562
0.090155
0.089318
0.38253
0.50989
0.41293
0.56204
1.7212
0.45084
0.4633
0.62058
0.73184
0.60196
0.62331
0.80414
0.57353
1.336
1.1222
0.4071
1.4173
0.73384
0.45963
0.8644
0.039943
0.58052
0.39152
0.50937
0.93639
0.14814
0.1087
0.46998
0.14024
0.40212
0.21831
0.22583
0.57765
0.38453
2.5069
0.26439
0.66519
0.26635
0.61286
0.27387
0.45308
0.37092
0.64006
0.26475
1.3177
0.095249
0.3111
0.33436
0.9286
0.49198
0.87251
0.032304
0.64178
0.33647
0.24138
1.021
0.35078
0.32313
0.40776
0.32387
0.24332
0.18244
0.2168
0.031192
0.2238
1.7544
0.12767
0.52096
0.42542
0.23401
0.017114
1.1513
0.84032
0.20996
0.54701
0.28287
0.29455
0.87556
0.8428
0.322
0.98924
0.65291
0.52024
1.5507
0.074962
0.4743
0.33052
0.42139
0.34966
0.21523
0.18589
0.18946
0.82646
0.10618
0.18145
0.35522
1.1998
0.6879
0.94548
0.11628
0.74877
0.11776
0.75048
1.264
0.35935
0.79419
0.27016
0.7109
0.55589
0.36041
0.16134
0.22991
1.6295
0.46362
0.16977
0.78839
0.66896
0.21948
0.10998
0.89518
1.0474
0.30623
0.54969
0.27846
0.20812
0.51855
0.19072
0.075792
0.18956
0.11697
0.85299
1.777
0.20536
0.076529
0.7368
0.92319
0.30673
0.080702
0.27935
0.29874
0.61315
0.72475
0.90988
1.4775
0.58329
0.22953
0.11307
0.54713
0.4794
0.19711
0.071396
0.51681
0.60824
0.30262
0.68084
0.23339
0.4829
0.67453
0.1849
0.17626
0.29015
0.29417
0.12532
1.9894
0.17647
0.10076
0.52455
0.30344
0.33231
0.076999
0.41988
0.46242
0.29797
0.8573
0.34606
0.31117
0.14837
0.13797
1.1716
0.43369
0.5757
1.519
0.036248
0.10396
0.34067
0.20505
0.37167
0.26017
0.1693
0.63548
0.29226
0.21826
0.82511
1.322
1.4413
0.13235
0.16661
1.382
0.65535
0.21927
0.090843
0.21082
0.34066
0.049678
0.65399
0.14847
0.64327
0.46625
1.1185
0.058643
0.45747
0.36601
0.50283
1.9556
0.08861
0.52556
0.59384
0.70266
0.75821
0.086193
0.030958
0.53771
0.14371
0.36823
0.27276
0.51578
0.15344
1.0173
2.6011
0.12464
0.64295
0.12643
0.8078
0.6667
0.23387
1.1155
0.89884
0.18604
0.52296
0.44027
0.8311
1.5304
0.29029
0.4834
0.35367
0.22311
1.6261
0.16192
0.56797
0.076434
0.68753
0.25592
0.43323
0.17695
0.64277
0.3026
0.16838
0.4182
0.092828
0.27905
0.13093
0.46773
0.73908
0.12851
0.077513
0.39207
0.27444
0.41531
0.5487
0.64317
1.4787
0.90525
0.30989
0.87767
0.72946
0.90353
1.2201
0.040914
0.061332
0.38697
0.10826
0.41637
0.10231
0.26004
0.53652
0.21947
0.09171
0.75147
0.70891
0.76608
0.36864
0.48126
1.329
0.40261
0.4478
0.36324
0.46861
0.22104
0.36185
1.0591
1.3815
0.32316
0.21286
0.21002
0.43298
0.36941
0.59057
0.029823
0.48073
0.32407
0.35518
0.33411
0.24359
0.41714
0.6496
0.26989
0.34081
0.44691
1.0596
1.5478
0.94324
0.31161
0.5639
1.6735
0.47814
0.18081
0.7212
0.75822
0.47063
0.30734
0.16133
0.16343
0.12283
1.3285
0.37759
0.29724
1.3602
0.94475
0.49153
0.089726
0.030682
0.64947
0.36227
0.34767
0.73595
0.27223
0.22666
0.25128
0.78231
0.05342
0.22172
0.42729
2.0296
0.2912
0.50813
1.1708
0.26175
0.80735
0.30258
0.36996
0.27434
0.72042
0.11129
0.64994
0.76084
0.76037
0.3586
0.429
0.33815
0.5732
1.9484
0.093405
0.52195
0.35584
0.32042
0.75123
0.1991
0.061516
0.12805
0.28732
0.20626
0.58273
0.25208
1.3794
0.068011
0.52643
1.5515
0.31158
0.57187
0.087852
0.29319
0.2453
0.17102
0.72697
1.3543
1.3383
1.0635
0.59809
0.28608
0.48875
0.53377
0.34257
0.045236
0.25824
0.4429
0.32018
0.92841
0.20512
0.3299
0.33212
0.23078
0.42365
0.21045
0.25198
0.79685
1.932
0.41657
0.45039
1.3102
0.2626
0.076436
0.71885
0.48624
0.48603
0.28628
0.18007
0.28458
0.68817
0.83744
0.37158
0.74317
0.36055
0.16132
0.40573
0.13463
0.85328
0.12368
0.5099
0.32381
0.31467
0.20168
0.37915
0.37191
0.11698
0.40053
0.79684
1.8995
0.74922
0.17288
0.76608
0.057678
0.21946
0.97469
0.51672
0.45709
0.69449
0.026258
1.1939
0.57007
1.1194
0.65123
0.25009
0.33626
0.18632
0.57582
0.090895
0.032275
0.13554
0.43117
0.046321
1.0917
0.053646
0.10159
0.33391
0.12601
0.34804
0.21455
0.79986
1.1044
1.1432
0.49244
1.295
0.32299
0.56061
0.51581
0.44248
0.49613
0.60051
0.68162
0.62042
0.21495
0.40228
0.13979
0.39076
0.089826
0.54006
1.9418
0.11433
0.49742
0.36568
0.3661
0.65306
0.2003
0.17021
0.21226
0.18326
0.49767
0.2496
0.59739
0.16537
0.10294
0.52698
1.4379
0.38118
0.45054
0.12898
0.61319
0.35931
2.2247
0.99248
0.67496
1.0555
0.88335
0.20991
0.64428
0.68817
0.1569
0.68668
0.026144
0.14494
0.32624
0.35061
0.6483
0.29302
0.097561
0.14702
0.64974
0.79709
0.10041
0.73778
0.32763
0.22481
0.43236
0.43079
0.97508
0.16278
0.063349
0.43881
0.32694
0.16654
0.44102
0.2618
0.80719
1.1947
0.84362
0.29163
0.37202
0.76702
0.26284
0.057541
0.26344
0.22582
1.0072
0.49942
0.20894
1.7154
0.62095
0.96878
1.1054
0.20188
0.85826
0.66924
0.22547
1.3244
0.47095
1.0598
0.27523
0.68218
0.15246
0.43748
0.39553
0.154
0.64373
0.4641
0.29735
0.5542
0.030024
0.31459
0.18903
0.22129
0.30391
0.059112
0.31413
0.30363
0.17298
0.89019
0.18709
0.16252
0.19158
0.10931
0.7858
0.20245
0.86705
0.95186
0.93276
0.64711
0.13081
0.82096
0.44377
0.13819
0.27806
0.47356
0.84189
0.55937
0.47801
0.18236
0.23813
0.7674
0.82648
0.27268
0.34849
0.36149
0.44353
0.7257
0.040108
0.43301
0.44336
0.23325
0.85323
0.25276
0.045715
0.84852
0.7755
0.083396
0.14003
0.42623
0.51543
0.57596
0.51827
1.2817
0.31513
0.31562
0.4418
0.33313
0.40552
0.30398
0.24964
0.094379
0.388
0.40208
0.33534
1.3516
0.61012
0.48806
1.6144
0.038248
0.31741
0.40252
0.14538
0.65247
0.25
0.19763
0.37776
0.50375
0.47641
0.72694
0.34061
1.2884
0.65801
0.10646
0.12185
0.77883
0.13884
0.46711
0.16897
0.49235
0.22291
0.68938
0.083665
0.55477
0.89065
0.10793
1.3408
0.388
0.69073
1.2707
0.1179
0.26522
0.036299
1.1276
0.44002
0.21484
0.10697
0.43299
0.27242
0.25105
0.21741
0.50494
0.46276
0.55203
0.14736
0.42536
0.90964
0.19656
0.13556
0.31775
0.23543
0.71016
0.63572
1.4882
0.80724
1.085
0.44389
0.29997
0.31405
0.040657
1.006
0.12533
0.057522
0.2543
0.34994
0.38269
0.47179
0.066102
0.34129
0.18725
0.62148
0.087523
0.70251
0.26903
2.3637
0.84928
0.46398
1.0359
0.42214
0.58217
0.1478
0.48446
0.34286
1.2917
1.0553
0.91956
1.0338
1.2134
0.35415
1.0791
0.62974
0.41321
0.69495
0.032034
0.66019
0.26128
0.48712
0.94297
0.22262
0.019028
0.43586
0.2273
0.92997
0.1816
0.55072
0.94726
1.009
0.134
0.46506
1.455
0.50472
0.57398
0.01786
0.77922
0.24458
0.26908
0.70339
0.29055
0.83922
0.94484
0.24277
0.77052
0.76988
0.69417
1.0804
0.033218
0.61463
0.56717
0.30817
0.49837
0.29518
0.3087
0.13234
0.66363
0.16178
0.25015
0.38326
0.57929
2.0386
0.43832
1.3042
0.30318
0.84108
0.615
0.43583
0.49754
0.53473
0.22915
0.26537
0.79969
0.69191
0.71839
0.45473
0.71097
0.22895
0.21178
0.11185
0.54341
0.98645
0.77114
0.73521
0.26406
0.092085
0.95725
0.28561
0.40177
0.18901
0.61853
1.1356
1.0103
0.47434
1.0868
0.27897
0.51791
0.73617
0.37409
0.4971
0.30602
0.69073
0.32714
0.19478
0.52048
0.078543
0.2879
0.4073
0.59125
0.28478
0.049125
0.070048
0.45426
0.13867
0.88215
0.33624
0.19419
0.17455
0.082699
0.64953
0.89981
0.05739
0.34335
0.56359
0.11513
0.61376
0.13996
0.22132
0.57497
0.46298
0.29892
0.38568
0.069893
0.1575
0.26422
0.86448
1.0845
0.1268
0.44046
0.4817
0.3689
0.46652
0.034415
0.66846
0.31203
0.48278
1.0883
0.25047
0.26987
0.68819
0.14767
0.080536
0.28844
0.087622
0.21537
0.41546
1.2686
0.50267
1.2302
0.25395
0.19253
0.1271
0.2057
0.087008
0.50133
0.21242
0.67923
0.52496
0.957
1.2091
0.39621
0.492
0.50747
0.95949
0.034788
0.69287
0.34734
0.16734
0.55457
0.24638
0.46138
0.43925
0.99393
0.36045
0.12837
0.51491
0.23377
0.55254
0.4881
1.2733
0.33598
0.26226
0.76992
0.46339
0.42172
0.70404
0.36135
0.7238
0.34422
1.3737
0.99454
0.52864
0.33132
0.69077
0.64825
0.026448
0.61808
0.1589
0.12324
0.73386
0.093011
0.188
0.20689
0.23748
0.051659
0.11278
0.28151
1.9319
0.22291
0.46872
0.51706
0.41852
0.082149
0.70644
0.45457
0.30098
0.57229
0.4502
0.42466
0.19374
1.1722
0.16907
0.15708
0.36908
0.62536
0.25203
0.17085
0.73224
0.75562
0.29638
0.35448
0.23364
1.0423
0.35989
0.2499
0.21479
0.063828
1.0736
1.0236
1.0292
0.93095
0.30472
1.4938
0.37326
0.81274
0.72343
0.5856
0.39815
0.62521
0.27201
0.53648
0.75036
1.037
0.91059
0.84802
0.41723
1.0662
0.61225
0.037402
0.61099
0.33954
0.37114
0.48279
0.13831
0.15077
0.88015
0.55862
0.6274
0.18375
0.29452
0.62575
0.4544
0.54134
1.0183
0.29427
0.19311
0.54097
0.22424
0.20238
0.22426
0.69355
0.11024
0.32499
0.10295
0.10366
0.78494
0.34401
0.5054
0.63539
0.036613
0.69547
0.51047
0.2353
0.52392
0.27554
0.14501
0.73962
0.54413
0.72572
0.24377
0.91541
0.84348
0.082778
0.41189
0.57572
0.70644
0.1674
0.674
0.38621
0.47013
0.53643
0.13028
0.2705
1.2829
1.1758
0.31806
0.63395
0.72576
0.76055
1.6939
0.11409
0.335
0.065365
0.80324
0.37155
0.14542
0.14711
0.62166
0.26392
0.6121
0.1713
0.91189
1.0876
0.67223
0.1839
0.40401
1.4986
0.44261
0.22761
0.081072
0.80813
0.64668
0.49111
0.18791
1.0539
0.76809
0.89242
0.18393
0.82751
0.51816
0.56985
1.8704
0.095706
0.27294
0.29923
0.17102
0.8066
0.33975
0.1313
0.77746
0.59135
0.5717
0.48829
0.30886
1.7174
2.0338
0.41081
1.5786
0.46592
0.43413
0.4693
0.20141
0.69478
0.078474
0.82863
0.41956
0.50774
0.76478
0.075647
1.1404
0.12974
0.51743
0.72578
0.029466
0.35125
0.39753
0.38405
0.84253
0.24366
0.1174
0.17687
0.57222
0.32024
0.19837
0.27541
0.50527
0.071344
0.4853
1.2918
0.29431
0.20459
0.50006
0.60384
0.21322
0.71546
0.11929
0.57003
0.56461
1.0977
0.019598
0.57201
0.2231
0.27411
1.1266
0.037052
0.6881
0.37831
0.08222
0.83518
0.24144
0.44877
0.28942
0.85229
0.37487
0.21451
0.40109
0.21576
1.4911
0.4304
1.4956
0.30907
0.28454
0.74695
0.32511
0.30443
0.078103
0.51129
0.46775
0.63409
1.6166
0.19805
0.29224
0.50583
0.50901
0.84707
0.11684
0.32065
0.41759
0.57134
0.83229
0.20523
0.41717
1.082
0.88003
0.85142
0.27296
0.99192
0.96928
0.23376
0.11549
0.13338
0.60142
0.23929
0.25847
0.28825
0.9288
0.3925
0.49477
0.24868
0.31739
0.86481
0.12951
0.27477
0.86162
0.68646
0.53432
0.32556
0.033098
0.062688
0.36724
0.18214
0.41306
0.17764
0.17454
0.63049
0.23283
0.18333
0.51122
0.26505
1.9778
0.41626
0.56791
0.11753
1.0668
0.25575
0.33189
0.14938
0.28153
0.28944
0.13802
0.13588
0.80005
0.81872
0.29547
0.52942
0.55797
1.126
1.1442
0.015074
0.70525
0.43639
0.21898
0.60706
0.22728
0.38502
0.11771
0.59835
0.31493
0.13242
0.69853
1.4261
0.074275
0.083573
0.24053
0.2447
0.24218
0.20217
0.27806
0.56912
0.44364
0.4991
0.19278
0.35256
0.83679
0.69319
0.26799
0.79705
0.78276
0.83568
0.80883
0.027185
0.5212
0.37542
0.31217
1.1253
[truncated: 66,530 more rows]
