# Supplementary material for: How human runners regulate footsteps on uneven terrain
Source: eLife journal article supplement (doi:10.7554/elife.67177), 2023-02-22
Supplement: supp [file elife-67177-supp-v1.zip › elife_poa_e67177_Figure_5_source_data_2.csv]

Directed Scheme - Uneven II
inter_quartile_range_of_terrain_height_units_mm
0.30956
0.54053
0.2067
0.30586
0.54391
0.19662
0.42756
0.20862
1.349
0.80007
0.36934
0.46189
0.11994
0.58583
0.27877
1.0144
1.6655
1.3181
0.92618
0.27368
0.33515
1.5611
0.18763
0.5789
0.41528
0.082691
0.36151
0.88335
0.81937
1.1589
0.16892
0.084737
0.31437
1.7817
0.17614
1.6331
0.56835
0.56097
1.0321
0.43722
0.3006
0.088152
1.1074
0.61158
1.1109
0.86255
0.56053
0.61402
0.56958
1.398
0.50729
0.13605
0.88817
0.73586
1.3177
0.61345
1.522
0.39135
1.0167
1.1434
0.29782
0.36594
0.042223
0.39356
0.52131
0.13397
0.55091
0.59597
0.073594
1.5651
0.66037
0.1914
1.1772
0.44534
0.28117
0.16966
1.4148
0.78473
0.57973
0.3723
0.57144
0.43819
0.23623
1.8166
0.16519
1.2897
1.174
1.2411
0.85551
1.5583
0.11
0.27633
0.28952
1.0706
0.41463
0.057949
0.40509
0.39675
0.034002
0.70089
0.55682
0.53425
0.47855
1.9361
0.36226
1.3561
0.46025
0.19162
0.48979
0.20703
1.0126
0.64733
0.83053
0.98004
0.79797
0.5026
0.7741
0.16094
0.72649
1.5435
0.57305
0.63152
1.0428
0.7761
0.3367
0.48841
0.72596
1.7864
0.23329
0.90782
0.35129
0.3305
0.16041
0.82574
0.36879
1.4709
0.53131
1.9517
0.1591
0.26949
0.28001
0.78818
0.69308
0.091125
1.824
1.3676
0.70967
1.0185
1.2201
0.49833
0.11186
0.6136
0.39338
1.5437
0.86221
0.31757
1.3902
1.3067
0.16389
0.28816
0.64516
0.5538
0.26165
1.0124
0.69828
0.11863
0.28885
0.46121
0.46153
0.34828
0.099972
1.6904
0.57946
0.50596
0.34567
0.54704
0.20509
0.087227
1.8898
1.2662
1.1642
1.0207
1.2357
0.16173
0.42103
0.69522
0.43218
1.4753
1.1825
1.5136
0.51654
1.7369
0.2959
0.045895
1.362
0.41547
0.63369
1.3145
0.89343
0.41439
0.040722
0.79273
0.66547
1.6044
0.14807
1.4843
0.49195
0.32701
1.7124
0.52429
0.45401
0.25716
1.4439
0.71205
0.81306
1.5407
0.50136
0.02677
0.69432
0.42142
1.4913
0.67598
0.55424
1.3967
0.87398
0.38441
0.47141
0.88943
0.27615
0.27656
0.51032
0.23132
0.21981
0.3386
0.37426
0.63643
0.82647
0.31297
0.84633
0.36679
0.20601
0.2303
0.14125
0.083388
0.08608
0.37122
0.67288
0.43086
1.2136
0.55509
0.28966
0.3464
0.90304
1.2899
0.6631
0.70433
0.14115
1.9067
0.2276
0.21847
0.43499
0.26219
0.31216
1.3601
0.61634
0.27316
0.13861
0.65219
0.371
0.32698
1.2591
0.35046
0.29326
0.24556
0.41317
0.10263
0.16175
1.1805
0.97111
0.59641
1.111
1.2927
0.39907
0.33993
0.34481
0.59907
0.20409
0.42002
0.53565
0.1865
0.60063
0.89996
0.37793
0.6654
1.5386
0.25703
0.95426
0.75469
0.38443
0.18032
0.85228
0.23111
1.2398
0.51526
0.43776
0.33598
0.30707
0.15246
0.5152
0.44352
0.45262
0.6978
0.49957
1.0994
0.782
0.81991
0.58596
0.82583
0.44633
0.21675
1.2202
0.71149
0.48196
0.47946
0.69622
0.83488
0.41005
0.22953
1.9481
0.36513
0.4109
0.26922
0.89418
0.068841
0.53774
0.57844
0.40448
0.63123
0.32197
0.20893
0.30045
0.090146
0.72315
0.11306
0.034705
1.4613
0.2942
1.0674
1.0238
0.4782
0.5623
0.41862
0.3625
0.46917
1.5867
0.63015
0.48293
0.92482
0.21795
0.27435
0.47563
0.89102
0.82048
0.26837
0.55472
0.16408
0.53693
0.31548
0.70611
0.18864
0.91912
0.07131
1.4352
0.47792
0.16014
1.6018
0.13722
1.3195
0.23162
1.0841
0.48183
1.4679
0.87653
0.36011
0.45306
0.47071
0.25157
1.6028
1.2444
0.60098
0.31415
1.6776
0.13279
0.81102
0.68775
0.73181
0.30137
0.87885
0.67004
0.61981
0.068552
0.85933
0.25796
0.47468
0.86384
0.5295
0.41275
0.085123
0.30692
0.16547
0.48698
3.2975
1.0463
0.71219
1.4521
1.0868
0.16785
0.43952
0.62682
0.47207
1.6075
0.58526
0.37632
1.0602
0.91347
0.262
0.5344
0.38649
0.69147
0.37412
0.35467
0.66963
0.92099
0.090884
0.13719
0.35404
1.7888
0.55131
1.9147
0.2613
0.70949
0.37762
0.19492
0.4505
0.17199
1.1121
0.61479
0.50102
1.1097
0.85951
0.48698
0.59361
0.90238
0.57342
1.2018
0.94459
0.37184
1.3235
1.4477
0.11734
0.26757
0.36169
0.35377
0.26973
1.4067
0.76625
0.44314
0.18423
1.7135
0.052627
0.58322
0.34642
0.23689
0.74982
0.17807
0.60075
0.47735
0.24866
1.1568
0.3978
0.20447
1.148
0.67065
0.35424
0.4556
0.93687
0.42796
1.5815
0.88729
0.23638
1.1336
1.2226
0.38571
0.56857
1.2726
0.36892
0.30085
1.1634
0.82132
0.3188
0.085536
0.16681
0.79192
1.7598
0.49326
0.37236
0.17787
0.29494
0.23037
0.74062
0.41829
0.13173
1.8291
0.95072
0.77257
0.73117
0.67185
0.76916
0.88859
0.65828
0.58876
1.0942
0.80508
0.75101
0.68223
0.24584
0.97921
0.17863
0.45409
0.28757
0.8839
0.56287
1.7378
0.20673
0.86198
1.405
0.71542
0.51654
1.247
0.29609
1.1748
0.38684
0.85027
0.71864
1.7283
0.45093
0.27496
0.22914
1.8663
0.58508
0.49457
0.95827
1.4733
0.18607
1.1907
1.1857
0.69134
1.0189
0.88535
0.37715
0.57286
0.69446
1.6137
0.35222
0.4694
0.16945
0.75059
0.1013
0.48123
0.8007
0.68793
0.48557
1.2248
0.57373
0.43665
1.6844
0.082694
1.3073
0.2633
0.78233
0.42117
1.0378
1.1029
0.23729
0.23412
0.28084
0.32712
1.5111
0.8424
0.32905
1.3362
0.16212
0.86208
0.51943
1.0261
2.0053
0.33144
0.40753
0.061282
0.25985
0.41848
0.33189
0.16117
1.1174
0.18638
0.3969
0.55214
0.077537
1.3482
0.48861
0.47583
0.13091
1.5152
0.6753
0.40634
1.3798
0.93932
0.33241
0.27483
0.12899
0.094498
1.4695
0.85976
1.6969
1.4349
1.1316
0.092585
0.25754
0.53002
0.39602
0.53211
1.1433
0.84864
0.26555
0.060946
0.57901
1.361
1.1431
0.09987
1.4914
0.53046
0.73625
2.0396
0.63451
0.097403
0.064371
1.4021
0.74687
0.5921
0.72408
0.43816
0.74947
0.61105
1.0373
0.55746
1.4674
1.1978
0.26366
0.4311
1.8798
0.56179
0.27718
1.1404
0.78457
0.42274
0.83708
0.87704
0.43527
0.035744
0.73051
1.1692
1.6323
0.20975
0.80204
0.90827
0.46927
0.45052
0.41511
1.1747
0.36729
0.72134
0.62368
0.45863
0.78659
0.27537
0.15495
1.0383
0.41533
0.77505
1.0921
0.62113
1.0911
1.3611
0.12145
0.080981
1.0131
0.53004
0.18332
0.40724
0.52086
0.55619
0.13642
0.82893
0.63529
0.57665
0.80171
0.22775
0.24976
0.40162
0.62477
0.12806
0.037333
1.2172
0.36732
0.89688
1.1268
0.6214
0.26733
0.4055
1.3437
0.40248
1.4141
1.1592
0.43592
0.81305
0.7157
0.70775
0.099122
1.0542
1.6615
0.26502
0.9888
0.45761
0.38123
0.38176
0.80306
0.98014
0.71365
0.457
1.3659
0.39412
0.18154
1.6482
0.54363
1.0846
0.2487
1.9511
0.69432
1.1237
0.63666
0.26204
0.1124
0.83914
0.70858
0.17361
1.0972
0.22641
1.4294
1.2267
1.0079
0.44391
0.41372
0.9238
0.35397
0.4579
0.38788
0.65608
0.082177
0.45819
0.90949
0.82194
0.52164
0.73049
0.7178
0.288
0.23773
0.73955
0.33051
0.043883
1.6363
0.62643
0.58861
1.1505
0.57865
0.64397
0.32109
1.0755
0.19881
0.95739
1.0235
0.43742
0.25722
0.51057
1.4175
0.37181
0.84622
1.1355
0.31759
0.58833
0.06025
0.46408
0.1122
0.074754
0.36754
0.45821
0.43852
0.89511
0.19855
0.50148
0.1686
1.0221
0.12008
0.20262
1.0692
0.58785
0.46785
1.0124
0.52121
0.46773
0.64131
0.8253
0.2225
1.5611
0.85274
0.577
1.0567
0.98405
0.37093
0.53078
0.76975
0.36383
0.3414
0.40169
0.62094
1.1253
0.11555
0.12809
0.765
1.4915
0.18343
1.5566
0.68334
0.156
1.1363
0.65134
0.56389
0.23015
1.2675
0.21623
0.9934
0.76408
0.4149
0.67044
0.41689
0.35837
0.92802
0.65121
0.90107
0.44047
1.7563
0.57102
0.53599
0.16465
0.61651
1.4069
0.28568
0.4665
0.041077
0.39553
0.45991
0.3058
1.284
1.1111
0.12265
1.3846
0.43469
0.4868
0.13679
0.88372
0.48762
0.44313
0.97875
0.41024
0.21878
0.59704
0.30585
1.3875
0.60186
1.5606
0.2748
1.0169
1.0539
1.2146
0.43368
1.8255
0.59566
0.12981
0.62529
0.64554
0.41959
0.82079
0.65798
0.29487
0.31906
0.38344
0.54258
0.73796
0.55807
1.2325
0.27576
0.30654
0.080588
0.11334
0.24395
0.70239
1.1219
0.50888
0.10273
0.47258
0.45772
0.6236
0.38582
1.638
0.34045
1.2752
1.2906
0.72973
1.2707
0.87168
0.28737
0.36377
0.75675
1.5046
0.20362
0.94849
0.17339
0.227
0.44107
0.41003
1.0038
0.62482
0.31406
1.1789
0.82082
1.2599
0.029223
0.37244
0.10153
0.33031
1.5433
0.34888
0.86317
0.94827
0.50086
0.6478
0.25514
0.74971
0.61412
1.4853
0.86357
0.30723
1.3774
1.6742
0.70565
0.20687
0.15439
0.068922
0.36718
1.1277
0.61593
0.062453
0.34668
1.265
0.15925
0.44896
1.6095
0.76073
0.064119
1.6829
0.78553
0.34474
0.062439
1.0394
0.1915
1.1651
0.86744
1.0014
0.21915
0.36763
0.55151
0.36195
1.5965
1.1217
0.45653
0.59841
1.5764
0.055734
0.45683
0.27709
0.21793
0.64812
1.3966
0.7463
0.59276
0.15768
0.28035
0.28943
0.53496
1.0538
0.1748
0.49534
0.36442
1.0775
0.51937
1.5991
1.1052
0.035605
1.1473
1.0033
0.50463
0.64801
0.2213
0.64503
0.44384
1.2082
1.3371
1.047
0.59751
1.7821
0.27229
0.41148
0.1713
0.6517
0.91541
0.82343
0.70811
1.1674
0.07567
0.14339
0.33288
1.7443
0.32086
1.4429
0.65488
0.20103
1.4187
0.2872
1.1814
0.27459
2.0176
0.64867
1.1204
0.61265
0.20316
0.1578
0.69585
0.9182
1.6343
0.45521
0.3588
1.2514
1.3771
0.12284
0.58163
0.88482
0.7146
0.4982
1.4425
0.80574
0.27327
0.035934
0.59185
0.079022
0.072332
0.42448
0.86456
0.59153
1.879
0.13488
0.29584
0.27254
1.3781
0.69393
1.1827
1.2543
0.60913
0.93362
0.33154
0.6416
1.238
0.51334
0.69825
1.2111
0.60581
0.5939
0.24374
0.37928
2.1519
0.28518
0.9048
0.29158
0.45558
0.5265
0.51507
1.983
0.86375
0.51127
1.6423
0.36874
0.15748
1.3812
0.56487
1.2572
0.26862
1.2805
0.5181
0.81107
1.1545
0.5499
0.40651
0.91958
0.60388
1.6275
0.89011
0.72259
0.89793
0.49317
1.5654
0.58421
0.85808
1.6879
0.35864
0.56712
0.091365
0.20173
0.26278
0.47124
0.55068
0.25074
0.11944
1.2755
0.58188
0.21157
1.142
0.67157
0.67085
0.47182
0.69893
0.68678
0.63291
0.97655
0.55788
0.13398
0.56864
0.95121
1.3735
0.25806
0.36492
0.39506
0.28234
0.39957
0.1303
0.40104
1.1413
0.21002
1.4485
0.39436
0.52105
0.44429
0.49661
1.4737
0.84582
0.53553
1.8821
0.099994
1.6097
0.14483
1.0188
0.47621
0.52119
0.93357
0.41695
0.19722
1.5277
0.2947
1.3459
0.8212
0.64735
0.19453
0.29582
1.313
0.55161
1.7199
0.7906
1.305
0.45943
0.26954
1.7002
0.31525
0.47911
0.082613
0.27988
0.52984
0.4896
0.83984
0.76066
0.51562
0.74606
0.28948
0.30714
0.076871
1.0526
0.32308
0.39969
1.1088
0.51787
0.84748
0.97939
0.6322
0.5343
0.60842
1.1023
0.51759
0.49988
1.5542
0.37028
1.3399
0.24914
1.3276
0.58426
0.18579
1.0041
0.3574
0.45139
0.046857
0.43734
0.52265
0.21159
0.56148
0.35433
0.27236
1.4187
0.6666
0.22927
1.885
0.53833
0.71759
0.19462
1.8788
0.69618
0.9995
1.6567
0.099148
0.074378
0.68199
0.3233
0.12428
1.1944
0.60909
1.3501
0.65481
0.35293
0.41339
0.89104
1.4889
0.3586
0.39414
0.16559
0.96775
0.089161
0.44484
0.65667
0.095272
0.38654
0.39591
0.36957
0.44962
0.34452
0.88403
0.4421
0.12791
3.4453
0.76954
0.27145
0.23092
0.42548
0.70964
0.22698
0.77231
0.92007
1.7465
0.56687
0.64157
1.1887
0.97149
0.43911
0.54448
0.6902
0.29006
0.41118
0.088475
0.37985
0.33096
0.091907
0.59257
0.78488
0.66738
0.35289
0.91895
0.44516
0.19457
1.0903
0.46469
0.16579
0.094731
1.0226
0.66658
0.76444
0.83081
0.32013
0.82344
0.72783
0.84671
0.60593
1.3367
1.1059
0.63118
0.96434
1.5987
0.23869
0.27748
1.0291
0.45682
1.0128
1.3215
0.69709
0.94848
0.088187
0.063793
0.32362
1.1566
0.092686
1.5904
0.83211
0.66161
1.7618
0.60914
0.34221
0.15238
0.96529
0.99469
0.70514
0.64859
0.53884
0.40991
0.59007
0.32105
0.40387
1.4777
0.87497
0.50106
1.1873
0.2643
0.74226
0.050082
0.42274
0.83233
0.3586
0.84371
0.18616
0.3782
0.44065
0.74946
0.29279
0.67653
0.56081
0.46325
0.5209
0.26771
1.527
0.74556
0.62862
0.40477
0.24495
0.51397
1.5106
1.1708
0.31683
0.42905
0.31203
1.1913
0.21892
0.88697
0.64735
0.77433
0.91285
0.15931
0.39645
0.92966
0.36076
0.47511
1.2418
0.88013
0.34237
0.045053
0.53872
1.2117
1.5665
0.2307
1.3232
0.52934
0.21465
1.7545
0.42162
1.2943
0.43554
1.4777
0.70686
1.1415
1.5592
0.12301
0.40614
0.64073
0.55637
0.78316
1.0434
0.63039
1.0521
1.8726
0.19366
0.097661
0.95578
0.61274
0.46012
0.34908
0.67221
0.70735
0.11543
0.96096
0.60105
0.09207
0.61854
0.8181
0.44433
1.2758
0.62904
0.67362
0.38163
1.1721
0.72427
1.4736
1.0994
0.57643
0.5533
0.31399
0.45215
1.7562
0.92962
0.45777
1.6273
0.25049
1.0389
0.21678
0.77878
1.2297
0.3752
0.51864
0.056007
0.28803
0.42921
0.4445
0.34781
0.92122
0.48206
0.21072
0.11301
0.32398
0.11588
0.87571
0.19143
0.22465
1.1387
0.39571
0.93403
0.92052
0.80848
0.57313
0.42608
0.30153
1.2158
1.5436
0.98203
2.0516
0.19154
2.5574
0.36511
0.2146
1.0465
0.46241
0.51015
1.4254
0.79312
0.59727
0.15095
0.19646
0.31764
1.3515
0.22963
1.3972
0.7763
0.3551
1.1366
0.62986
0.61564
0.38194
2.4548
1.0926
1.1462
1.0056
0.63407
0.5344
0.16485
0.44784
0.38959
1.5117
1.2972
1.8054
0.36039
1.5123
0.18364
0.52311
0.79063
0.52677
0.39162
0.24417
0.30116
0.91377
0.26483
0.09322
0.71825
0.57833
0.5401
1.2471
0.66404
0.21844
0.16159
0.78612
0.4641
0.048209
1.023
0.50111
0.82053
0.19577
1.1962
0.54052
0.51386
0.26806
0.63973
1.7764
0.27775
0.54239
0.37323
0.56432
1.3585
0.29068
0.97847
0.79426
0.34376
1.1555
0.33642
0.35667
0.19702
0.085041
0.16999
0.11666
0.20184
0.94588
0.69692
0.53757
1.4638
0.14712
0.65424
0.37266
1.1509
1.1481
0.50221
1.0264
0.54891
0.31649
0.25662
0.76692
1.5747
1.0799
1.9372
0.27093
1.6556
0.19978
0.54163
0.59242
0.60248
0.32376
0.30054
0.30098
0.40136
0.10465
0.42662
0.6234
0.4928
0.79145
0.3163
0.2186
0.31613
1.0467
0.21833
0.10552
1.2235
0.34334
0.64165
1.0079
0.72716
0.42572
0.60392
1.3214
0.24866
1.5583
0.49497
0.66896
1.0135
1.0013
0.38578
0.57452
0.63773
0.24874
0.30421
0.30274
0.15171
0.53351
0.065578
0.32414
0.57497
0.54644
0.31432
1.4489
0.71515
0.21878
1.1026
0.77188
0.67946
0.027174
1.045
0.099215
1.163
1.0189
0.52989
0.44596
0.41494
0.417
0.38057
0.61266
0.87824
0.3946
0.85187
0.069255
0.47687
0.38246
0.88765
1.8977
0.40805
0.17231
0.1695
0.78796
0.1869
0.25677
0.64033
0.65691
0.29279
1.49
0.5026
0.53896
1.3719
0.44216
0.94539
0.28171
0.64104
0.57779
1.2073
1.2765
0.37423
0.31051
0.32052
0.50231
0.17229
1.5051
0.49432
1.0909
0.34175
0.35858
0.51803
0.94276
1.4167
0.36018
0.38546
0.22407
0.76782
0.11228
0.024798
0.20598
1.0858
0.3925
1.2807
0.53545
0.19965
0.35808
0.13068
0.35646
0.45272
1.4748
0.85396
0.90666
0.7523
0.61708
0.16492
0.3045
0.94112
0.37004
1.6995
1.085
0.72971
1.1071
0.31253
1.1711
0.38435
0.98239
1.5672
0.42057
0.74345
0.32968
0.48907
0.54014
0.36198
0.83719
1.1107
0.12587
0.38302
0.70421
0.43538
1.7518
0.1642
1.1817
0.41277
0.5995
0.67342
0.78031
1.8553
0.10345
0.1714
0.75793
0.7189
1.6309
0.37797
0.80907
1.3644
0.41595
0.24768
0.61848
0.66791
0.27412
0.37674
0.35955
0.29664
0.57109
0.35071
0.063246
0.46574
0.38627
0.53578
1.0506
0.22469
0.53741
0.1873
0.44589
0.11269
0.2312
0.98326
0.77124
0.72748
1.062
0.38129
0.677
1.2159
0.073061
0.53703
1.0481
0.64459
0.67909
0.58693
0.44453
0.78348
0.60629
0.7403
0.55516
0.32924
0.38839
0.10417
0.58831
0.17402
0.055754
0.37303
0.52988
0.22657
0.86377
0.87918
0.2757
1.7308
0.38174
0.49832
0.080174
1.658
0.55302
0.9302
1.1102
0.66924
0.61119
0.36767
0.88924
0.41744
0.6559
0.52005
0.43724
1.7118
0.72513
0.86252
0.20618
1.0677
2.4661
0.28831
1.0242
0.45938
0.25562
0.37025
0.73322
1.2622
0.10241
0.23857
1.0105
1.029
0.14397
0.24258
0.604
0.39367
0.17385
1.3816
0.74405
0.80008
0.272
0.86025
0.30147
0.66333
1.0444
0.94362
1.1304
1.0739
0.5328
1.9091
0.37702
1.5327
0.39656
0.73247
0.91453
0.40723
0.44135
0.11683
0.91428
0.25445
0.079838
0.76325
0.63656
0.55908
1.2048
0.64422
0.28822
0.079907
0.34245
0.22857
0.13334
1.1315
0.9063
1.1571
0.68508
0.72929
0.59343
0.42986
0.095754
0.36053
0.13784
0.82541
0.27315
0.91477
1.3544
0.14849
0.57797
0.73068
0.38735
0.27807
0.42396
0.23373
0.93956
0.20925
0.065345
0.20015
1.3797
0.53154
1.0843
0.6566
0.33525
0.26721
0.45861
0.061627
0.36347
2.7064
1.0825
0.8829
1.3944
0.82049
0.33638
0.56322
0.26889
1.1954
0.37989
1.135
0.59416
0.046488
1.7945
0.60205
0.024501
0.75061
0.52803
0.66702
0.87534
0.83077
0.16556
0.14471
0.53652
1.392
0.37227
1.5908
0.77329
0.16292
1.2105
0.68322
1.0641
0.42881
0.17277
0.35137
0.38349
1.5892
0.18237
0.19153
0.58864
0.25839
1.1243
1.2522
0.49016
1.1739
0.51983
1.0885
0.21324
0.8746
1.1403
0.23038
1.0387
0.56171
0.44815
0.43195
0.78719
1.2885
0.77268
0.55372
1.491
0.94879
0.41218
0.05696
0.41167
0.49634
0.65525
1.1453
0.16246
0.55832
1.0009
0.51259
0.59202
0.44746
1.2866
0.42146
1.5297
0.99108
0.47865
1.109
[truncated: 70,906 more rows]
