# Supplementary material for: How human runners regulate footsteps on uneven terrain
Source: eLife journal article supplement (doi:10.7554/elife.67177), 2023-02-22
Supplement: supp [file elife-67177-supp-v1.zip › elife_poa_e67177_Figure_5_source_data_3.csv]

Blind scheme - Uneven I
inter_quartile_range_of_terrain_height_units_mm
3.8062
3.1237
5.3476
6.2171
6.1843
7.3347
0.087989
6.4999
7.2988
7.7098
6.5464
8.7634
7.0382
2.7343
5.6716
3.8077
5.9548
5.8674
6.0999
3.767
4.7141
5.5046
5.5521
3.4978
3.7092
7.5509
3.0733
2.3287
5.2792
4.7366
5.535
8.3103
8.1614
3.4131
0.98051
9.4953
6.731
9.7203
8.4652
7.8531
3.303
1.0015
4.2329
4.2221
5.4718
5.2062
6.3027
7.0892
1.4158
3.6932
2.6937
4.0926
3.372
6.8715
8.7126
2.4299
6.0047
7.9684
3.5129
5.1931
5.5533
4.1371
0.96149
2.6138
6.6171
3.8376
5.3379
7.8958
3.3915
1.1234
4.8538
3.9105
3.9846
6.1102
9.247
12.896
1.135
4.7495
4.8432
3.197
6.305
3.7199
8.2862
1.3301
4.6079
4.563
5.3137
4.7641
5.9899
4.0824
0.84749
5.2554
7.1471
3.7352
4.4113
3.6074
5.5017
0.85111
4.4073
4.6535
4.3068
4.412
4.3865
3.7897
0.89903
3.2011
6.3586
3.0597
4.0842
3.9394
4.477
1.5363
3.0801
5.9026
7.9236
3.8333
3.2017
5.1495
2.5992
4.1988
2.0542
9.7363
3.977
5.9015
4.1
1.7551
6.4415
7.6209
4.1464
5.7207
5.2783
5.0168
2.7352
3.2398
6.6332
3.9269
14.044
6.353
4.8623
1.8545
5.5359
2.3364
4.6009
7.7368
4.6695
6.8242
1.9485
3.9986
2.3495
3.5128
7.6557
9.3403
6.0715
4.3973
2.8389
2.7199
3.0363
7.5193
9.3216
6.2334
5.095
4.1508
2.1556
4.2915
6.2338
1.3515
4.6085
3.4791
7.379
4.5047
7.5748
0.56798
1.6927
3.9313
1.0321
8.1211
4.6814
3.6662
1.8669
3.7437
4.9648
2.5354
7.5573
6.7129
3.3379
4.8172
4.8327
4.1844
3.001
5.2853
6.5992
2.8597
6.988
6.6827
3.6817
3.2556
6.9993
5.7204
5.8984
6.3218
1.8316
3.3248
1.7692
5.9055
3.7023
4.2049
2.3332
6.6006
7.0756
6.5658
2.3573
7.789
6.9618
4.2737
2.5377
7.4821
5.0085
2.258
6.6254
5.3366
6.9426
4.0569
7.0839
2.1183
4.3549
2.5774
6.814
14.526
3.6221
7.0838
2.1637
2.7558
3.2881
2.5579
6.7104
4.6311
8.2898
3.1143
4.0674
7.024
5.3173
6.8125
2.9752
4.3648
4.6056
3.9487
6.5304
8.679
4.5381
5.49
4.6234
5.1335
9.0855
6.9097
5.5208
5.2399
7.8984
4.0515
2.3507
9.7195
7.941
6.4333
4.7563
5.1062
3.7185
2.3587
5.6596
5.0006
5.3119
7.8638
7.2533
5.113
NaN
12.588
9.2625
7.1068
3.7978
6.4543
8.8605
1.8783
10.3
4.4231
5.1169
6.6919
5.4359
5.9344
1.158
10.713
6.6783
6.9078
8.4134
4.4326
6.3647
2.4616
9.5557
6.0049
4.5731
6.1183
5.3765
7.9777
2.3977
7.0944
9.6257
5.3266
4.0943
7.4543
8.0012
3.3291
4.8923
6.8299
9.5308
8.6815
6.9081
9.0847
7.3516
3.432
8.5739
7.0556
9.4291
3.7332
3.8609
2.8671
6.5111
9.5102
6.4451
4.6201
4.2755
8.0353
2.1328
4.8117
6.5926
8.7761
3.448
6.0808
11.428
1.6285
10.273
10.936
9.536
8.6634
7.6211
5.1374
1.5626
8.0677
4.5229
5.867
3.312
4.7125
8.7401
2.3838
4
3.6108
6.1313
6.7297
4.6346
5.5099
1.5384
7.6211
2.8473
3.7914
6.176
10.123
11.948
3.067
7.3782
4.7147
9.602
6.6869
9.776
12.448
2.2482
5.767
6.2684
10.254
6.2995
2.6188
8.3573
2.0729
5.2001
6.1649
3.529
4.8237
4.933
10.585
4.8618
6.4051
4.7076
4.1414
6.8254
4.7127
8.8286
3.4997
7.3747
8.2701
9.4989
5.4429
5.7623
11.492
2.422
1.3952
1.6917
3.0805
4.349
2.1778
5.1749
5.0181
4.2494
4.7796
5.8826
7.213
4.2298
2.3312
4.9013
1.8864
3.8783
1.6704
6.5349
9.1443
1.5856
6.1387
1.6727
2.8436
4.3869
9.1591
3.4781
6.0495
6.6784
2.6077
1.8744
6.5199
6.3985
5.9044
5.955
3.9651
3.0661
3.3113
7.5679
7.4257
7.7764
3.5658
1.3189
4.4721
3.5482
8.176
7.7065
7.7224
7.4353
2.3552
2.8124
3.7133
6.6432
6.97
5.2561
6.2662
5.1828
1.5157
7.2813
4.0003
8.1793
1.5714
2.127
2.7182
3.5439
3.9942
4.2038
4.8283
3.6302
6.5278
5.386
13.237
6.5603
5.726
8.3374
7.6198
7.3499
5.1024
7.3308
8.4654
8.3831
10.373
6.1557
9.8174
4.2599
7.1785
6.7378
6.8872
5.7889
5.6969
10.858
3.4503
13.808
8.9567
7.1126
7.3588
5.4828
5.8623
2.3656
10.774
6.5927
4.7055
8.7072
12.891
17.484
3.8428
4.6658
4.5473
9.5264
7.0796
7.7658
9.9843
9.3941
8.8108
4.7306
7.1332
2.6911
1.298
6.6814
6.6588
2.2353
4.7146
6.3757
9.2128
6.1735
6.003
5.4574
2.1433
2.3997
5.9401
9.2738
9.546
5.603
5.269
14.975
12.596
9.9457
4.3294
5.6626
8.215
5.8934
6.4369
7.4218
9.3806
2.2659
10.747
3.8805
11.37
9.0111
4.2968
5.2388
10.304
6.5821
2.5506
9.4777
21.664
8.5766
3.7911
4.2619
5.4925
4.2636
7.2148
21.637
5.726
4.5312
4.6581
10.834
10.554
4.1893
11.418
3.2931
4.2468
3.9372
5.6161
18.078
1.5316
10.962
7.1665
10.51
5.0215
4.5548
16.905
1.2918
11.879
6.1362
4.8438
3.7303
4.1638
8.1394
3.6862
5.0836
4.3879
7.6639
6.5634
8.0215
4.9846
3.3159
4.25
5.4955
5.5828
6.9313
6.9328
6.8951
5.2433
10.89
2.8163
3.3365
7.3337
6.7404
13.361
8.1083
6.4916
4.5751
5.3327
4.2474
5.5519
15.19
9.4686
16.223
8.5285
2.3092
9.0358
9.1257
7.9059
8.705
18.561
5.5708
2.7199
10.758
7.2267
7.7679
6.1628
9.74
7.1524
5.5164
9.9695
4.3423
6.3796
6.2251
5.0014
8.7285
6.0287
9.6108
5.1633
7.8988
8.5131
7.3523
6.1095
7.2002
5.6507
8.0948
13.098
9.6226
10.319
6.4666
7.1097
8.1498
5.7656
5.9886
3.7992
7.6607
9.3753
8.7719
9.1571
5.3993
1.6346
0.65291
NaN
0.00016533
1.4544
NaN
NaN
NaN
NaN
8.4774
7.9686
8.2471
14.151
10.497
5.7191
3.0197
13.747
3.7079
8.3266
2.9455
2.9612
3.1531
1.2851
9.3781
4.8829
8.7844
2.4808
4.6437
5.6993
3.2282
5.497
6.2634
8.2342
6.9562
2.3756
4.9712
1.6557
6.3249
5.8476
5.5058
3.8148
3.9347
4.2865
2.3281
7.9014
6.3983
4.8093
3.8384
4.9903
5.6208
3.4835
7.6522
10.556
5.7083
5.0793
8.1289
6.0608
2.2388
6.9335
4.599
3.2822
4.3363
3.9924
4.1181
1.9758
4.932
6.3263
3.7385
5.2583
6.2192
3.4102
2.1692
6.2813
5.4537
3.5182
5.8182
4.5876
2.2362
0.86285
8.1051
5.5273
7.4721
3.1003
3.3265
1.8416
0.40857
5.2471
6.1175
4.4442
2.423
3.3947
8.5021
1.0409
5.7504
3.3324
3.6753
2.2934
5.3633
5.8698
1.1754
9.699
4.5375
6.0499
3.8334
2.2661
2.6018
3.7637
8.8555
5.301
4.8394
8.358
9.1435
9.4212
4.7835
6.9516
4.4716
9.0828
8.5003
9.2269
2.913
2.4735
3.045
7.4685
3.9095
3.4421
6.1849
6.1761
2.4736
4.2219
4.5779
2.2647
3.139
2.1894
5.4337
2.0888
8.1403
6.4861
5.1284
3.9213
3.2964
5.2734
1.4794
5.5502
7.4401
5.2729
4.1149
5.0138
6.0344
4.1678
9.097
6.7156
6.7798
6.7802
3.6662
6.3758
3.6752
7.1439
6.533
5.7964
8.695
3.0439
4.4432
3.1814
7.0461
9.509
6.7274
4.4773
1.9768
5.1909
3.263
6.2078
4.2259
5.4274
4.0894
5.9544
6.9958
2.644
4.2831
4.4621
9.398
4.9412
6.3307
5.8246
2.0316
7.9611
6.8175
7.1847
5.4667
6.7013
3.2171
1.2446
4.7281
3.1809
3.6279
3.5295
1.7835
3.2559
3.6276
2.5649
2.5824
7.0892
2.6184
2.309
5.0261
2.8862
4.4206
4.6247
7.7569
3.2004
8.7585
4.3698
3.0898
3.3054
2.6551
1.828
5.191
5.6303
2.832
4.6172
5.6541
2.2673
3.7004
3.4851
2.5766
7.9395
3.9191
9.6372
4.1406
3.9779
4.6267
5.2525
8.5958
1.6572
4.0973
3.6143
6.4768
4.7098
6.2141
5.7289
4.342
2.625
2.8115
7.2488
4.7539
2.6559
3.8227
2.1189
2.2303
5.0781
4.9223
2.2247
9.5147
4.4142
2.1126
3.9074
2.8513
5.0089
5.5128
7.1202
6.9923
4.7126
2.9706
3.4545
5.2657
5.0598
4.8685
8.0754
2.5943
2.7967
3.9444
2.6124
4.1334
7.3408
5.7167
0.13264
8.8751
5.2877
10.535
13.415
12.456
5.7244
6.7183
7.5181
4.8734
3.1064
12.467
3.6603
5.02
6.5493
8.799
11.552
5.1892
8.2606
4.5032
13.447
1.9173
9.3227
4.2365
3.7756
5.1366
2.6592
13.021
1.448
13.089
7.8883
6.3647
4.7008
5.4805
5.9655
1.8627
4.5327
5.3571
7.5671
5.7506
6.9153
7.3724
6.2908
11.722
8.4427
4.295
7.7396
3.7201
6.7118
3.9668
9.2255
10.64
7.0992
3.7004
5.4992
10.068
2.3706
10.662
5.0268
4.9951
6.0134
4.4629
3.0938
8.6157
9.8008
7.9028
5.1761
3.3738
12.527
5.0411
6.5603
10.394
4.4055
2.1977
3.9149
7.8447
3.1934
8.3439
11.418
5.1394
5.5954
6.671
9.2922
11.505
6.0685
11.256
2.72
5.8401
12.914
17.688
8.2804
5.8485
3.8049
5.5645
8.1164
6.4425
11.954
3.8337
8.7955
10.641
7.6337
8.0497
8.759
11.561
8.6138
3.4129
11.161
12.239
10.854
9.8829
7.3567
9.9405
4.7732
15.715
11.321
10.398
5.3042
4.4127
4.5607
5.9486
12.416
4.7239
6.3298
9.0162
4.773
6.5646
1.7617
11.288
10.498
5.9394
9.4435
7.1467
6.9739
1.4317
5.097
8.1657
7.1916
12.057
7.0283
11.845
2.251
12.202
5.4631
6.0117
3.0285
4.7632
6.1938
2.4636
14.116
2.9087
9.6219
11.427
3.9795
6.6336
1.2744
10.783
3.5321
5.6291
7.317
3.6079
5.4163
4.0861
2.6158
5.1016
10.649
11.078
4.7239
10.559
5.9844
8.56
4.9607
6.8039
9.7616
4.5575
9.4753
3.584
4.5658
8.3732
3.2985
6.3896
1.9545
5.0627
3.0712
11.777
7.4848
6.8477
5.5181
3.6309
5.8092
4.0413
7.4334
2.0736
5.6447
5.8706
4.9646
3.5904
2.1932
3.3866
4.2767
6.0532
7.7729
2.4202
6.5746
2.3884
9.7359
5.363
1.9459
7.0506
4.6041
3.6654
6.814
3.5529
6.1918
11.529
6.8576
6.9254
4.9045
5.1989
5.7611
4.019
6.8045
11.007
5.3114
3.4517
3.7412
7.6718
6.3216
2.8417
2.4494
4.0402
4.2513
3.4935
5.8746
4.6449
4.3669
2.4314
4.7057
5.6337
7.5801
3.3543
4.4483
3.9882
5.1915
4.5998
8.1996
11.546
4.7372
2.4945
4.7399
3.9565
6.0155
6.9747
11.22
4.0328
6.7756
3.8241
6.1143
4.004
7.051
3.1643
5.0363
5.2279
3.7393
6.1738
5.4151
8.1862
4.6816
NaN
0.28156
0.7409
NaN
NaN
NaN
NaN
2.5706
7.6042
6.2426
8.9882
5.0355
4.5057
NaN
11.179
7.4941
8.6456
7.9012
9.8587
6.7663
2.036
10.257
4.9384
4.6124
4.9568
3.0294
6.1806
3.0478
4.9072
9.8282
13.186
4.4975
3.3922
4.5369
2.8317
4.6129
2.6567
3.4547
3.1183
3.6054
8.2616
3.8059
8.9359
8.2754
1.8028
3.7134
5.4387
4.7052
5.0198
8.8574
8.4676
6.4555
3.4109
5.533
5.6179
6.6497
4.0193
3.4615
15.052
12.067
8.0603
5.7784
1.8697
2.9774
3.566
6.3084
4.3061
5.8567
7.4318
2.0346
5.4078
3.5243
3.5511
3.5144
7.6363
10.842
4.1235
8.4455
2.1238
6.0992
2.9155
7.0905
3.5595
2.3057
5.7909
5.4043
6.1927
5.6984
7.319
4.0033
2.0955
6.1971
4.2119
8.6369
8.9122
3.3996
6.5975
2.6909
5.0396
4.5449
3.2245
6.2233
8.835
5.2827
2.148
10.871
3.9276
10.401
9.3899
6.288
5.1709
5.7252
6.2962
5.0531
4.4252
6.447
4.2511
5.9288
5.6244
6.3028
3.36
6.1473
5.2501
4.5243
4.8925
3.8041
6.7042
3.2204
4.0715
3.4451
8.3539
9.6814
4.4594
4.92
4.6528
6.3572
7.5665
8.0231
10.596
3.698
