# Supplementary material for: How human runners regulate footsteps on uneven terrain
Source: eLife journal article supplement (doi:10.7554/elife.67177), 2023-02-22
Supplement: supp [file elife-67177-supp-v1.zip › elife_poa_e67177_Figure_5_source_data_4.csv]

Blind scheme - Uneven II
inter_quartile_range_of_terrain_height_units_mm
9.9938
8.9218
15.924
6.9541
13.939
11.307
4.5161
16.065
2.1939
4.0624
6.735
3.1268
12.727
5.9654
10.865
4.7855
6.5263
10.841
5.2501
11.77
4.8523
3.672
8.1818
6.3693
5.0496
12.864
9.7317
14.387
5.6254
5.4938
8.2606
14.177
4.0715
5.705
14.4
8.2581
8.5902
6.5641
13.994
5.5688
1.3537
13.407
7.9562
9.0567
8.0701
18.264
5.9802
9.4192
5.8901
5.9429
6.8894
6.8727
4.6795
12.25
4.1106
7.3554
14.542
9.9616
5.1237
8.1434
7.0054
9.732
10.219
23.812
5.7237
6.2788
5.7689
5.2982
10.617
5.3246
19.722
12.724
9.4764
6.1167
10.299
15.056
3.0102
14.022
8.7381
3.2794
9.3367
15.076
9.6057
2.9698
25.07
4.7336
6.9623
13.137
4.2402
5.2617
9.5077
12.744
5.4938
7.516
12.216
9.071
7.0356
0.55165
10.117
2.5754
8.9459
12.897
4.8504
7.7661
5.2241
19.944
7.9115
3.6351
3.711
5.2622
10.34
12.718
7.7407
4.1663
2.404
5.9274
9.114
6.7686
7.805
10.966
3.2763
5.469
11.174
8.5078
5.7164
12.957
3.2137
17.612
14.671
9.0209
6.0419
16.888
2.9773
15.221
10.453
10.08
7.2225
10.232
9.9304
3.1725
17.572
10.882
4.1434
8.0881
4.7481
8.4703
5.4786
13.306
9.38
2.9406
8.0977
11.4
2.9842
11.266
16.61
4.6174
2.3409
4.5869
9.0277
10.778
5.7988
14.653
1.5775
1.4861
4.5952
9.2941
7.0403
3.7597
20.115
4.6261
4.5526
7.7114
11.23
7.0975
2.8479
11.744
8.5653
8.7282
13.143
8.496
6.4192
3.4421
11.27
8.6389
5.5585
4.8071
2.3578
16.852
1.8966
10.42
4.4336
8.0848
5.1084
6.6339
10.109
4.9381
8.2347
4.3019
15.679
10.954
11.599
17.483
2.6829
3.014
9.0459
6.3799
3.7991
5.3289
12.776
2.4301
19.209
5.6079
15.92
6.3042
4.8968
12.248
7.6775
14.457
15.481
8.6394
11.58
1.5671
6.6969
6.1724
12.822
6.3433
5.3587
9.6178
10.055
9.4553
3.8446
21.666
6.8021
9.4676
6.5801
8.9745
5.2266
11.99
10.64
3.9996
5.7481
11.65
4.6447
9.5317
10.503
14.037
5.9378
9.9366
5.9834
5.4476
7.8145
9.3878
12.159
4.8292
8.3349
5.1115
12.603
3.7184
6.1293
1.771
6.2337
9.847
8.6638
9.8431
7.6077
3.8258
NaN
NaN
NaN
0.97862
1.525
5.845
6.3444
12.369
7.0225
12.827
13.295
4.8687
19.496
0.98251
5.5052
2.3533
12.315
4.6213
9.9704
9.5338
13.874
4.7828
5.6198
3.4183
4.5251
11.517
10.242
15.762
8.0531
2.7516
5.7331
14.939
16.486
7.3209
6.962
19.937
7.9402
6.5812
9.6537
6.383
7.5037
4.3124
17.432
13.095
5.9379
7.7907
12.942
10.449
9.1214
27.781
9.4275
11.747
10.953
9.4453
2.8272
12.597
22.606
5.6741
5.7225
7.6607
8.4122
17.02
4.0708
29.89
9.9381
11.681
7.6329
7.1806
12.918
2.4024
18.897
7.3029
4.5687
8.1561
6.1246
13.183
3.6332
18.717
8.9075
11.513
6.4713
6.9401
6.5755
13.376
11.768
12.633
8.5939
3.5105
8.5681
7.5178
4.1043
5.5679
3.9025
7.6473
5.5228
3.6967
13.686
8.3667
12.632
9.8121
14.186
3.9311
4.3679
10.908
6.9802
14.798
15.967
9.3405
11.382
10.595
13.969
2.9822
17.958
16.616
7.0244
6.3615
6.1505
10.688
1.5503
12.036
3.6695
2.9673
9.2327
9.0962
11.495
1.7971
20.493
6.6789
11.123
5.7756
14.324
22.806
1.3776
13.887
12.382
17.232
9.6023
14.944
14.81
2.1303
NaN
NaN
1.1198
0.97592
3.1305
0.45311
NaN
11.387
12.335
16.455
12.944
27.599
23.488
9.172
6.7805
16.427
7.7086
13.96
14.833
6.5274
11.376
4.036
9.0922
11.278
12.871
6.6883
12.949
6.5125
15.429
16.798
7.4234
6.7669
10.206
12.575
3.2242
14.151
10.529
9.3155
11.199
7.2014
14.542
1.2021
6.1154
4.4376
12.623
9.7557
10.214
16.474
3.6016
9.2823
9.2927
6.0004
3.1382
8.9009
6.2969
9.8169
11.35
6.4023
14.512
4.7471
4.2388
9.562
13.086
7.1665
7.1251
11.226
5.499
8.8765
5.4946
13.43
8.246
4.4903
4.0868
7.2279
2.8501
4.5775
13.815
7.8047
5.6159
15.136
3.8552
9.3179
9.7178
13.518
9.9303
6.2963
3.3928
18.904
12.753
8.4937
10.412
7.1986
11.193
13.337
8.7074
11.28
14.76
2.4383
7.8485
14.003
7.8523
14.423
7.2087
8.4544
8.141
7.8049
14.58
13.05
12.003
9.6724
8.7665
8.6388
14.746
14.117
7.009
7.6232
8.5787
8.2953
15.553
10.808
3.7415
6.282
12.257
7.3326
4.9379
13.217
11.281
10.147
5.1435
10.821
7.7007
8.5417
5.068
10.027
9.248
5.8709
10.217
9.0688
8.7276
5.2353
2.3214
9.3139
13.618
13.804
13.827
16.253
11.742
6.1538
3.8301
2.367
7.8637
4.8418
6.589
4.7239
7.3493
8.7738
10.132
13.064
4.0994
7.4886
6.5091
7.1633
4.2445
6.4181
11.548
9.5585
10.251
6.8194
12.659
3.9411
2.7032
6.7541
5.4538
6.8833
5.5723
6.1313
1.9353
5.3171
3.9638
6.9797
6.2258
4.97
8.486
2.6285
6.5298
9.1177
5.4015
5.4368
4.4443
13.564
2.2054
7.2517
4.5183
4.7449
14.119
2.1032
13.493
2.8974
4.6033
3.8316
8.2355
9.4222
1.6991
12.048
6.4952
2.7482
6.5938
4.0616
10.49
5.1805
21.496
8.7258
1.0322
3.7931
5.6428
8.92
3.8718
19.865
7.1815
5.7178
5.8492
6.9849
12.372
3.4591
11.099
8.0059
5.8955
5.1
6.819
6.6704
17.587
19.337
7.9109
8.1451
3.0229
4.8571
9.3914
7.2244
12.157
5.3637
5.4946
4.4865
9.3273
8.188
4.8486
17.773
5.6268
6.4461
4.6938
4.5781
13.149
6.5399
11.355
6.315
10.431
10.438
6.1693
7.1718
4.2851
6.8111
4.6133
2.7223
2.2101
4.818
7.7291
6.006
5.9059
10.274
14.532
11.341
5.7931
8.1427
6.9257
NaN
1.2424
0.25523
NaN
NaN
NaN
NaN
2.3633
15.699
18.948
13.062
20.682
2.7772
2.978
20.754
8.6287
4.2655
4.261
6.7235
19.294
5.0379
14.027
4.5447
2.0739
1.8938
9.946
8.1832
8.3231
18.408
11.813
5.1635
4.1364
5.0214
17.25
6.3613
23.51
6.6927
11.579
6.4808
9.1003
21.318
5.207
12.198
11.466
7.6016
6.5095
11.089
16.449
4.3534
17.302
5.8274
11.379
9.1677
7.7231
12.018
1.8768
16.155
11.929
10.341
12.05
8.9892
5.766
7.7383
13.595
10.844
12.56
7.4739
9.4056
5.3861
5.2687
5.6949
15.607
6.6065
7.0697
6.8491
9.5569
4.5929
4.7954
9.9904
3.7959
5.6881
1.9254
4.9358
10.279
1.6591
12.385
2.7965
2.2257
7.2851
5.9529
11.507
12.539
6.6135
9.0511
5.0752
5.439
2.6922
18.288
16.059
18.621
9.6212
7.9792
15.716
7.2142
14.235
8.0038
7.1648
7.7034
11.241
5.3262
8.638
8.2048
10.205
5.4415
15.621
5.3447
10.708
11.475
1.0178
11.681
6.033
10.937
6.2152
8.6277
5.8939
1.7502
6.2373
8.8592
7.4146
10.413
12.465
20.557
2.5282
6.8123
6.3376
7.7544
8.4724
10.442
6.132
0.94714
NaN
1.5565
2.712
4.9435
1.8172
0.37509
NaN
3.3758
3.1677
6.2787
5.2074
9.9876
5.8543
1.091
9.7997
6.2951
7.1184
6.659
5.2656
17.828
2.3729
15.248
9.5041
10.159
10.398
8.1232
17.208
6.6777
16.244
5.4866
4.5577
5.2806
8.484
8.3235
11.872
12.017
5.4753
5.0297
7.0025
6.4797
9.2986
9.5824
11.517
7.5763
10.391
7.477
5.0755
4.0732
9.7227
14.497
6.0926
7.8306
7.0845
7.3697
6.3302
13.508
21.508
8.9585
6.8867
4.3901
5.0939
11.002
4.3488
14.574
8.4565
6.2114
11.116
11.407
17.226
9.1535
13.492
5.3519
3.467
10.139
11.642
5.8519
15.635
18.987
3.9907
10.062
12.003
4.5306
7.144
8.6185
11.689
3.2959
4.0257
3.2237
9.1496
7.2672
6.6143
4.3672
4.8311
10.697
10.817
10.48
4.6379
9.9935
4.9765
9.1375
4.3007
8.5363
5.1552
5.2476
14.437
4.8206
9.3211
8.5727
4.4589
7.8538
9.9132
7.8744
7.2052
7.4821
6.66
10.229
10.566
4.9414
13.998
4.1554
10.792
3.8788
8.3547
6.6867
5.5236
9.6797
4.5169
13.17
7.6836
8.1256
4.9493
4.6006
11.417
9.3252
10.808
6.7662
10.058
8.5019
19.935
9.9546
0.37913
3.5572
2.2406
2.3894
1.6844
1.1292
0.74452
6.7591
9.183
3.3897
9.9148
6.0507
7.3531
3.0664
3.8093
18.249
22.451
20.031
11.958
14.067
2.7685
8.8098
5.0815
5.829
5.6095
3.6001
8.0224
4.5393
4.3106
4.0569
6.607
4.3715
6.6904
9.5107
4.3113
4.8541
3.2308
6.6221
2.6673
12.336
20.711
2.9283
8.1997
8.1718
5.9728
2.48
8.6736
9.3608
2.1128
11.232
5.7189
5.9832
10.886
2.402
5.2303
6.3216
5.9092
6.2946
1.425
3.7089
4.4468
5.9319
0.83948
8.8883
5.8945
10.569
11.013
9.6404
10.701
6.1687
13.409
3.4154
6.5344
10.11
5.352
15.319
3.3983
8.9845
4.5967
11.091
16.156
10.674
6.281
10.261
16.584
5.763
4.3013
17.709
16.971
4.4492
6.3676
14.556
8.2955
3.9337
6.625
12.195
5.9116
9.6538
10.089
7.6382
4.1389
5.115
3.1601
8.4691
7.9149
9.8291
4.9688
6.6511
3.6993
7.0197
5.779
7.0259
14.042
6.3432
4.5247
4.6022
6.7805
7.4475
12.913
1.887
11.744
2.5793
2.3203
4.1958
11.624
9.4998
11.809
8.3791
4.361
4.6241
3.5113
3.9527
13.349
8.4627
6.3395
9.2797
10.748
9.5242
10.323
18.202
1.7941
5.0444
1.2618
5.0963
2.868
3.2748
0.1359
11.362
15.302
11.909
7.1092
12.182
16.897
2.8008
14.782
3.766
6.9286
6.8738
10.277
6.6004
7.6136
17.244
4.2078
8.1317
16.212
9.3013
6.404
6.3471
9.9654
8.1399
12.468
12.623
17.197
6.368
7.8253
7.8516
4.0911
8.5424
6.3726
11.978
9.0922
9.6405
6.8817
3.7406
13.724
5.8422
6.6654
11.496
3.7036
4.5895
8.3148
5.208
2.2306
3.7871
4.4659
7.915
12.196
13.104
10.537
6.1353
14.564
13.166
7.0548
13.831
6.1908
7.4222
4.4134
6.9439
23.551
1.4916
11.689
4.9279
8.4892
5.341
8.771
29.073
5.1427
8.3571
7.9579
10.934
11.447
5.1881
12.797
3.3767
9.7099
6.4603
6.7551
12.855
8.5847
6.8739
4.468
5.7095
2.661
7.0361
8.771
15.445
9.8744
3.7438
7.8277
6.9608
6.7591
8.2633
4.3217
11.478
4.5748
19.4
9.7287
8.1697
11.713
4.2154
14.73
7.1387
20.364
11.04
4.3026
12.206
3.0171
8.2067
9.3904
13.206
15.228
10.431
12.595
5.4862
5.2615
8.9905
7.0762
8.0047
6.8688
6.258
5.4148
10.067
3.7075
9.4027
12.189
12.356
5.3799
10.346
9.7374
NaN
2.4095
16.191
7.0688
3.5081
5.0017
11.779
4.908
10.802
5.2266
3.7628
13.329
15.824
6.6021
4.7274
8.7229
4.4808
6.9295
13.604
8.7899
5.2425
6.1703
7.0476
7.1954
14.213
3.5671
8.632
6.3463
1.8538
7.3789
5.8023
7.534
10.625
10.397
9.9325
11.002
9.6825
5.323
5.8856
9.3578
5.4738
11.889
2.8974
19.023
15.794
14.036
6.593
8.6938
8.0499
17.783
13.35
16.762
3.0598
8.8899
11.167
15.471
15.738
9.6616
5.6573
5.5938
14.389
15.166
7.1294
7.3116
11.425
3.657
9.4713
9.5814
9.8424
13.483
4.6344
18.826
4.8446
12.478
12.476
10.553
7.0904
7.806
16.539
10.726
13.417
6.2568
5.4352
11.984
6.9715
4.7782
11.701
5.7494
8.9434
6.3644
16.121
2.9005
4.8614
14.945
10.143
9.1795
11.466
5.0888
4.177
7.4884
11.453
6.2571
12.402
8.631
5.9116
8.6322
10.321
7.1933
10.496
6.0404
6.6341
5.5907
16.723
19.799
20.314
6.8819
2.3983
5.6165
5.4785
14.663
21.561
5.1705
6.8614
13.875
18.764
17.1
22.412
5.5244
11.524
5.565
13.512
8.4
13.438
9.9544
