# Supplementary material for: How human runners regulate footsteps on uneven terrain
Source: eLife journal article supplement (doi:10.7554/elife.67177), 2023-02-22
Supplement: supp [file elife-67177-supp-v1.zip › elife_poa_e67177_Figure_5_source_data_5.csv]

Measured footsteps - Uneven I
subject	inter_quartile_range_of_terrain_height_units_mm
1	4.6197
1	4.86
1	7.5691
1	6.3215
1	11.056
1	4.866
1	6.8134
1	5.7031
1	5.1993
1	3.6504
1	7.2762
1	7.9326
1	7.6321
1	3.4406
1	7.8798
1	5.2915
1	10.888
1	3.4236
1	4.1375
1	3.7938
1	8.0637
1	5.3676
1	6.3589
1	5.5678
1	2.5119
1	3.9728
1	8.3901
1	2.5082
1	3.1743
1	7.8085
1	1.7471
1	6.6176
1	3.5366
1	4.3689
1	3.4952
1	4.171
1	2.5305
1	7.756
1	3.951
1	8.8218
1	4.5532
1	6.8238
1	3.8502
1	5.1012
1	5.1452
1	2.2896
1	4.9771
1	5.3409
1	3.5716
1	4.0632
1	4.033
1	5.2724
1	6.7289
1	4.8856
1	4.4064
1	5.4115
1	3.4118
1	7.2586
1	7.0177
1	4.4163
1	2.6034
1	6.272
1	5.9137
1	8.052
1	7.0778
1	5.2923
1	8.0072
1	3.5453
1	8.4892
1	4.785
1	5.0395
1	7.5145
1	6.1513
1	7.5324
1	8.2268
1	8.2089
1	3.131
1	2.5679
1	6.9337
1	7.4446
1	4.594
1	1.7466
1	4.3867
1	4.4198
1	7.3329
1	5.9194
1	4.7396
1	2.9529
1	6.2336
1	3.9718
1	4.6244
1	5.9272
1	4.7715
1	5.9695
1	2.663
1	6.1225
1	7.1612
1	1.3099
1	4.8178
1	4.7922
1	7.2776
1	5.798
1	2.1581
1	6.7338
1	2.8357
1	4.9254
1	2.6269
1	9.358
1	6.4694
1	7.4297
1	7.2217
1	4.4207
1	6.8468
1	2.9184
1	6.332
1	9.0923
1	2.6363
1	5.7763
1	7.2993
1	5.9092
1	5.2494
1	9.3797
1	3.485
1	2.6568
1	7.8092
1	5.107
1	2.8412
1	1.6902
1	7.3937
1	4.5684
1	8.6695
1	2.3262
1	6.9718
1	5.3914
1	6.0808
1	6.9829
1	2.9218
1	6.3838
1	6.2707
1	5.0688
1	5.5784
1	5.318
1	3.8374
1	3.2173
1	4.6766
1	4.2281
1	10.139
1	9.2494
1	6.1006
1	2.8209
1	3.3322
1	5.42
1	2.1992
1	4.273
1	8.2452
1	4.1765
1	2.7198
1	2.5369
1	4.5111
1	7.3033
1	3.5434
1	5.6121
1	6.2419
1	1.9741
1	1.8309
1	5.1608
1	6.4818
1	9.6336
1	6.4818
1	9.6336
1	4.1047
1	5.5014
1	7.3529
1	5.0594
1	2.5024
1	6.3103
1	4.6381
1	4.4535
1	3.4777
1	2.6202
1	3.1591
1	6.1181
1	3.3422
1	8.1515
1	1.726
1	11.444
1	3.5246
1	5.5864
1	2.2529
1	2.5957
1	10.613
1	1.7496
1	5.5207
1	4.0768
1	3.9804
2	4.8876
2	3.9447
2	6.2763
2	5.4815
2	7.1839
2	6.782
2	6.0981
2	5.5098
2	8.576
2	4.9091
2	2.6939
2	3.2565
2	9.0523
2	1.4619
2	6.5724
2	7.8073
2	6.1139
2	2.4155
2	5.9418
2	5.4589
2	6.2766
2	4.6787
2	4.8948
2	4.6532
2	4.8969
2	5.269
2	4.7961
2	6.2901
2	5.253
2	5.6221
2	4.3784
2	5.4598
2	7.5069
2	5.0805
2	5.1792
2	5.4338
2	7.5442
2	1.6338
2	9.7859
2	5.1792
2	5.4338
2	7.5442
2	1.6338
2	9.7859
2	5.1792
2	5.4338
2	7.5442
2	1.6338
2	9.7859
2	5.1792
2	5.4338
2	7.5442
2	1.6338
2	9.7859
2	5.1792
2	5.4338
2	7.5442
2	1.6338
2	9.7859
2	5.1792
2	5.4338
2	7.5442
2	1.6338
2	9.7859
2	8.4156
2	9.3418
2	8.4156
2	9.3418
2	4.4112
2	1.6325
2	3.0684
2	6.1794
2	4.2961
2	3.8493
2	4.4112
2	1.6325
2	3.0684
2	6.1794
2	4.2961
2	3.8493
2	4.4112
2	1.6325
2	3.0684
2	6.1794
2	4.2961
2	3.8493
2	4.4112
2	1.6325
2	3.0684
2	6.1794
2	4.2961
2	3.8493
2	4.4112
2	1.6325
2	3.0684
2	6.1794
2	4.2961
2	3.8493
2	4.4112
2	1.6325
2	3.0684
2	6.1794
2	4.2961
2	3.8493
2	4.4112
2	1.6325
2	3.0684
2	6.1794
2	4.2961
2	3.8493
2	4.4112
2	1.6325
2	3.0684
2	6.1794
2	4.2961
2	3.8493
2	4.4112
2	1.6325
2	3.0684
2	6.1794
2	4.2961
2	3.8493
2	4.4112
2	1.6325
2	3.0684
2	6.1794
2	4.2961
2	3.8493
2	4.4112
2	1.6325
2	3.0684
2	6.1794
2	4.2961
2	3.8493
2	4.4112
2	1.6325
2	3.0684
2	6.1794
2	4.2961
2	3.8493
2	4.4112
2	1.6325
2	3.0684
2	6.1794
2	4.2961
2	3.8493
2	4.4112
2	1.6325
2	3.0684
2	6.1794
2	4.2961
2	3.8493
2	4.4112
2	1.6325
2	3.0684
2	6.1794
2	4.2961
2	3.8493
2	4.4112
2	1.6325
2	3.0684
2	6.1794
2	4.2961
2	3.8493
2	4.4112
2	1.6325
2	3.0684
2	6.1794
2	4.2961
2	3.8493
2	4.4112
2	1.6325
2	3.0684
2	6.1794
2	4.2961
2	3.8493
2	4.4112
2	1.6325
2	3.0684
2	6.1794
2	4.2961
2	3.8493
2	4.4112
2	1.6325
2	3.0684
2	6.1794
2	4.2961
2	3.8493
2	4.4112
2	1.6325
2	3.0684
2	6.1794
2	4.2961
2	3.8493
2	4.4112
2	1.6325
2	3.0684
2	6.1794
2	4.2961
2	3.8493
2	4.4112
2	1.6325
2	3.0684
2	6.1794
2	4.2961
2	3.8493
2	4.4112
2	1.6325
2	3.0684
2	6.1794
2	4.2961
2	3.8493
2	4.4112
2	1.6325
2	3.0684
2	6.1794
2	4.2961
2	3.8493
2	4.4112
2	1.6325
2	3.0684
2	6.1794
2	4.2961
2	3.8493
2	4.4112
2	1.6325
2	3.0684
2	6.1794
2	4.2961
2	3.8493
2	4.4112
2	1.6325
2	3.0684
2	6.1794
2	4.2961
2	3.8493
2	4.4112
2	1.6325
2	3.0684
2	6.1794
2	4.2961
2	3.8493
2	4.4112
2	1.6325
2	3.0684
2	6.1794
2	4.2961
2	3.8493
2	4.4112
2	1.6325
2	3.0684
2	6.1794
2	4.2961
2	3.8493
2	4.4112
2	1.6325
2	3.0684
2	6.1794
2	4.2961
2	3.8493
2	4.4112
2	1.6325
2	3.0684
2	6.1794
2	4.2961
2	3.8493
2	4.4112
2	1.6325
2	3.0684
2	6.1794
2	4.2961
2	3.8493
2	4.4112
2	1.6325
2	3.0684
2	6.1794
2	4.2961
2	3.8493
2	4.4112
2	1.6325
2	3.0684
2	6.1794
2	4.2961
2	3.8493
2	4.4112
2	1.6325
2	3.0684
2	6.1794
2	4.2961
2	3.8493
2	4.4112
2	1.6325
2	3.0684
2	6.1794
2	4.2961
2	3.8493
2	4.4112
2	1.6325
2	3.0684
2	6.1794
2	4.2961
2	3.8493
2	4.4112
2	1.6325
2	3.0684
2	6.1794
2	4.2961
2	3.8493
2	4.4112
2	1.6325
2	3.0684
2	6.1794
2	4.2961
2	3.8493
2	4.4112
2	1.6325
2	3.0684
2	6.1794
2	4.2961
2	3.8493
2	4.4112
2	1.6325
2	3.0684
2	6.1794
2	4.2961
2	3.8493
2	4.4112
2	1.6325
2	3.0684
2	6.1794
2	4.2961
2	3.8493
2	4.4112
2	1.6325
2	3.0684
2	6.1794
2	4.2961
2	3.8493
2	4.4112
2	1.6325
2	3.0684
2	6.1794
2	4.2961
2	3.8493
2	4.4112
2	1.6325
2	3.0684
2	6.1794
2	4.2961
2	3.8493
3	7.9139
3	6.3738
3	8.6174
3	9.1942
3	5.0804
3	4.7572
3	3.3288
3	5.4878
3	3.3638
3	3.7396
3	4.9313
3	10.192
3	6.5862
3	6.0058
3	4.5348
3	6.3194
3	5.9969
3	4.1855
3	4.4883
3	6.3107
3	11.673
3	6.4479
3	6.4405
3	8.6435
3	4.082
3	3.7193
3	3.5988
3	6.3407
3	5.7934
3	4.0205
3	6.4013
3	5.4592
3	4.5287
3	6.0544
3	2.2201
3	2.7523
3	8.0638
3	6.2919
3	4.2564
3	4.2965
3	4.5239
3	4.8816
3	2.5391
3	7.0938
3	3.9187
3	3.8765
3	2.978
3	8.6647
3	2.2404
3	8.1275
3	5.0855
3	4.6716
3	6.0757
3	8.6033
3	6.9889
3	7.4134
3	3.9585
3	8.1105
3	5.1774
3	4.8844
3	2.3488
3	2.4667
3	5.2446
3	5.4278
3	5.2076
3	6.5562
3	6.4238
3	6.2005
3	9.3176
3	7.5378
3	7.6606
3	9.8426
3	4.8098
3	5.725
3	3.7884
3	2.2082
3	4.0227
3	6.0262
3	6.816
3	5.6242
3	3.3665
3	10.103
3	3.2763
3	6.816
3	5.6242
3	3.3665
3	10.103
3	3.2763
3	6.816
3	5.6242
3	3.3665
3	10.103
3	3.2763
3	6.816
3	5.6242
3	3.3665
3	10.103
3	3.2763
3	6.816
3	5.6242
3	3.3665
3	10.103
3	3.2763
3	6.816
3	5.6242
3	3.3665
3	10.103
3	3.2763
3	6.816
3	5.6242
3	3.3665
3	10.103
3	3.2763
3	6.816
3	5.6242
3	3.3665
3	10.103
3	3.2763
3	6.816
3	5.6242
3	3.3665
3	10.103
3	3.2763
3	6.816
3	5.6242
3	3.3665
3	10.103
3	3.2763
3	6.816
3	5.6242
3	3.3665
3	10.103
3	3.2763
3	6.816
3	5.6242
3	3.3665
3	10.103
3	3.2763
3	6.816
3	5.6242
3	3.3665
3	10.103
3	3.2763
3	6.816
3	5.6242
3	3.3665
3	10.103
3	3.2763
3	6.816
3	5.6242
3	3.3665
3	10.103
3	3.2763
3	6.816
3	5.6242
3	3.3665
3	10.103
3	3.2763
3	6.816
3	5.6242
3	3.3665
3	10.103
3	3.2763
3	6.816
3	5.6242
3	3.3665
3	10.103
3	3.2763
3	6.816
3	5.6242
3	3.3665
3	10.103
3	3.2763
3	6.816
3	5.6242
3	3.3665
3	10.103
3	3.2763
3	6.816
3	5.6242
3	3.3665
3	10.103
3	3.2763
3	6.816
3	5.6242
3	3.3665
3	10.103
3	3.2763
3	6.816
3	5.6242
3	3.3665
3	10.103
3	3.2763
3	6.816
3	5.6242
3	3.3665
3	10.103
3	3.2763
3	6.816
3	5.6242
3	3.3665
3	10.103
3	3.2763
3	6.816
3	5.6242
3	3.3665
3	10.103
3	3.2763
3	6.816
3	5.6242
3	3.3665
3	10.103
3	3.2763
3	6.816
3	5.6242
3	3.3665
3	10.103
3	3.2763
3	6.816
3	5.6242
3	3.3665
3	10.103
3	3.2763
3	6.816
3	5.6242
3	3.3665
3	10.103
3	3.2763
3	6.816
3	5.6242
3	3.3665
3	10.103
3	3.2763
3	6.816
3	5.6242
3	3.3665
3	10.103
3	3.2763
3	6.816
3	5.6242
3	3.3665
3	10.103
3	3.2763
3	6.816
3	5.6242
3	3.3665
3	10.103
3	3.2763
3	6.816
3	5.6242
3	3.3665
3	10.103
3	3.2763
3	6.816
3	5.6242
3	3.3665
3	10.103
3	3.2763
3	6.816
3	5.6242
3	3.3665
3	10.103
3	3.2763
3	6.816
3	5.6242
3	3.3665
3	10.103
3	3.2763
3	6.816
3	5.6242
3	3.3665
3	10.103
3	3.2763
3	6.816
3	5.6242
3	3.3665
3	10.103
3	3.2763
3	6.816
3	5.6242
3	3.3665
3	10.103
3	3.2763
3	6.816
3	5.6242
3	3.3665
3	10.103
3	3.2763
3	6.816
3	5.6242
3	3.3665
3	10.103
3	3.2763
3	6.816
3	5.6242
3	3.3665
3	10.103
3	3.2763
3	6.816
3	5.6242
3	3.3665
3	10.103
3	3.2763
3	6.816
3	5.6242
3	3.3665
3	10.103
3	3.2763
3	6.816
3	5.6242
3	3.3665
3	10.103
3	3.2763
4	5.7613
4	8.8861
4	5.5809
4	6.916
4	6.4445
4	4.481
4	4.6475
4	5.8411
4	6.4794
4	8.0978
4	3.4898
4	8.5316
4	6.9392
4	7.1309
4	4.628
4	4.3845
4	5.2322
4	4.8625
4	6.0407
4	5.6242
4	10.941
4	6.6693
4	10.949
4	5.8479
4	4.1761
4	1.6258
4	6.5994
4	5.8872
4	3.6196
4	4.551
4	6.787
4	7.2025
4	8.591
4	5.1361
4	6.2633
4	8.3334
4	9.3337
4	6.7174
4	5.8299
4	5.5042
4	5.2214
4	8.8197
4	6.5947
4	5.2158
4	5.5353
4	6.4967
4	6.4406
4	8.2012
4	6.021
4	6.2986
4	3.0855
4	2.4578
4	3.6547
4	5.0964
4	9.1512
4	4.0691
4	7.6931
4	7.1022
4	6.4464
4	10.233
4	6.3582
4	7.8123
4	9.6264
4	5.3809
4	6.4648
4	7.8207
4	5.4398
4	8.136
4	3.1631
4	8.066
4	4.7734
4	5.9361
4	8.0285
4	6.332
4	6.8837
4	3.9952
4	3.5541
4	5.427
4	12.414
4	9.2248
4	5.5173
4	3.1199
4	3.155
4	7.6872
4	5.2661
4	5.3439
4	8.7553
4	5.9088
4	9.6051
4	5.1747
4	4.756
4	8.6914
4	8.3806
4	7.3663
4	3.7173
4	4.8515
4	5.5593
4	5.1674
4	6.6591
4	6.9297
4	4.9304
4	4.8416
4	5.467
4	6.9104
4	12.287
4	6.2383
4	4.4974
4	6.7508
4	3.7944
4	8.5284
4	8.8692
4	6.3889
4	6.2742
4	5.782
4	3.3403
4	3.9979
4	6.8948
4	6.7558
4	5.4095
4	3.9768
4	12.461
4	4.9351
4	13.237
4	6.1946
4	4.4036
4	8.0374
4	8.366
4	10.318
4	6.2932
4	4.5224
4	4.5383
4	5.9146
4	6.7587
4	5.112
4	4.8353
4	6.8224
4	6.0393
4	10.749
4	3.551
4	2.5201
4	6.1025
4	4.7339
4	4.7918
4	4.7002
4	5.9364
4	5.5968
4	4.7044
4	6.6096
4	6.333
4	8.4105
4	7.4561
4	6.0006
4	6.5723
4	7.5483
4	6.6989
4	9.6036
4	5.8526
4	5.7386
4	5.8773
4	6.9469
4	6.3468
4	6.2388
4	8.6193
4	6.833
4	9.3611
4	10.51
4	6.9904
4	5.7083
4	8.5115
4	5.2549
4	6.7642
4	3.7994
4	1.6278
4	4.4993
4	8.5998
4	8.3139
4	3.1761
4	8.2238
4	6.4681
4	5.2783
4	3.9186
4	4.7233
4	4.6274
4	4.7444
4	5.2364
4	7.228
4	8.5084
4	5.2206
4	6.0639
4	6.239
4	9.0964
4	9.2799
4	3.5729
4	4.3139
4	9.5778
4	4.6634
4	6.6956
4	6.2597
4	4.9838
4	6.3597
4	4.6634
4	6.6956
4	6.2597
4	4.9838
4	6.3597
4	9.3401
4	2.9959
4	3.9237
4	7.4392
4	4.1725
4	10.672
4	6.2882
4	7.0912
4	11.792
4	4.02
4	5.5859
4	7.5427
4	11.759
4	4.5412
4	3.2846
4	9.5712
4	7.4631
4	3.4368
4	8.093
4	7.0732
4	4.0201
4	6.0869
4	7.7568
4	6.7563
4	12.584
4	3.8657
4	3.5983
4	7.9482
4	6.0296
4	3.0455
4	4.457
4	5.8887
4	4.6542
4	12.638
4	4.8868
4	4.8928
4	9.5246
4	4.4378
4	9.2773
4	5.5651
4	4.4989
4	10.235
4	7.0243
4	7.0608
4	3.0247
4	5.6032
4	6.4298
4	7.3171
4	5.4396
4	4.9218
4	7.0671
4	7.4554
4	8.2643
4	4.0514
4	7.7032
4	10.624
4	5.9348
4	9.2302
4	3.7647
4	9.9193
4	5.7269
4	3.1724
4	8.5894
4	7.5103
4	6.4688
4	3.7397
4	9.4085
4	7.7876
4	10.427
4	6.4136
4	12.187
4	4.0612
4	3.6824
4	5.3372
4	6.3397
4	8.3208
4	4.044
4	7.6048
4	5.155
4	4.9919
4	7.4666
4	3.7756
4	4.2531
4	5.7973
4	6.6356
4	10.863
4	7.7368
4	3.7879
4	4.8843
4	5.9755
4	5.5921
4	5.9021
4	4.0517
4	8.9806
4	4.5661
4	4.9715
4	6.1318
4	12.145
4	6.0788
4	4.5939
4	6.7391
4	6.0078
4	8.2393
4	8.4586
4	4.778
4	5.8831
4	4.4766
4	2.3648
4	4.8605
4	6.7394
4	5.1383
4	6.472
4	4.1422
4	7.3417
4	6.9189
4	4.4088
4	4.9042
4	5.7552
4	5.8358
4	5.0731
4	10.191
4	7.9157
4	5.1882
4	5.2356
4	8.428
4	12.637
4	3.3077
5	5.3852
5	3.7897
5	9.0409
5	4.7475
5	3.6629
5	4.9737
5	6.4095
5	4.4826
5	4.2475
5	6.3449
5	6.5958
5	5.2128
5	4.8427
5	12.769
5	4.6425
5	4.7147
5	8.1104
5	7.4811
5	4.5443
5	3.3737
5	5.6242
5	3.3305
5	5.0844
5	4.1753
5	4.2539
5	6.3228
5	7.2081
5	9.019
5	6.2972
5	4.2994
5	6.0294
5	7.0354
5	5.7683
5	6.2999
5	11.77
5	4.3515
5	4.9918
5	4.8161
5	5.4632
5	4.3474
5	4.3179
5	8.6481
5	4.2163
5	8.2192
5	6.9101
5	3.805
5	8.4184
5	5.3415
5	8.4316
5	7.6852
5	2.8635
5	14.338
5	11.086
5	5.4224
5	5.1197
5	9.2042
5	3.9311
5	13.814
5	2.8648
5	4.1623
5	7.8939
5	7.1766
5	3.5982
5	6.1589
5	4.9227
5	8.2275
5	8.2047
5	7.3995
5	4.6355
5	5.1246
5	5.4995
5	7.0285
5	6.5397
5	5.859
5	4.2474
5	6.5434
5	5.1829
5	3.6681
5	5.0471
5	5.3423
5	6.9357
5	5.4989
5	9.564
5	6.2789
5	6.3496
5	6.2901
5	2.9001
5	6.3792
5	4.1758
5	5.0438
5	5.7761
5	3.5342
5	7.3416
5	6.4669
5	5.0457
5	10.176
5	4.4173
5	6.5921
5	4.9765
5	4.3138
5	2.7376
5	9.8173
5	5.9923
5	6.2524
5	4.4897
5	3.0007
5	5.4271
5	7.4118
5	4.211
5	4.1297
5	5.9811
5	6.3354
5	5.0998
5	5.3063
5	7.9873
5	3.7525
5	7.4147
5	5.6651
5	7.6692
5	6.2451
5	6.5592
5	4.235
5	5.9906
5	3.5578
5	6.6686
5	5.0489
5	4.0214
5	7.2824
5	16.661
5	5.4202
5	8.2312
5	3.8076
5	10.158
5	13.071
5	9.7773
5	5.8426
5	4.7754
5	6.3707
5	4.6767
5	7.9592
5	6.693
5	3.2216
5	8.48
5	6.9716
5	4.7315
5	7.1223
5	7.0617
5	3.916
5	6.3684
5	9.9507
5	8.1078
5	5.8707
5	5.3975
5	3.9441
5	10.684
5	5.2513
5	3.4128
5	5.2301
5	9.0207
5	10.851
5	3.9884
5	6.3615
5	6.0572
5	8.8225
5	4.6143
5	10.994
5	3.5586
5	5.8323
5	10.234
5	5.4622
5	7.255
5	6.7876
5	7.8543
5	6.0471
5	2.9031
5	5.3402
5	5.8706
5	6.3993
5	7.8556
5	11.083
5	9.1188
5	5.4134
5	4.4159
5	3.1916
5	4.2934
5	5.4754
5	7.5187
5	11.243
5	7.2299
5	5.3465
5	5.723
5	3.7148
5	4.8128
5	11.451
5	5.9358
5	5.682
5	4.1065
5	8.4377
5	3.4783
5	3.4001
5	5.0143
5	6.1934
5	5.5279
5	8.46
5	7.7638
5	4.0406
5	3.8608
5	9.1379
5	9.1952
5	6.6308
5	9.6529
5	5.649
5	4.7727
5	7.648
5	4.1909
5	1.9922
5	4.9013
5	5.2075
5	6.4256
5	8.3828
5	7.4078
5	9.6908
5	6.8974
5	4.4292
5	2.1079
5	6.3821
5	3.927
5	8.258
5	6.8438
5	6.3442
5	6.785
5	4.763
5	2.0312
5	6.9551
5	7.3572
5	5.0966
5	3.8887
5	7.0303
5	5.1311
5	9.5237
5	14.227
5	6.5248
5	6.2545
5	7.1995
5	4.6905
5	6.2285
5	9.0825
5	4.6041
5	4.2255
5	4.6153
5	2.6904
5	7.9599
5	5.0937
5	5.8851
5	5.8028
5	4.5593
5	8.1219
5	4.9554
5	4.6644
5	5.2756
5	2.5028
5	7.7171
5	13.841
5	5.8126
5	5.938
5	4.6946
5	6.2302
5	12.627
5	5.2192
5	5.6775
5	7.982
5	4.5128
5	6.2201
5	4.1984
5	4.2452
5	3.4738
5	8.672
5	7.8862
5	6.5063
5	7.6417
5	7.3354
5	5.8436
5	13.723
5	6.6619
5	6.4024
5	3.2079
5	4.1953
5	8.7271
5	3.5182
5	7.1159
5	6.6529
5	11.452
5	4.3446
5	4.8928
5	6.867
5	5.4609
5	10.32
5	5.8222
5	9.242
5	7.6208
5	7.1773
5	9.2492
5	6.5725
5	3.0085
5	6.3496
5	4.4417
5	9.2781
5	6.5958
5	4.1409
5	6.5788
5	8.8298
5	4.0714
5	7.4652
5	7.5316
5	5.1562
5	6.5355
5	3.6055
5	4.5998
5	5.0945
5	4.9712
5	6.3013
5	4.424
5	6.6434
5	5.8169
5	3.8508
5	5.6841
5	1.8314
5	5.4047
5	5.0662
5	4.8926
5	5.5714
5	10.19
5	7.7271
5	6.3513
5	3.1094
5	11.92
5	4.6715
5	13.828
5	5.8823
5	3.1796
5	6.8069
5	3.9304
5	6.05
5	6.0705
5	6.8097
5	6.8367
5	2.5337
5	8.4852
5	4.3389
5	5.6931
5	8.9903
5	8.7284
5	12.575
5	4.6208
5	5.1891
5	4.9945
5	11.766
5	2.7458
5	6.6862
5	6.3875
5	8.3352
5	4.8378
5	3.4709
5	4.683
6	7.0038
6	10.168
6	8.8163
6	2.5583
6	7.0838
6	2.6507
6	3.3502
6	5.0979
6	3.5426
6	8.7136
6	3.0095
6	4.0362
6	3.503
6	3.9292
6	3.7904
6	5.3047
6	5.4958
6	5.697
6	5.7511
6	4.4244
6	4.3348
6	7.1362
6	3.3133
6	7.1106
6	3.2794
6	3.4051
6	4.1068
6	4.7647
6	7.2834
6	5.0364
6	6.4521
6	6.4
6	3.5691
6	6.5199
6	5.0933
6	4.0168
6	4.964
6	5.3667
6	5.5085
6	5.1469
6	6.3413
6	8.1688
6	6.8298
6	5.9377
6	4.4769
6	8.1919
6	3.9867
6	4.8671
6	8.5368
6	1.3086
6	5.3728
6	7.5639
6	6.6983
6	6.6492
6	7.0436
6	5.9625
6	5.5557
6	2.7814
6	6.6344
6	3.1602
6	7.0914
6	5.3125
6	5.903
6	3.8681
6	4.0345
6	3.9356
6	5.2406
6	5.4811
6	5.2486
6	3.2111
6	4.049
6	5.0543
6	9.0813
6	7.4815
6	5.5944
6	2.6808
6	2.8103
6	4.84
6	3.2357
6	3.3454
6	4.3924
6	2.1836
6	2.8839
6	5.8121
6	5.0661
6	5.054
6	5.5784
6	6.1805
6	4.9086
6	3.3989
6	2.3477
6	4.2952
6	2.6911
6	5.812
6	7.3283
6	4.516
6	7.1808
6	4.0479
6	9.7404
6	4.925
6	3.7064
6	3.6366
6	9.1067
6	10.876
6	5.5427
6	3.336
6	5.4465
6	4.2252
6	9.2743
6	4.0365
6	3.7797
6	6.7554
6	2.199
6	2.3741
6	5.2053
6	5.2362
6	4.3679
6	6.7553
6	10.708
6	6.2777
6	2.3788
7	9.1044
7	10.564
7	3.729
7	7.569
7	5.9751
7	6.0926
7	5.222
7	11.046
7	4.4841
7	4.7365
7	4.6246
7	13.468
7	7.5356
7	5.1646
7	9.1132
7	9.9794
7	7.1353
7	8.3569
7	4.3081
7	9.6997
7	11.199
7	4.4239
7	6.9811
7	9.613
7	9.1236
7	6.6709
7	5.3124
7	6.5064
7	4.7868
7	2.8881
7	4.1511
7	4.2809
7	6.9889
7	7.3726
7	4.6813
7	6.583
7	1.8563
7	3.3637
7	8.7189
7	5.4465
7	6.2847
7	1.7774
7	10.022
7	7.4809
7	6.1243
7	7.7639
7	4.015
7	5.7666
7	3.2793
7	6.5215
7	5.9051
7	6.538
7	7.4462
7	5.6725
7	6.5748
7	6.3049
7	6.0117
7	5.0367
7	4.687
7	5.6684
7	3.4661
7	9.9624
7	5.2246
7	3.3821
7	4.6012
7	6.3771
7	4.9787
7	4.323
7	6.3378
7	3.4477
7	8.4945
7	6.6207
7	2.4058
7	5.1857
7	4.6892
7	8.2859
7	10.012
7	7.3667
7	9.0207
7	7.443
7	5.7277
7	6.913
7	6.0815
7	3.0028
7	7.0842
7	6.0243
7	12.493
7	6.6922
7	6.5346
7	3.7646
7	5.0202
7	8.6329
7	4.7908
7	5.6112
7	7.3777
7	3.9523
7	4.6589
7	7.2085
7	4.5393
7	7.9523
7	4.5374
7	3.842
7	2.0098
7	5.9787
7	6.3231
7	6.2368
7	8.0388
7	2.8492
7	6.2838
7	7.009
7	4.6791
7	7.2683
7	6.5563
7	3.2119
7	8.0566
7	4.8611
7	8.8456
7	5.5031
7	5.613
7	4.4393
7	5.4434
7	3.656
7	4.0463
7	5.2405
7	4.3112
7	9.3932
7	6.562
7	10.639
7	5.4339
7	4.8251
7	6.9636
7	7.3886
7	6.5714
7	7.6915
7	4.8774
7	5.8904
7	4.2299
7	8.3085
7	5.3592
7	4.0597
7	3.918
7	3.4549
7	3.3768
7	5.703
7	6.0024
7	9.0769
7	5.2152
7	7.5885
7	4.614
7	12.729
7	4.8333
7	5.5351
7	3.8941
7	9.2684
7	6.0144
7	8.0824
7	5.6606
7	4.5043
7	3.5355
7	7.3621
7	3.9111
7	7.3814
7	7.2172
7	4.997
7	6.0782
7	14.155
7	5.8543
7	5.2906
7	2.7249
7	4.222
7	5.6698
7	4.8561
7	3.879
7	7.4713
7	6.8781
7	4.7176
7	6.5506
7	5.85
7	4.248
7	7.128
7	3.1209
7	9.0306
7	6.1947
7	7.8497
7	5.8208
7	4.9181
7	10.597
7	6.5069
7	3.4826
7	6.4187
7	6.5585
7	3.6707
7	5.3027
7	7.1086
7	7.5329
7	7.8883
7	3.5202
7	3.2349
7	7.0013
7	4.8692
7	4.0559
7	4.4035
7	5.1756
7	7.5076
7	5.059
7	6.3447
7	5.5616
7	11.911
7	5.7236
7	6.7644
7	5.9609
7	5.1187
7	4.3104
7	7.0128
7	7.7587
7	5.6319
7	6.4439
7	4.0316
7	6.4931
7	6.8521
7	4.4796
7	6.3068
7	7.9269
7	3.0507
7	5.4555
7	3.9012
7	5.2659
7	3.423
7	6.4817
7	5.7496
7	4.7955
7	7.2989
7	5.3076
7	4.3408
7	2.9589
7	8.222
7	5.6108
7	3.603
7	5.0191
7	5.0959
7	6.9386
7	10.27
7	4.0691
7	5.9754
7	4.1827
7	5.4171
7	3.666
7	8.426
7	4.6026
7	5.7027
7	7.5419
7	6.8453
7	7.6003
7	8.0322
7	5.1063
7	2.0879
8	6.1554
8	6.1879
8	11.059
8	3.5212
8	4.7791
8	11.26
8	10.658
8	7.4819
8	5.8909
8	4.8493
8	7.5629
8	10.551
8	6.733
8	3.5382
8	8.2079
8	8.6025
8	2.5197
8	3.6882
8	4.8858
8	2.0547
8	5.0875
8	7.0898
8	3.5897
8	5.183
8	7.1689
8	3.0375
8	6.5874
8	2.3629
8	7.4601
8	7.6234
8	9.1606
8	5.1803
8	6.7172
8	5.661
8	10.581
8	4.7512
8	4.9367
8	10.994
8	7.0398
8	10.146
8	4.1025
8	4.9255
8	5.7911
8	6.9194
8	4.2233
8	2.7352
8	4.2406
8	4.7439
8	10.701
8	6.647
8	2.8392
8	5.618
8	5.3054
8	4.8693
8	4.2531
8	3.2778
8	4.0933
8	5.8145
8	4.6717
8	5.8392
8	6.1646
8	7.2684
8	4.4177
8	3.9653
8	5.8152
8	6.8265
8	7.5552
[truncated: 528 more rows]
