# Supplementary material for: How human runners regulate footsteps on uneven terrain
Source: eLife journal article supplement (doi:10.7554/elife.67177), 2023-02-22
Supplement: supp [file elife-67177-supp-v1.zip › elife_poa_e67177_Figure_5_source_data_6.csv]

Measured footsteps - Uneven II
subject	inter_quartile_range_of_terrain_height_units_mm
1	14.927
1	7.5301
1	10.554
1	11.504
1	13.351
1	5.5402
1	11.675
1	7.935
1	6.4996
1	8.8863
1	5.9869
1	12.545
1	7.4379
1	15.603
1	20.854
1	4.2644
1	5.9992
1	8.1616
1	1.4825
1	3.6869
1	8.1708
1	2.1509
1	7.4919
1	11.54
1	5.2897
1	6.1844
1	3.0317
1	5.7166
1	8.6151
1	11.269
1	18.123
1	9.4299
1	14.573
1	6.6047
1	9.0266
1	7.3628
1	11.668
1	10.376
1	9.9032
1	11.231
1	9.2588
1	20.661
1	6.222
1	3.6703
1	9.4135
1	9.6571
1	12.684
1	8.0708
1	11.998
1	5.659
1	7.334
1	5.5706
1	5.5108
1	11.806
1	4.4807
1	3.4686
1	7.0879
1	15.059
1	6.1012
1	6.066
1	10.93
1	13.008
1	8.8263
1	3.6063
1	4.7779
1	6.2638
1	14.809
1	8.224
1	3.773
1	5.3368
1	8.4541
1	5.5672
1	8.1922
1	6.9587
1	10.388
1	8.7102
1	7.527
1	1.6334
1	4.2977
1	3.572
1	10.586
1	8.4974
1	10.014
1	8.1855
1	7.5531
1	4.1604
1	3.1356
1	6.1365
1	9.1143
1	10.32
1	7.4627
1	4.0758
1	8.2842
1	6.8461
1	13.97
1	10.197
1	6.6425
1	13.785
1	8.1677
1	7.7275
1	12.077
1	5.5044
1	6.0546
1	6.7176
1	7.3145
1	7.473
1	4.8317
1	8.4516
1	2.3066
1	19.748
1	7.1654
1	9.4535
1	6.5725
1	5.1502
1	7.8036
1	7.7431
1	7.8285
1	10.149
1	3.4019
1	13.146
1	5.7414
1	8.7591
1	4.3367
1	9.6715
1	6.8016
1	8.653
1	4.7414
1	8.1934
1	8.06
1	7.8116
1	5.9842
1	6.891
1	10.56
1	9.5146
1	7.3136
1	5.4421
1	5.152
1	7.892
1	12.096
1	8.8467
1	3.6416
1	7.3545
1	7.9314
1	8.6584
1	9.9325
1	8.743
1	7.5686
1	5.3223
1	9.8634
1	2.572
1	3.0126
1	7.7338
1	13.516
1	6.6709
1	4.5625
1	6.9763
1	5.7503
1	5.1871
1	5.0903
1	14.824
1	7.1256
1	7.2128
1	15.21
1	4.4525
1	5.3548
1	8.17
1	8.5914
1	10.9
1	10.35
1	7.4426
1	11.246
1	6.12
1	6.3204
1	8.2012
1	9.3036
1	10.842
1	6.6168
1	10.812
1	8.3579
1	5.0526
1	14.471
1	10.73
1	5.6871
1	12.136
1	7.4805
1	14.599
1	9.5349
1	10.205
1	5.5066
1	8.1574
1	7.1295
1	5.8796
1	7.1969
1	9.7274
1	15.685
1	6.144
1	12.455
1	10.394
1	8.2031
1	8.2364
1	8.8331
1	9.9004
1	10.845
1	6.8996
1	9.2644
1	7.7443
1	4.9653
1	7.8053
1	12.622
1	8.1528
1	6.9871
1	8.9763
1	5.7435
1	7.1827
1	14.547
1	13.708
1	9.9527
1	6.3912
1	15.646
1	19.552
1	6.1934
1	6.4034
1	5.2311
1	8.4235
1	8.6633
1	4.5215
1	8.0877
1	8.4405
1	7.0714
1	2.3623
1	6.5103
1	8.1132
1	11.7
1	5.7305
1	6.3388
1	3.0779
1	4.2963
1	8.5303
1	7.45
1	11.826
1	6.9622
1	6.9954
1	7.3677
1	14.515
1	7.4359
1	4.139
1	13.693
1	10.333
1	12.26
1	6.7975
1	13.136
1	8.4535
1	1.8974
1	8.2108
1	7.5362
1	7.4822
1	7.2626
1	6.9524
1	10.952
1	9.0465
1	8.0327
1	2.967
1	8.371
1	5.8102
1	12.304
1	8.5434
1	11.733
1	7.7293
1	6.199
1	8.687
1	5.878
1	7.613
1	7.7544
1	8.9538
1	5.2527
1	3.3459
1	7.678
1	6.5015
1	14.233
1	11.449
1	3.6237
1	6.6901
1	1.3316
1	10.126
1	10.58
1	7.8531
1	6.2915
2	5.7197
2	3.5611
2	5.8204
2	7.1473
2	3.672
2	11.036
2	8.0106
2	5.2184
2	7.9003
2	13.387
2	10.371
2	10.257
2	9.5133
2	6.8844
2	13.984
2	8.8297
2	5.3105
2	14.358
2	4.8166
2	6.9845
2	4.729
2	9.0971
2	3.8458
2	12.167
2	11.369
2	6.2289
2	5.4395
2	10.687
2	11.198
2	15.842
2	5.5765
2	9.2493
2	13.101
2	3.4485
2	10.022
2	6.1373
2	13.294
2	9.6024
2	7.0462
2	7.1122
2	8.3161
2	8.7056
2	5.1605
2	10.212
2	8.7217
2	7.1619
2	4.9163
2	5.8434
2	1.6575
2	11.113
2	6.6301
2	8.8296
2	10.283
2	7.2416
2	12.417
2	11.755
2	9.029
2	5.2204
2	11.751
2	5.3388
2	6.3934
2	3.6802
2	5.3576
2	4.7288
2	13.242
2	13.366
2	6.3438
2	9.6096
2	6.3552
2	6.3797
2	5.055
2	11.401
2	6.0938
2	10.079
2	5.6298
2	5.2719
2	7.8441
2	3.407
2	12.556
2	10.685
2	8.7995
2	3.827
2	6.1219
2	5.1631
2	5.1985
2	10.202
2	11.008
2	4.6815
2	10.885
2	7.6862
2	12.513
2	15.927
2	9.6435
2	9.8298
2	9.6533
2	4.0296
2	5.135
2	7.3727
2	9.1488
2	2.7092
2	8.8799
2	12.327
2	13.598
2	9.2476
2	8.1106
2	7.1894
2	1.6844
2	7.0387
2	6.8594
2	2.9196
2	10.737
2	15.865
2	6.3594
2	3.6199
2	6.94
2	8.3548
2	4.8103
2	6.1961
2	3.9346
2	8.8688
2	11.545
2	7.014
2	9.5251
2	5.8057
2	5.3496
2	6.8123
2	7.2559
2	13.089
2	3.814
2	15.48
2	5.8023
2	5.3084
2	6.7624
2	10.067
2	9.9581
2	5.0653
2	9.0821
2	4.4116
2	8.6199
2	8.0196
2	10.283
2	4.4116
2	8.6199
2	8.0196
2	10.283
2	7.1489
2	8.837
2	10.982
2	6.6522
2	12.675
2	5.7955
2	15.528
2	10.212
2	7.7075
2	5.4121
2	7.6144
2	4.3782
2	15.424
2	5.8949
2	8.317
2	11.434
2	4.9419
2	7.9326
2	1.4851
2	7.4892
2	6.2783
2	14.049
2	8.0604
2	14.132
2	7.2579
2	7.1109
2	5.0758
2	9.4561
2	10.717
2	5.3077
2	10.19
2	7.2479
2	7.452
2	6.1514
2	5.1192
2	3.8692
2	8.2227
2	12.679
2	10.43
2	11.753
2	5.4235
2	9.9202
2	7.9703
2	7.8258
2	5.609
2	10.038
2	4.1147
2	6.6384
2	5.1469
2	10.376
2	5.096
2	2.0733
2	15.464
2	9.8014
2	12.252
2	7.3928
2	10.413
2	8.0262
2	5.6188
2	4.5731
2	12.89
2	3.6561
2	13.228
2	7.997
2	6.8286
2	2.3896
2	6.4818
2	14.216
2	8.0177
2	7.3392
2	14.403
2	1.3275
2	12.349
2	11.012
2	4.126
2	3.4055
2	12.261
2	7.507
2	15.808
2	4.5189
2	13.795
2	10.206
2	13.82
2	17.459
2	8.7638
2	5.9862
2	4.2242
2	10.122
2	6.3577
2	6.7595
2	6.8963
2	7.7309
2	10.177
2	7.5602
2	7.4353
2	8.485
2	6.8168
2	4.2494
2	13.19
2	9.7679
2	5.0691
2	7.483
2	5.2187
2	8.4842
2	5.8646
2	6.7655
2	21.636
2	6.357
2	5.8684
2	8.2861
2	15.641
2	8.623
2	6.2673
2	5.6372
2	9.1351
2	5.7757
2	15.739
2	5.8304
2	6.1421
2	1.65
2	6.924
2	12.17
2	14.824
2	5.3886
2	4.7603
2	12.492
2	6.611
2	15.143
2	2.5654
2	3.7546
2	8.4416
2	2.1297
2	12.214
2	6.2716
2	5.1698
2	8.0238
2	16.484
2	11.675
2	7.4059
2	9.9974
2	7.641
2	3.7127
2	6.5762
2	6.8507
2	11.224
2	6.305
2	3.9374
2	8.5536
2	4.2849
2	6.6021
2	4.0583
2	8.589
2	7.3867
2	9.0068
2	5.6599
2	9.6397
2	6.1486
3	8.2754
3	11.173
3	6.6101
3	9.1245
3	3.8829
3	5.5105
3	5.9233
3	4.8648
3	13.045
3	4.8084
3	4.1134
3	6.0509
3	4.8473
3	4.8835
3	5.8514
3	11.17
3	5.4302
3	4.0989
3	13.793
3	7.2827
3	7.2675
3	9.1701
3	4.4334
3	5.3222
3	7.7866
3	3.8395
3	6.111
3	13.521
3	9.84
3	9.3148
3	7.2005
3	8.4149
3	5.0446
3	5.0927
3	7.1052
3	2.4562
3	5.5347
3	5.2859
3	12.411
3	2.7814
3	6.268
3	7.5489
3	7.0178
3	8.2923
3	5.0732
3	8.4908
3	14.854
3	6.1731
3	2.9051
3	8.3258
3	5.2494
3	12.132
3	5.703
3	2.4843
3	10.248
3	3.7946
3	6.1981
3	6.4042
3	7.3974
3	8.9122
3	12.263
3	5.927
3	5.8174
3	4.7172
3	7.9417
3	11.65
3	10.057
3	10.877
3	6.3098
3	9.094
3	7.7153
3	12.128
3	8.2052
3	5.7859
3	7.0122
3	9.5276
3	5.4364
3	3.7587
3	1.184
3	7.7289
3	6.4471
3	3.1198
3	3.848
3	6.4528
3	2.9741
3	8.8897
3	4.5812
3	3.1898
3	8.2539
3	5.8838
3	9.3997
3	9.6734
3	6.6241
3	18.828
3	6.6218
3	6.4316
3	12.477
3	2.6358
3	6.5415
3	5.3179
3	6.2602
3	9.3835
3	6.8163
3	4.0369
3	7.5649
3	12.418
3	6.0118
3	18.604
3	14.318
3	10.145
3	5.7273
3	13.857
3	12.296
3	7.5883
3	7.1406
3	9.4176
3	4.4381
3	2.5348
3	3.5371
3	8.4257
3	3.1389
3	4.2198
3	13.06
3	8.4386
3	3.8329
3	8.7926
3	9.1953
3	2.6404
3	3.7022
3	4.4998
3	15.28
3	13.023
3	11.451
3	6.6316
3	9.6176
3	3.1015
3	0.86393
3	14.69
3	3.2984
3	2.687
3	9.9065
3	12.854
3	8.316
3	7.7242
3	14.53
3	6.5203
3	3.0488
3	2.6099
3	8.7084
3	15.204
3	7.8185
3	3.9434
3	8.5662
3	4.7101
3	10.024
3	4.1498
3	6.3663
3	12.023
3	7.5853
3	7.0348
3	11.353
3	5.6188
3	11.152
3	5.4613
3	5.8247
3	14.199
3	4.4744
3	3.9319
3	9.1975
3	11.912
3	5.9411
3	6.8438
3	14.486
3	9.5704
3	8.0768
3	3.945
3	16.686
3	5.3493
3	19.308
3	14.116
3	5.071
3	19.4
3	6.2558
3	5.0972
3	4.6087
3	5.5564
3	8.2957
3	9.3623
3	6.4562
3	8.1558
3	5.0774
3	12.504
3	12.528
3	6.5667
3	7.6873
3	3.9866
3	10.426
3	4.9719
3	20.109
3	12.482
3	2.0881
3	4.4605
3	5.3252
3	11.936
3	7.8075
3	2.8836
3	11.479
3	5.9684
3	7.3114
3	9.6164
3	17.138
3	6.8164
3	8.887
3	9.4776
3	5.7093
3	5.4834
3	5.289
3	4.1307
3	6.6702
3	3.8792
3	9.9804
3	5.0987
3	5.3727
3	7.9673
3	13.362
3	6.501
3	5.5795
3	12.263
3	6.9157
3	2.3558
3	3.5279
3	8.1743
3	4.6691
3	7.13
3	6.2253
3	4.375
3	5.6483
3	14.599
3	5.847
3	12.55
3	5.6657
3	15.425
3	12.373
3	9.2793
3	14.276
3	8.5509
3	9.1013
3	10.392
3	11.154
3	6.2156
3	7.7901
3	5.8031
3	9.6
3	5.9489
3	6.95
3	10.448
3	7.3923
3	3.6295
3	5.3385
3	4.2487
3	8.5506
3	11.454
3	1.6565
3	8.9232
3	13.936
3	6.6427
3	5.5989
3	13.919
3	8.6646
3	7.5974
3	6.5847
3	8.8472
3	6.869
3	4.5603
3	6.6754
3	3.1042
3	8.3494
3	5.3725
3	8.8437
3	7.4301
3	7.4
3	7.0038
3	8.0362
3	4.927
3	13.316
3	9.971
4	5.234
4	6.0024
4	7.6094
4	4.1442
4	7.213
4	8.584
4	7.7738
4	4.928
4	2.8518
4	4.0467
4	10.272
4	5.2105
4	5.7521
4	14.168
4	9.1408
4	4.7125
4	3.3933
4	10.105
4	10.889
4	2.4576
4	11.912
4	5.2882
4	4.7904
4	15.926
4	5.8859
4	9.5991
4	12.072
4	9.8801
4	5.9948
4	8.8869
4	1.7004
4	12.932
4	10.233
4	9.3106
4	9.8038
4	4.1713
4	4.5776
4	19.461
4	8.1137
4	8.7014
4	6.8699
4	3.4793
4	7.0655
4	6.1571
4	8.1552
4	8.9453
4	7.6172
4	7.006
4	11.923
4	8.1321
4	7.1471
4	17.231
4	10.522
4	8.1013
4	7.7235
4	14.681
4	9.2137
4	2.5129
4	8.5419
4	4.1377
4	10.746
4	9.1609
4	7.5758
4	18.17
4	5.2181
4	8.6719
4	8.0793
4	5.6958
4	10.435
4	7.215
4	11.022
4	11.218
4	2.0005
4	6.3918
4	13.074
4	9.9316
4	8.2521
4	13.133
4	7.4544
4	6.1147
4	14.164
4	6.028
4	6.8269
4	12.162
4	4.3402
4	5.4806
4	6.9714
4	8.92
4	6.1513
4	10.057
4	7.2264
4	3.9545
4	4.1774
4	8.6169
4	7.3938
4	4.5268
4	6.257
4	17.469
4	3.6038
4	8.2597
4	2.2672
4	4.6242
4	6.5718
4	4.0183
4	7.4405
4	5.4598
4	18.46
4	8.6405
4	7.0574
4	9.1057
4	9.7893
4	15.764
4	6.199
4	2.492
4	12.689
4	6.0522
4	6.3412
4	8.9423
4	9.9458
4	6.7331
4	6.6996
4	4.0607
4	10.231
4	16.704
4	11.004
4	11.848
4	4.6806
4	4.4187
4	12.928
4	5.2928
4	2.7191
4	6.1533
4	7.5851
4	10.549
4	16.612
4	13.548
4	10.747
4	9.7552
4	4.9028
4	15.527
4	2.2695
4	9.5871
4	14.671
4	5.7753
4	12.591
4	7.9501
4	9.6766
4	11.136
4	6.8777
4	10.539
4	15.581
4	8.7276
4	8.0349
4	9.8928
4	4.9438
4	13.005
4	11.457
4	11.019
4	5.2803
4	7.9718
4	6.0482
4	6.602
4	3.3407
4	4.6833
4	4.9686
4	9.4633
4	5.7781
4	7.5056
4	7.3054
4	6.0431
4	10.422
4	7.1889
4	6.2539
4	5.2015
4	3.7331
4	3.7482
4	6.8862
4	3.7088
4	8.3768
4	7.6334
4	7.5903
4	3.2471
4	7.1139
4	3.4633
4	5.3075
4	6.2089
4	9.1502
4	13.12
4	7.1368
4	7.2452
4	10.096
4	7.3326
4	6.9436
4	8.675
4	12.843
4	7.3113
4	6.8171
4	7.4032
4	4.0404
4	4.057
4	8.3338
4	12.643
4	2.3126
4	5.2151
4	4.4193
4	4.2579
4	14.224
4	12.411
4	12.366
4	6.1022
4	5.8737
4	6.3321
4	8.9522
4	8.9522
4	7.8011
4	9.337
4	4.7244
4	8.8711
4	7.9485
4	12.32
4	10.128
4	6.447
4	9.6685
4	12.205
4	5.2731
4	7.2923
4	7.0954
4	5.2244
4	11.476
4	19.283
4	6.4157
4	10.537
4	6.9743
4	7.7774
4	5.1051
4	11.206
4	6.4018
4	3.4555
4	5.2514
4	7.0195
4	7.6618
4	4.595
4	4.7838
4	6.3459
4	8.0505
4	9.3815
4	16.148
4	3.7661
4	7.584
4	7.7818
4	7.8442
4	7.641
4	12.821
4	6.5264
4	12.619
4	14.589
4	11.311
4	4.5995
4	9.6521
4	5.5606
4	11.876
4	10.316
4	6.2673
4	4.9662
4	7.5017
4	7.2775
4	4.5458
4	4.6494
4	6.2328
4	11.278
4	8.6526
4	7.7101
4	5.6294
4	3.3416
4	8.5451
4	3.1844
4	10.867
4	5.6769
4	7.7105
4	7.5928
4	6.5209
4	6.0655
4	12.639
4	10.245
4	6.7211
4	5.5228
4	5.878
4	5.1168
4	6.2987
4	4.1368
4	8.9386
4	3.0265
4	12.813
4	14.276
4	12.66
4	7.1124
4	9.9318
4	5.9692
4	8.1836
4	1.0476
4	3.4201
4	9.5103
4	5.3548
4	10.568
4	6.9314
4	7.4637
4	8.0385
4	1.3199
4	15.078
4	10.157
4	5.8467
4	19.389
4	4.2704
4	10.261
4	5.7441
4	6.2442
4	9.9434
4	6.5636
4	10.049
4	7.1637
4	1.9034
4	8.3556
4	17.326
4	4.2227
4	3.9971
4	14.513
4	7.0734
4	8.2386
4	13.687
4	7.7848
4	11.191
4	2.4389
4	12.561
4	4.4525
4	20.622
4	9.6476
4	7.202
4	8.868
4	8.1967
4	7.6849
4	4.2247
4	8.9162
4	10.927
4	8.0617
5	12.853
5	8.8884
5	6.0214
5	13.903
5	11.039
5	8.2489
5	8.0585
5	8.5009
5	7.9203
5	1.8227
5	6.9567
5	10.068
5	16.278
5	7.988
5	7.2636
5	9.271
5	5.3547
5	6.6606
5	5.0421
5	9.4811
5	9.4852
5	8.1666
5	13.906
5	4.9682
5	5.4863
5	7.5111
5	7.2497
5	7.7557
5	5.5987
5	2.5726
5	7.5111
5	7.2497
5	7.7557
5	5.5987
5	2.5726
5	7.5111
5	7.2497
5	7.7557
5	5.5987
5	2.5726
5	7.5111
5	7.2497
5	7.7557
5	5.5987
5	2.5726
5	7.5111
5	7.2497
5	7.7557
5	5.5987
5	2.5726
5	7.5111
5	7.2497
5	7.7557
5	5.5987
5	2.5726
5	7.5111
5	7.2497
5	7.7557
5	5.5987
5	2.5726
5	7.5111
5	7.2497
5	7.7557
5	5.5987
5	2.5726
5	7.5111
5	7.2497
5	7.7557
5	5.5987
5	2.5726
5	7.5111
5	7.2497
5	7.7557
5	5.5987
5	2.5726
5	7.5111
5	7.2497
5	7.7557
5	5.5987
5	2.5726
5	7.5111
5	7.2497
5	7.7557
5	5.5987
5	2.5726
5	9.751
5	13.527
5	9.7901
5	9.7094
5	12.015
5	5.2472
5	8.9606
5	7.8715
5	7.063
5	5.2472
5	8.9606
5	7.8715
5	7.063
5	5.2472
5	8.9606
5	7.8715
5	7.063
5	5.2472
5	8.9606
5	7.8715
5	7.063
5	5.2472
5	8.9606
5	7.8715
5	7.063
5	5.2472
5	8.9606
5	7.8715
5	7.063
5	5.2472
5	8.9606
5	7.8715
5	7.063
5	5.2472
5	8.9606
5	7.8715
5	7.063
5	5.2472
5	8.9606
5	7.8715
5	7.063
5	5.2472
5	8.9606
5	7.8715
5	7.063
5	5.2472
5	8.9606
5	7.8715
5	7.063
5	5.2472
5	8.9606
5	7.8715
5	7.063
5	5.2472
5	8.9606
5	7.8715
5	7.063
5	15.163
5	5.7771
5	7.603
5	4.3873
5	4.0484
5	15.163
5	5.7771
5	7.603
5	4.3873
5	4.0484
5	15.163
5	5.7771
5	7.603
5	4.3873
5	4.0484
5	15.163
5	5.7771
5	7.603
5	4.3873
5	4.0484
5	15.163
5	5.7771
5	7.603
5	4.3873
5	4.0484
5	15.163
5	5.7771
5	7.603
5	4.3873
5	4.0484
5	15.163
5	5.7771
5	7.603
5	4.3873
5	4.0484
5	15.163
5	5.7771
5	7.603
5	4.3873
5	4.0484
5	15.163
5	5.7771
5	7.603
5	4.3873
5	4.0484
5	15.163
5	5.7771
5	7.603
5	4.3873
5	4.0484
5	15.163
5	5.7771
5	7.603
5	4.3873
5	4.0484
5	15.163
5	5.7771
5	7.603
5	4.3873
5	4.0484
5	15.163
5	5.7771
5	7.603
5	4.3873
5	4.0484
5	15.163
5	5.7771
5	7.603
5	4.3873
5	4.0484
5	15.163
5	5.7771
5	7.603
5	4.3873
5	4.0484
5	15.163
5	5.7771
5	7.603
5	4.3873
5	4.0484
5	15.163
5	5.7771
5	7.603
5	4.3873
5	4.0484
5	15.163
5	5.7771
5	7.603
5	4.3873
5	4.0484
5	15.163
5	5.7771
5	7.603
5	4.3873
5	4.0484
5	15.163
5	5.7771
5	7.603
5	4.3873
5	4.0484
5	15.163
5	5.7771
5	7.603
5	4.3873
5	4.0484
5	15.163
5	5.7771
5	7.603
5	4.3873
5	4.0484
5	15.163
5	5.7771
5	7.603
5	4.3873
5	4.0484
5	14.031
5	8.477
5	9.1385
5	4.5107
5	4.8049
5	14.031
5	8.477
5	9.1385
5	4.5107
5	4.8049
5	14.031
5	8.477
5	9.1385
5	4.5107
5	4.8049
5	14.031
5	8.477
5	9.1385
5	4.5107
5	4.8049
5	14.031
5	8.477
5	9.1385
5	4.5107
5	4.8049
5	14.031
5	8.477
5	9.1385
5	4.5107
5	4.8049
5	14.031
5	8.477
5	9.1385
5	4.5107
5	4.8049
5	14.031
5	8.477
5	9.1385
5	4.5107
5	4.8049
5	14.031
5	8.477
5	9.1385
5	4.5107
5	4.8049
5	14.031
5	8.477
5	9.1385
5	4.5107
5	4.8049
5	14.031
5	8.477
5	9.1385
5	4.5107
5	4.8049
5	14.031
5	8.477
5	9.1385
5	4.5107
5	4.8049
5	14.031
5	8.477
5	9.1385
5	4.5107
5	4.8049
5	14.031
5	8.477
5	9.1385
5	4.5107
5	4.8049
5	14.031
5	8.477
5	9.1385
5	4.5107
5	4.8049
5	6.2905
5	9.5991
5	7.99
5	8.9018
5	7.6713
5	6.2905
5	9.5991
5	7.99
5	8.9018
5	7.6713
5	6.2905
5	9.5991
5	7.99
5	8.9018
5	7.6713
5	6.2905
5	9.5991
5	7.99
5	8.9018
5	7.6713
5	6.2905
5	9.5991
5	7.99
5	8.9018
5	7.6713
5	9.0613
5	12.683
5	14.849
5	8.4717
5	7.8554
5	7.9362
5	6.9376
5	6.9154
5	11.497
5	8.5427
5	7.9362
5	6.9376
5	6.9154
5	11.497
5	8.5427
5	4.1687
5	9.5303
5	6.1261
5	6.5229
5	5.2935
5	4.1687
5	9.5303
5	6.1261
5	6.5229
5	5.2935
5	4.1687
5	9.5303
5	6.1261
5	6.5229
5	5.2935
5	4.1687
5	9.5303
5	6.1261
5	6.5229
5	5.2935
5	4.1687
5	9.5303
5	6.1261
5	6.5229
5	5.2935
5	4.1687
5	9.5303
5	6.1261
5	6.5229
5	5.2935
5	4.1687
5	9.5303
5	6.1261
5	6.5229
5	5.2935
5	4.1687
5	9.5303
5	6.1261
5	6.5229
5	5.2935
6	5.4916
6	5.0379
6	6.3318
6	6.0536
6	3.1492
6	4.7086
6	4.5692
6	6.5732
6	10.751
6	7.1548
6	11.477
6	7.1138
6	7.0982
6	11.315
6	7.7623
6	11.125
6	8.9176
6	7.2615
6	14.856
6	4.4614
6	3.6447
6	10.633
6	10.349
6	5.0652
6	12.856
6	8.5929
6	5.0734
6	3.1783
6	3.3011
6	3.3284
6	2.1635
6	4.3782
6	4.9635
6	4.1757
6	12.08
6	8.7554
6	11.191
6	8.8512
6	6.1173
6	8.9676
6	9.9627
6	8.9517
6	12.038
6	4.2153
6	3.7654
6	10.056
6	5.4583
6	5.8325
6	5.6147
6	4.9976
6	3.7752
6	5.9135
6	7.8458
6	3.2172
6	0.87539
6	7.073
6	4.6398
6	4.3457
6	7.631
6	4.7331
6	5.3692
6	7.3341
6	6.0315
6	18.973
6	4.9961
6	5.3413
6	10.114
6	5.2531
6	10.248
6	6.4619
6	10.771
6	4.9507
6	10.832
6	4.3145
6	15.057
6	6.639
6	10.255
6	9.0869
6	4.5912
6	15.18
6	13.835
6	5.6319
6	4.0413
6	15.887
6	9.5404
6	9.8987
6	9.3056
6	3.1363
6	8.6417
6	7.0814
6	5.2582
6	4.4666
6	11.133
6	15.657
6	6.1067
6	9.7979
6	8.6795
6	5.2374
6	3.5478
6	5.7904
6	3.6464
6	2.7968
6	10.144
6	10.408
6	7.1563
6	20.912
6	7.4082
6	6.5745
6	1.8465
6	7.1649
6	10.405
6	11.498
6	5.5745
6	8.0631
6	8.1747
6	11.443
6	10.125
6	7.6781
6	10.577
6	4.1417
6	10.305
6	14.002
6	9.0487
6	11.031
6	3.7261
6	10.415
6	8.9041
6	9.6563
6	8.3347
6	8.64
6	13.144
6	4.7016
6	3.2641
6	9.3393
6	7.1581
6	22.437
6	5.9016
6	5.1199
6	14.695
6	5.7578
6	7.635
6	10.66
6	6.1634
6	5.5052
6	10.747
6	6.7346
6	16.761
6	2.4737
6	5.1922
6	4.7549
6	5.7355
6	2.4267
6	6.9472
6	18.111
6	7.0863
6	1.6016
6	2.4665
6	5.1642
6	5.6159
6	6.3677
6	10.265
6	10.426
6	4.6366
6	4.3701
6	11.65
6	8.9572
6	8.8087
6	10.021
6	7.2458
6	12.226
6	7.0856
6	11.257
6	13.197
6	8.0116
6	8.1602
6	2.9582
6	12.685
6	5.6985
6	5.9331
6	5.2194
6	3.7339
6	21.391
6	7.6896
6	3.5187
6	6.8356
6	8.2249
6	9.2555
6	7.1573
6	13.438
6	4.843
6	4.4624
6	15.352
6	5.5198
6	11.362
6	3.9192
6	9.8574
6	1.7326
6	9.6602
6	4.4229
6	10.139
6	25.1
6	6.0861
6	6.9206
6	5.0765
6	6.557
6	3.553
6	11.822
6	7.623
6	8.1914
6	5.599
6	13.288
6	8.0006
6	9.3153
6	9.2998
6	8.6965
6	7.8516
6	10.523
6	8.6381
6	11.916
6	6.5353
6	7.4813
6	17.95
7	4.0344
7	7.9708
7	12.418
7	3.8766
7	10.692
7	4.6029
7	10.449
7	11.309
7	4.508
7	6.4895
7	9.8138
7	4.0258
7	8.9923
7	5.717
7	9.9827
7	5.7619
7	6.6324
7	6.6298
7	11.585
7	4.3737
7	6.5064
7	8.8875
7	8.9125
7	10.346
7	2.2645
7	4.0896
7	9.2458
7	10.079
7	9.639
7	11.743
7	4.8368
7	11.778
7	7.7006
7	6.0547
7	9.7637
7	4.6438
7	2.9676
7	12.191
7	6.5103
7	10.859
7	6.468
7	8.1313
7	14.905
7	4.2634
7	11.61
7	2.2896
7	3.8928
7	4.4386
7	14.197
7	12.648
7	14.71
7	5.815
7	5.129
7	10.136
7	5.9989
7	6.3914
7	8.8262
7	11.362
7	4.2305
7	10.625
7	4.025
7	10.391
7	11.702
7	5.6042
7	4.8962
7	4.3468
7	10.678
7	2.8171
7	12.022
7	6.41
7	12.684
7	5.5557
7	6.7929
7	3.8195
7	6.9619
7	13.152
7	11.854
7	1.8704
7	5.4929
7	5.4787
7	8.6083
7	5.5421
7	10.185
7	6.4898
7	12.142
7	5.9361
7	6.1171
7	17.372
7	7.101
7	6.4082
7	6.5966
7	5.8476
7	9.3454
7	4.0795
7	6.7222
7	9.9815
7	14.184
7	6.0203
7	8.9684
7	4.2577
7	7.6698
7	7.0594
7	7.7666
7	1.8605
7	7.1955
7	4.2337
7	4.5384
7	6.8947
7	16.745
7	4.8202
7	11.107
7	3.1346
7	8.7091
7	2.213
7	6.5334
7	8.6555
7	10.453
7	10.528
7	5.6896
7	11.857
7	9.1845
7	8.2813
7	4.3671
7	10.041
7	3.2394
7	20.636
7	6.5817
7	5.22
7	6.7041
7	7.492
7	4.6684
7	11.223
7	12.989
7	6.3988
7	5.4086
7	13.553
7	9.1082
7	9.1999
7	10.666
7	6.2634
7	2.9821
7	2.9542
7	12.958
7	9.9225
7	11.912
[truncated: 738 more rows]
