# Supplementary material for: How human runners regulate footsteps on uneven terrain
Source: eLife journal article supplement (doi:10.7554/elife.67177), 2023-02-22
Supplement: supp [file elife-67177-supp-v1.zip › elife_poa_e67177_Figure_6_source_data_1.csv]

subject	terrain_type	forward_foot_speed_touchdown	forward_foot_speed_normalized_by_forward_CoM_speed	touchdown_leg_angle	fore_aft_impulse
1	1	1.0579	0.83393	0.26707	0.87124
1	1	0.49984	0.43714	0.22153	0.925
1	1	0.65608	0.62472	0.20614	0.91736
1	1	0.45766	0.43473	0.18985	0.92503
1	1	0.76912	0.6777	0.22533	0.94343
1	1	0.55557	0.52299	0.19778	0.93286
1	1	0.67966	0.61831	0.20596	0.92907
1	1	0.70483	0.61178	0.21737	0.95401
1	1	0.72781	0.66105	0.18999	0.93672
1	1	0.56873	0.52314	0.21661	0.92522
1	1	0.44968	0.41071	0.20209	0.94777
1	1	0.48828	0.46266	0.20657	0.93898
1	1	0.5979	0.55827	0.21179	0.9348
1	1	0.66011	0.60495	0.22311	0.93863
1	1	0.46083	0.43748	0.19115	0.93963
1	1	0.77296	0.74156	0.20948	0.92539
1	1	0.60212	0.53355	0.21797	0.94967
1	1	0.79124	0.7448	0.2038	0.94521
1	1	0.77908	0.67403	0.22199	0.8846
1	1	0.3655	0.34223	0.19646	0.9367
1	1	0.54888	0.53809	0.18318	0.93314
1	1	0.61058	0.5354	0.21511	0.951
1	1	0.55775	0.51816	0.17946	0.94267
1	1	0.71797	0.69226	0.19013	0.93592
1	1	0.6216	0.60213	0.1858	0.93879
1	1	0.63276	0.59305	0.18806	0.93946
1	1	0.82981	0.73113	0.19839	0.94087
1	2	0.50628	0.44376	0.22962	0.92962
1	2	0.74285	0.68685	0.19794	0.93108
1	2	0.58862	0.53824	0.19233	0.9482
1	2	0.45763	0.39739	0.21939	0.92096
1	2	0.40531	0.39081	0.16997	0.93562
1	2	0.42793	0.40298	0.2311	0.93119
1	2	0.28284	0.32656	0.17839	0.94351
1	2	0.41584	0.36516	0.20616	0.91925
1	2	0.32935	0.3195	0.16439	0.93552
1	2	0.40132	0.38021	0.2173	0.92621
1	2	0.51298	0.47012	0.23459	0.92408
1	2	0.36096	0.32613	0.21238	0.94235
1	2	0.3504	0.34282	0.17854	0.92719
1	2	0.42845	0.42084	0.17481	0.94277
1	2	0.4618	0.46059	0.18798	0.93157
1	2	0.51302	0.50166	0.24522	0.92969
1	2	0.39968	0.38509	0.21145	0.93049
1	2	0.43953	0.41087	0.23568	0.92279
1	2	0.49257	0.45594	0.19023	0.93639
1	2	0.62355	0.56906	0.21723	0.94145
1	2	0.42715	0.3894	0.19987	0.94014
1	2	0.4452	0.41787	0.20408	0.946
1	2	0.48482	0.48716	0.18694	0.92861
1	2	0.27227	0.28206	0.17554	0.93892
1	2	0.43467	0.40402	0.21003	0.94193
1	2	0.55091	0.46817	0.24925	0.92433
1	2	0.42303	0.39857	0.21333	0.94613
1	2	0.23483	0.22115	0.16349	0.94438
1	2	0.48118	0.45533	0.20424	0.94966
1	2	0.46978	0.46242	0.20976	0.93435
1	2	0.38778	0.36637	0.18966	0.93718
1	2	0.55317	0.52202	0.20293	0.94286
1	2	0.50623	0.48499	0.19284	0.93067
1	2	0.63261	0.61984	0.2004	0.93606
1	2	0.56724	0.53343	0.2179	0.93063
1	2	0.74349	0.70965	0.19935	0.93942
1	2	0.41905	0.4038	0.21657	0.9436
1	2	0.63126	0.60692	0.19838	0.95024
1	2	0.32812	0.31785	0.19955	0.93439
1	2	0.52436	0.51035	0.20647	0.93548
1	2	0.64884	0.60132	0.20104	0.93751
1	2	0.36153	0.3445	0.20345	0.95061
1	2	0.29928	0.29744	0.20291	0.94962
1	2	0.45624	0.43481	0.19776	0.92914
1	2	0.57119	0.54484	0.22161	0.94465
1	3	0.5246	0.47647	0.21438	0.94987
1	3	0.39357	0.38091	0.16637	0.95
1	3	0.40102	0.36508	0.21824	0.94002
1	3	0.36259	0.33965	0.19815	0.94127
1	3	0.59208	0.58306	0.2089	0.94699
1	3	0.48723	0.43461	0.21967	0.95586
1	3	0.35853	0.32841	0.19713	0.94939
1	3	0.52951	0.49136	0.2372	0.94243
1	3	0.47397	0.43466	0.21261	0.93831
1	3	0.54806	0.52389	0.19083	0.93751
1	3	0.57735	0.53333	0.21823	0.95317
1	3	0.52735	0.48797	0.19146	0.92691
1	3	0.65304	0.60567	0.19894	0.94918
1	3	0.51772	0.4557	0.19966	0.9265
1	3	0.392	0.36028	0.17715	0.95441
1	3	0.41394	0.38588	0.18379	0.9395
1	3	0.46867	0.39993	0.19223	0.93532
1	3	0.34084	0.3355	0.1782	0.93043
1	3	0.72473	0.6427	0.20412	0.93425
1	3	0.3354	0.29993	0.1492	0.9441
1	3	0.70835	0.6589	0.20137	0.94126
1	3	0.37794	0.34021	0.18274	0.93374
2	1	0.29994	0.25519	0.26474	0.93341
2	1	0.22495	0.21347	0.22987	0.94812
2	1	0.11583	0.11423	0.21283	0.93965
2	1	0.19652	0.1945	0.22445	0.93797
2	1	0.26231	0.24735	0.24303	0.92438
2	1	0.34745	0.29445	0.25289	0.93323
2	1	0.27563	0.25652	0.24673	0.93916
2	1	0.29608	0.2543	0.24004	0.93312
2	1	0.2979	0.29462	0.21651	0.92961
2	1	0.31091	0.31606	0.2404	0.92341
2	1	0.26646	0.26766	0.24778	0.92702
2	1	0.22837	0.23065	0.21711	0.94257
2	1	0.27837	0.27414	0.23064	0.92225
2	1	0.33547	0.32869	0.23045	0.94217
2	1	0.41019	0.41433	0.25871	0.9363
2	1	0.22672	0.22199	0.21317	0.95667
2	1	0.29874	0.28785	0.23093	0.94199
2	1	0.58675	0.532	0.27893	0.94285
2	1	0.085076	0.083377	0.22835	0.91665
2	1	0.17007	0.14483	0.26588	0.9496
2	1	0.3545	0.33683	0.27359	0.9181
2	1	0.041307	0.040643	0.20606	0.93307
2	1	0.24184	0.23263	0.22329	0.93611
2	1	0.3751	0.32342	0.25912	0.93933
2	1	0.35069	0.32882	0.26179	0.94354
2	1	0.56363	0.53589	0.28248	0.94212
2	1	0.51919	0.47497	0.22601	0.93377
2	1	0.44227	0.43292	0.25814	0.94086
2	1	0.18022	0.17316	0.22925	0.92969
2	1	0.14169	0.13809	0.24241	0.94924
2	1	0.29409	0.29207	0.37603	0.93711
2	1	0.69385	0.66087	0.23591	0.92925
2	1	0.078214	0.072482	0.22262	0.93737
2	1	0.16006	0.16043	0.21722	0.93763
2	1	0.47484	0.43957	0.23473	0.92711
2	1	0.32742	0.30921	0.25477	0.93244
2	2	0.22094	0.21766	0.23304	0.93705
2	2	0.38343	0.35715	0.2563	0.9203
2	2	0.18881	0.17963	0.22328	0.92609
2	2	0.4118	0.36458	0.26016	0.93726
2	3	0.52554	0.47233	0.30393	0.90644
2	3	0.46012	0.44273	0.25985	0.94329
2	3	0.37612	0.36835	0.26389	0.93929
2	3	0.513	0.48669	0.27074	0.93182
2	3	0.55376	0.53064	0.26167	0.93596
2	3	0.70349	0.71005	0.26278	0.93325
2	3	0.30052	0.30537	0.25227	0.94771
2	3	0.23753	0.22935	0.22235	0.94336
2	3	0.33841	0.31928	0.26307	0.94611
2	3	0.64329	0.63907	0.27761	0.93189
2	3	0.28809	0.28142	0.24866	0.95028
2	3	0.42596	0.40634	0.2631	0.93945
2	3	0.32294	0.30471	0.25683	0.92794
2	3	0.40496	0.38799	0.25267	0.92981
2	3	0.24651	0.23867	0.25425	0.93881
2	3	0.26127	0.24825	0.2462	0.93001
2	3	0.36684	0.36219	0.25627	0.92436
2	3	0.3918	0.37754	0.25632	0.93963
2	3	0.36231	0.33775	0.26619	0.92783
2	3	0.31887	0.29485	0.26583	0.93343
2	3	0.54467	0.50907	0.26351	0.944
2	3	0.25639	0.25379	0.23849	0.9338
2	3	0.42042	0.4181	0.26556	0.93453
2	3	0.35359	0.34557	0.24576	0.94466
2	3	0.45336	0.43816	0.27278	0.93288
2	3	0.56452	0.55111	0.29028	0.93526
2	3	0.50703	0.48665	0.27568	0.93861
2	3	0.61193	0.57246	0.3046	0.93387
2	3	0.3179	0.29554	0.27318	0.93902
2	3	0.54619	0.51884	0.27526	0.9494
2	3	0.33186	0.31355	0.26392	0.93743
2	3	1.0729	0.95641	0.29892	0.92363
2	3	0.38607	0.36669	0.25339	0.94423
2	3	0.42368	0.3774	0.27224	0.94
2	3	0.29202	0.2374	0.28389	0.90038
2	3	0.22475	0.21086	0.21113	0.93908
2	3	0.24816	0.2298	0.24656	0.94094
2	3	0.22289	0.2203	0.22049	0.92503
2	3	0.09896	0.098149	0.2261	0.91837
2	3	0.19853	0.19521	0.21625	0.94051
2	3	0.081193	0.079048	0.24224	0.91996
2	3	0.27001	0.25767	0.22931	0.92971
2	3	0.1956	0.1896	0.21802	0.93503
2	3	0.46568	0.45615	0.25172	0.90994
2	3	0.26831	0.23893	0.3555	0.9401
2	3	0.26374	0.2561	0.23073	0.91065
2	3	0.22724	0.22361	0.18266	0.94141
2	3	0.30818	0.30177	0.23768	0.92894
2	3	0.35911	0.33511	0.23325	0.92965
2	3	0.26221	0.25131	0.2665	0.92221
2	3	0.2483	0.23649	0.23384	0.93532
2	3	0.40945	0.39879	0.24584	0.93754
2	3	0.2081	0.1946	0.20014	0.9536
2	3	0.20417	0.19227	0.24768	0.94215
2	3	0.15946	0.1502	0.22389	0.94871
2	3	0.23742	0.22078	0.23796	0.95375
2	3	0.60037	0.5579	0.25994	0.92148
2	3	0.22393	0.21688	0.21559	0.94825
2	3	0.21764	0.20797	0.1949	0.94154
2	3	0.14228	0.13557	0.19475	0.95608
2	3	0.11821	0.11112	0.19767	0.942
2	3	0.17642	0.16598	0.22776	0.92772
2	3	0.18948	0.1876	0.22264	0.94335
2	3	0.37831	0.37483	0.2393	0.95517
2	3	0.67783	0.6223	0.28053	0.93722
2	3	0.30823	0.28602	0.24134	0.92544
2	3	0.19764	0.18431	0.23764	0.9321
2	3	0.17664	0.17636	0.2093	0.93388
2	3	0.10166	0.097686	0.21862	0.93327
2	3	0.34849	0.31758	0.25923	0.93589
2	3	0.15016	0.13952	0.25945	0.9242
2	3	0.3364	0.31421	0.23361	0.93837
2	3	0.20194	0.18536	0.24182	0.94829
3	1	0.45933	0.42849	0.1994	0.95677
3	1	0.48906	0.42571	0.21733	0.93612
3	1	0.49851	0.46277	0.20318	0.95839
3	1	0.49088	0.41792	0.22209	0.96501
3	1	0.75357	0.64837	0.21789	0.94555
3	1	0.41579	0.36555	0.20866	0.94687
3	1	0.46868	0.40403	0.19322	0.93673
3	1	0.48533	0.41157	0.22057	0.92651
3	1	0.49056	0.423	0.20158	0.93671
3	1	0.55046	0.49901	0.20297	0.9612
3	1	0.52185	0.4248	0.21325	0.95968
3	1	0.44445	0.40749	0.18705	0.93572
3	1	0.45859	0.40005	0.21139	0.93224
3	1	0.53848	0.46564	0.19393	0.96017
3	1	0.48523	0.41322	0.20366	0.93202
3	1	0.56416	0.50487	0.18335	0.95428
3	1	0.50389	0.45207	0.18963	0.95503
3	1	0.56282	0.56462	0.18022	0.9547
3	1	0.58211	0.58136	0.18641	0.9473
3	1	0.46304	0.41217	0.18669	0.93509
3	1	0.53453	0.52445	0.18712	0.95103
3	1	0.22419	0.21971	0.12547	0.95591
3	1	0.19591	0.1857	0.13385	0.9636
3	1	0.62214	0.59995	0.18767	0.96216
3	1	0.16432	0.15821	0.1125	0.96061
3	1	0.44596	0.38544	0.19279	0.9628
3	1	0.61569	0.58173	0.22105	0.93268
3	1	0.47115	0.43518	0.20982	0.94531
3	1	0.61834	0.53949	0.20775	0.95448
3	1	0.39924	0.36794	0.19707	0.94592
3	1	0.75508	0.6504	0.21684	0.95276
3	1	0.43278	0.36857	0.22445	0.94274
3	1	0.58478	0.48426	0.21102	0.9526
3	1	0.54016	0.46739	0.23383	0.93064
3	1	0.62141	0.52374	0.20703	0.95584
3	1	0.58951	0.48619	0.2137	0.95121
3	1	0.51387	0.46832	0.20128	0.93958
3	1	0.53094	0.44637	0.20406	0.95561
3	1	0.5276	0.4658	0.20128	0.95406
3	1	0.4896	0.43903	0.21298	0.93215
3	1	0.48812	0.44166	0.18652	0.95845
3	1	0.681	0.66029	0.21453	0.92565
3	1	0.47079	0.39686	0.17938	0.96177
3	1	0.55948	0.48256	0.19518	0.96173
3	1	0.39905	0.3721	0.20348	0.92702
3	1	0.32852	0.28687	0.19846	0.95351
3	1	0.60253	0.59659	0.18807	0.93886
3	1	0.54471	0.54861	0.18599	0.95099
3	1	0.7812	0.67803	0.2276	0.94556
3	1	0.42795	0.40362	0.18041	0.95219
3	1	0.51986	0.48117	0.1665	0.96446
3	2	0.33443	0.29698	0.18645	0.92648
3	2	0.53145	0.4786	0.2099	0.92722
3	2	0.26791	0.26395	0.15679	0.94818
3	2	0.22858	0.21213	0.1562	0.95916
3	2	0.28232	0.27444	0.18078	0.93952
3	2	0.29891	0.28747	0.16672	0.95261
3	2	0.40069	0.36622	0.19155	0.93062
3	2	0.33658	0.29519	0.17576	0.94434
3	2	0.35232	0.32311	0.18579	0.93298
3	2	0.33714	0.27766	0.21187	0.92911
3	2	0.4894	0.4495	0.29948	0.92655
3	2	0.46598	0.40656	0.20805	0.9337
3	2	0.21391	0.19349	0.17104	0.94273
3	2	0.30308	0.27429	0.1927	0.93389
3	2	-0.0090984	-0.0083134	0.17464	0.93753
3	2	0.71686	0.67035	0.20983	0.94193
3	2	0.3689	0.33891	0.2031	0.92753
3	2	0.30408	0.27298	0.19717	0.93178
3	2	0.55866	0.50074	0.18712	0.92205
3	2	0.083514	0.082878	0.19187	0.92179
3	3	0.49878	0.3496	0.25265	0.95231
3	3	0.72652	0.64095	0.24289	0.93917
3	3	0.44009	0.40188	0.24157	0.94081
3	3	0.66088	0.5764	0.2756	0.92733
3	3	0.50094	0.43975	0.25248	0.93691
3	3	0.47773	0.41694	0.24749	0.92473
3	3	0.47551	0.43534	0.24442	0.91188
3	3	0.46193	0.43395	0.21291	0.94512
3	3	0.48278	0.45083	0.22652	0.93092
3	3	0.46548	0.41856	0.20033	0.95767
3	3	0.61955	0.52527	0.23845	0.94523
3	3	0.43781	0.39522	0.20383	0.96059
3	3	0.46226	0.41499	0.19767	0.95342
3	3	0.40058	0.34199	0.22016	0.95507
3	3	0.40335	0.35881	0.22169	0.91244
3	3	0.27761	0.25275	0.23122	0.92918
3	3	0.71014	0.59615	0.27455	0.93235
3	3	0.43434	0.37897	0.21862	0.93997
3	3	0.3713	0.32507	0.22889	0.94401
3	3	0.33729	0.32354	0.17964	0.95753
3	3	0.33602	0.31802	0.18951	0.94305
3	3	0.38277	0.32983	0.18757	0.95468
3	3	0.40503	0.36929	0.18966	0.94532
3	3	0.69771	0.61408	0.20625	0.95002
4	1	0.687	0.59299	0.21962	0.92164
4	1	0.42465	0.40483	0.16804	0.91956
4	1	0.58619	0.52714	0.20054	0.94206
4	1	0.37618	0.34844	0.19227	0.93665
4	1	0.38531	0.35807	0.16662	0.92971
4	1	0.46202	0.43042	0.20633	0.93774
4	1	0.42202	0.37779	0.1952	0.92793
4	1	0.57375	0.521	0.19909	0.927
4	1	0.56455	0.56499	0.16782	0.95381
4	1	0.42623	0.39957	0.18092	0.93613
4	1	0.39806	0.37282	0.18106	0.92559
4	1	0.47018	0.45023	0.17868	0.95418
4	1	0.36838	0.34688	0.17485	0.91717
4	1	0.4514	0.44773	0.20322	0.93017
4	1	0.79114	0.74818	0.18644	0.94479
4	1	0.58789	0.56762	0.19623	0.95346
4	1	0.5415	0.53626	0.18042	0.94919
4	1	0.38848	0.36397	0.17427	0.92891
4	1	0.29892	0.30259	0.17495	0.93785
4	1	0.44504	0.41022	0.18609	0.93417
4	1	0.4664	0.44338	0.18045	0.95417
4	1	0.43927	0.43392	0.16703	0.95238
4	1	0.43022	0.39972	0.19333	0.949
4	1	0.50491	0.47411	0.19668	0.92042
4	1	0.39294	0.36041	0.17391	0.94637
4	1	0.40014	0.3715	0.18819	0.92506
4	1	0.5152	0.4952	0.18686	0.95367
4	1	0.42094	0.38923	0.19906	0.91234
4	1	0.59261	0.57451	0.15992	0.94471
4	1	0.66212	0.60823	0.19251	0.93323
4	1	0.54691	0.49986	0.17246	0.9477
4	1	0.46445	0.43142	0.19687	0.94541
4	1	0.43505	0.41509	0.20185	0.94706
4	1	0.55005	0.53719	0.17507	0.94897
4	1	0.71592	0.64997	0.20509	0.94792
4	1	1.0197	1.0123	0.20306	0.93866
4	1	0.58911	0.5789	0.18571	0.94521
4	1	0.48895	0.48136	0.20471	0.94113
4	1	0.43808	0.41922	0.1849	0.95387
4	1	0.44852	0.4205	0.19699	0.91813
4	1	0.70732	0.68912	0.19967	0.93386
4	1	0.44494	0.43635	0.19315	0.93268
4	1	0.66566	0.64071	0.19767	0.94985
4	1	0.71619	0.68895	0.22347	0.9459
4	1	0.6626	0.64945	0.17787	0.95275
4	1	0.3678	0.35922	0.16858	0.95292
4	1	0.8256	0.8093	0.20447	0.93834
4	1	0.56941	0.54388	0.18159	0.95293
4	1	0.54662	0.5194	0.18096	0.95419
4	1	0.4042	0.37653	0.20247	0.9334
4	1	0.57299	0.54889	0.18426	0.95382
4	1	0.27616	0.27544	0.19166	0.92813
4	1	0.70032	0.65008	0.19243	0.95525
4	1	0.48351	0.47119	0.17862	0.94847
4	1	0.58263	0.55277	0.17906	0.95427
4	2	0.20531	0.19126	0.19135	0.92962
4	2	0.27783	0.25106	0.19427	0.91962
4	2	0.3939	0.3768	0.18686	0.93068
4	2	0.4211	0.38433	0.23618	0.92828
4	2	0.48622	0.46967	0.19722	0.93387
4	2	0.31314	0.2975	0.19225	0.92202
4	2	0.32592	0.31323	0.19238	0.92706
4	2	0.37277	0.33385	0.19636	0.92624
4	2	0.41805	0.36855	0.19976	0.91949
4	2	0.33434	0.29381	0.18816	0.9487
4	2	0.30128	0.31751	0.16607	0.94853
4	2	0.32879	0.32024	0.18636	0.93508
4	2	0.44655	0.42074	0.20929	0.92718
4	2	0.29764	0.2828	0.17828	0.92592
4	2	0.35079	0.32612	0.1863	0.9379
4	2	0.35386	0.32577	0.1905	0.94022
4	2	0.32896	0.30974	0.18964	0.92694
4	2	0.41956	0.39711	0.19364	0.92579
4	2	0.35164	0.3164	0.1968	0.93253
4	2	0.26769	0.25153	0.17018	0.93799
4	2	0.31475	0.304	0.18125	0.94549
4	2	0.29659	0.28827	0.17836	0.94574
4	2	0.36448	0.34279	0.17872	0.93236
4	2	0.56077	0.50572	0.21373	0.92624
4	2	0.38317	0.36423	0.19255	0.9348
4	2	0.28629	0.30517	0.16375	0.93223
4	2	0.36506	0.36823	0.15712	0.93158
4	2	0.2749	0.26946	0.17593	0.94388
4	2	0.37104	0.34894	0.16613	0.94585
4	2	0.58868	0.46331	0.24668	0.92731
4	2	0.31233	0.30116	0.18455	0.93242
4	2	0.35338	0.3201	0.20183	0.93085
4	2	0.32628	0.30462	0.17632	0.94229
4	2	0.35413	0.3348	0.22355	0.88967
4	2	0.37675	0.34602	0.19483	0.93188
4	2	0.3345	0.2994	0.18616	0.94256
4	2	0.53077	0.48576	0.20611	0.94043
4	2	0.40972	0.35892	0.19152	0.92991
4	2	0.41646	0.34238	0.17705	0.94519
4	2	0.11747	0.14334	0.10612	0.93311
4	2	0.30983	0.3159	0.1773	0.91949
4	2	0.28392	0.27473	0.15978	0.94696
4	2	0.41326	0.39293	0.17308	0.932
4	2	0.28482	0.27407	0.18237	0.93676
4	2	0.48632	0.46364	0.19915	0.93949
4	2	0.284	0.27661	0.19054	0.92701
4	2	0.56409	0.52042	0.23214	0.91913
4	2	0.47292	0.45586	0.18704	0.93936
4	2	0.52323	0.48354	0.20357	0.9368
4	2	0.60623	0.60091	0.20951	0.93237
4	2	0.35208	0.33869	0.20801	0.93539
4	2	0.34055	0.30832	0.17366	0.93833
4	2	0.16208	0.15806	0.18936	0.93108
4	2	0.19823	0.21152	0.17624	0.93157
4	2	0.58138	0.59027	0.19801	0.93295
4	2	0.26674	0.25874	0.20792	0.93187
4	2	0.51628	0.49353	0.2023	0.92832
4	2	0.34065	0.31395	0.21584	0.92039
4	3	0.38697	0.315	0.20713	0.92112
4	3	0.62933	0.56959	0.21098	0.92695
4	3	0.48289	0.44252	0.19423	0.93211
4	3	0.6546	0.60201	0.21475	0.92556
4	3	0.61225	0.59674	0.20882	0.94657
4	3	0.76634	0.72394	0.21862	0.92589
4	3	0.20381	0.20789	0.15183	0.93274
4	3	0.57821	0.56091	0.20629	0.93552
4	3	0.52986	0.53618	0.22681	0.92591
4	3	0.3519	0.34184	0.17769	0.93368
4	3	0.50542	0.44006	0.203	0.93837
4	3	0.28759	0.28021	0.159	0.95785
4	3	0.41882	0.37193	0.19982	0.94026
4	3	0.51726	0.49036	0.19354	0.9434
4	3	0.41465	0.39319	0.20357	0.91988
4	3	0.32024	0.30643	0.20612	0.93559
4	3	0.5504	0.52205	0.20893	0.92531
4	3	0.26266	0.25308	0.1934	0.94324
4	3	0.4533	0.41537	0.22034	0.91123
4	3	0.392	0.34677	0.21261	0.92787
4	3	0.41209	0.37281	0.20087	0.92151
4	3	0.42571	0.37611	0.21471	0.95487
4	3	0.35741	0.35576	0.17704	0.92973
4	3	0.22401	0.21753	0.16931	0.93065
4	3	0.30452	0.30538	0.17624	0.94731
4	3	0.56016	0.49619	0.223	0.92718
4	3	0.40459	0.36323	0.20812	0.91711
4	3	0.39893	0.37612	0.18175	0.93047
4	3	0.88964	0.83836	0.21521	0.94004
4	3	0.45701	0.41532	0.20236	0.94208
4	3	0.54854	0.51781	0.20773	0.9303
4	3	0.47008	0.44934	0.18649	0.94607
4	3	0.44973	0.41797	0.19077	0.94387
4	3	0.4656	0.41058	0.18725	0.93522
4	3	0.39929	0.36064	0.17667	0.93718
4	3	0.22447	0.2239	0.13733	0.94474
4	3	0.27493	0.24518	0.1804	0.92841
4	3	0.41485	0.38627	0.18898	0.94873
4	3	0.3496	0.32186	0.17207	0.93345
4	3	0.28511	0.26029	0.17273	0.93182
4	3	0.20772	0.19707	0.16882	0.91507
4	3	0.32516	0.3216	0.19236	0.92683
4	3	0.48336	0.46436	0.1959	0.93207
4	3	0.36481	0.37145	0.1957	0.9382
4	3	0.52601	0.49285	0.18085	0.92688
4	3	0.32457	0.30355	0.18251	0.93082
4	3	0.31091	0.28854	0.14803	0.94494
4	3	0.34955	0.33621	0.19003	0.92118
4	3	0.19673	0.18196	0.16025	0.93914
4	3	0.31982	0.30218	0.16615	0.94409
4	3	0.45378	0.43479	0.17686	0.93581
4	3	0.3835	0.36453	0.18862	0.92861
4	3	0.27353	0.24326	0.1914	0.94687
4	3	0.23001	0.21118	0.14704	0.94624
4	3	0.15375	0.13976	0.13923	0.9601
4	3	0.32707	0.28321	0.19483	0.937
4	3	0.24999	0.25538	0.14855	0.95108
4	3	0.3287	0.29573	0.18649	0.94277
4	3	0.22799	0.20567	0.17971	0.93288
4	3	0.30198	0.27811	0.18544	0.9188
4	3	0.27542	0.25468	0.14119	0.95002
4	3	0.24586	0.2319	0.15474	0.94629
4	3	0.42204	0.43091	0.17161	0.95608
4	3	0.38339	0.35471	0.18203	0.93267
4	3	0.23354	0.21557	0.17106	0.93944
5	1	0.088927	0.083831	0.23443	0.95316
5	1	0.53204	0.52004	0.21706	0.94329
5	1	0.1209	0.1158	0.21189	0.94546
5	1	0.50515	0.4901	0.20164	0.94926
5	1	0.07823	0.073924	0.19124	0.95047
5	1	0.24905	0.23418	0.19355	0.94478
5	1	0.24631	0.23396	0.18608	0.93866
5	1	0.1039	0.099079	0.20331	0.94867
5	1	0.12529	0.12121	0.20024	0.95599
5	1	0.26648	0.25621	0.17567	0.94238
5	1	0.2184	0.21446	0.19833	0.92426
5	1	-0.01112	-0.010051	0.15904	0.95301
5	1	0.048407	0.046261	0.17293	0.95027
5	1	0.20894	0.20562	0.19766	0.9474
5	1	0.23598	0.21652	0.18968	0.93841
5	1	0.18512	0.17496	0.20266	0.93928
5	1	0.032385	0.030464	0.18786	0.95108
5	1	0.1364	0.13357	0.18714	0.94432
5	1	0.0967	0.090333	0.18541	0.94266
5	1	0.18941	0.18157	0.17106	0.93976
5	1	0.50005	0.48258	0.2181	0.95258
5	1	0.23095	0.24129	0.16536	0.94342
5	1	0.31697	0.30511	0.21141	0.94863
5	1	0.16027	0.15418	0.19028	0.94067
5	1	0.018233	0.017436	0.21019	0.93183
5	1	0.066764	0.061841	0.18849	0.943
5	1	0.18512	0.18385	0.1726	0.94629
5	1	0.23175	0.20362	0.2292	0.94564
5	1	0.22114	0.21854	0.18612	0.95202
5	1	0.58262	0.55997	0.23834	0.93416
5	1	-0.22653	-0.22154	0.21646	0.94401
5	1	0.35502	0.33724	0.23192	0.94571
5	1	0.12215	0.11949	0.20935	0.95103
5	1	0.12976	0.12128	0.19502	0.95477
5	1	0.22834	0.212	0.18655	0.94921
5	1	0.5441	0.51158	0.2316	0.93717
5	1	0.32509	0.30536	0.23169	0.93784
5	1	0.10431	0.097248	0.16334	0.96096
5	1	0.1634	0.16132	0.18567	0.95596
5	1	0.38273	0.35866	0.17786	0.94545
5	1	0.29532	0.28129	0.17521	0.94398
5	1	0.37762	0.36098	0.21073	0.94279
5	1	0.28821	0.2711	0.21462	0.93785
5	1	0.26165	0.25418	0.19569	0.94089
5	1	0.21925	0.20281	0.21553	0.94224
5	1	0.21462	0.20013	0.21486	0.9474
5	1	0.14161	0.13607	0.17583	0.96129
5	1	0.25235	0.25147	0.16783	0.93305
5	1	0.42906	0.39822	0.21465	0.92883
5	1	0.16873	0.15943	0.20106	0.93288
5	1	0.31675	0.30527	0.22367	0.93873
5	1	0.21505	0.19344	0.31199	0.95114
5	1	0.21454	0.19508	0.20962	0.94113
5	1	0.34239	0.3189	0.21501	0.95215
5	1	0.4263	0.436	0.23775	0.95183
5	1	0.3062	0.27117	0.22636	0.94512
5	1	0.11016	0.10653	0.18658	0.95291
5	2	0.1909	0.15967	0.16019	0.95405
5	2	0.2888	0.27732	0.1752	0.95115
5	2	-0.14095	-0.13535	0.22491	0.93468
5	2	0.21003	0.20167	0.23047	0.93377
5	2	0.082045	0.074031	0.20077	0.94718
5	2	0.056049	0.054149	0.2018	0.94535
5	2	0.43521	0.40864	0.18536	0.94952
5	2	0.070202	0.064174	0.21009	0.95117
5	2	0.32764	0.31285	0.18899	0.94902
5	2	0.26544	0.26256	0.22395	0.95217
5	2	-0.24491	-0.23559	0.17999	0.96066
5	2	0.6052	0.585	0.23216	0.92053
5	2	-0.020268	-0.017841	0.1966	0.94629
5	2	0.6091	0.58131	0.21624	0.94352
5	2	0.043337	0.034815	0.17645	0.95051
5	2	0.0063817	0.0059005	0.19155	0.93835
5	2	-0.041259	-0.040738	0.17756	0.94744
5	2	0.2135	0.20228	0.20406	0.94098
5	2	0.21892	0.19741	0.21989	0.91559
5	2	0.23069	0.19354	0.22451	0.93015
5	2	0.48174	0.47174	0.20314	0.9492
5	2	-0.18318	-0.18465	0.15135	0.95524
5	2	0.34664	0.32744	0.19121	0.94607
5	2	0.056816	0.059149	0.18952	0.9491
5	2	0.075902	0.074435	0.20321	0.94381
5	2	0.15239	0.16167	0.17793	0.95289
5	2	-0.18862	-0.1898	0.15921	0.95531
5	2	0.083553	0.087034	0.17368	0.95374
5	2	-0.054919	-0.052526	0.20135	0.94211
5	2	0.072587	0.068997	0.18773	0.94505
5	2	0.049972	0.051849	0.16802	0.95348
5	2	0.052478	0.052592	0.17064	0.9591
5	2	0.20051	0.17401	0.22424	0.92772
5	2	0.36329	0.35433	0.20384	0.95817
5	2	0.08483	0.085914	0.17746	0.96008
5	2	0.036362	0.034456	0.20283	0.94353
5	2	-0.0068938	-0.0065194	0.19489	0.95261
5	2	0.014821	0.014081	0.18318	0.95387
5	2	0.16252	0.13511	0.19524	0.94703
5	2	0.23063	0.18955	0.22195	0.94404
5	2	0.087943	0.086351	0.19092	0.94596
5	2	0.32618	0.30832	0.19725	0.94506
5	2	0.22808	0.21595	0.19289	0.94841
5	2	0.62712	0.56563	0.21257	0.94099
5	2	0.17599	0.16748	0.19705	0.94757
5	2	0.26743	0.24597	0.21397	0.92213
5	2	0.0084389	0.0079924	0.16261	0.95653
5	2	0.22656	0.21216	0.19555	0.93522
5	2	0.095347	0.089812	0.19232	0.95031
5	2	0.23341	0.21561	0.19765	0.95266
5	2	0.097465	0.095096	0.16727	0.95743
5	2	0.33387	0.31331	0.20046	0.95204
5	2	-0.076183	-0.074044	0.18065	0.94398
5	2	0.55661	0.52198	0.22615	0.93493
5	2	-0.10252	-0.099157	0.14993	0.96217
5	2	-0.032373	-0.032055	0.18677	0.95079
5	2	0.053824	0.054146	0.18378	0.95456
5	2	0.06634	0.064868	0.20815	0.93955
5	2	0.036876	0.038872	0.18258	0.94882
5	2	0.41369	0.40783	0.21061	0.95894
5	2	0.1703	0.16976	0.19705	0.92554
5	2	0.47359	0.48054	0.21558	0.94624
5	2	0.085071	0.084094	0.18975	0.94766
5	2	0.12042	0.1151	0.17867	0.95097
5	2	0.44802	0.45428	0.22451	0.93871
5	2	0.35204	0.30371	0.23007	0.93376
5	2	0.067445	0.064554	0.19344	0.95489
5	2	0.53127	0.53158	0.22316	0.95106
5	2	0.29195	0.2737	0.19393	0.95011
5	2	0.23402	0.21974	0.19691	0.9441
5	2	0.19255	0.18412	0.20504	0.93663
5	3	0.56372	0.58649	0.19186	0.94173
5	3	0.10564	0.10202	0.16078	0.96834
5	3	0.31958	0.31009	0.25465	0.91958
5	3	0.089361	0.08492	0.21023	0.94564
5	3	0.046971	0.045831	0.20615	0.96086
5	3	0.32674	0.3081	0.2512	0.9423
5	3	0.17311	0.1712	0.21123	0.93873
5	3	-0.0041001	-0.0041526	0.14086	0.94454
5	3	-0.022912	-0.021681	0.16703	0.94819
5	3	0.056957	0.057138	0.20703	0.95133
5	3	0.058788	0.055086	0.15476	0.95437
5	3	0.17882	0.17288	0.19236	0.93381
5	3	0.18759	0.18056	0.1872	0.93785
5	3	0.043201	0.039945	0.14699	0.96114
6	1	0.30881	0.26697	0.17097	0.93372
6	1	0.28506	0.21623	0.1602	0.93738
6	1	0.31581	0.27479	0.15789	0.93454
6	1	0.28658	0.25895	0.16125	0.93716
6	1	0.70127	0.65339	0.15824	0.94324
6	1	0.25529	0.22889	0.15633	0.93787
6	1	0.12725	0.11661	0.1795	0.95618
6	1	0.52216	0.47904	0.17647	0.94475
6	1	0.5314	0.4957	0.14253	0.95532
6	1	0.68618	0.61234	0.16744	0.94464
6	1	0.15084	0.13422	0.1512	0.93868
6	1	0.42001	0.40305	0.17376	0.9423
6	1	0.32124	0.28621	0.16826	0.93702
6	1	0.60415	0.57228	0.12931	0.93979
6	1	0.20525	0.18778	0.15208	0.94523
6	1	0.5522	0.50234	0.16704	0.95128
6	1	0.1815	0.16527	0.16052	0.94476
6	1	0.83092	0.71518	0.19139	0.94303
6	1	0.57789	0.52815	0.16495	0.95212
6	1	0.29788	0.2568	0.15467	0.93864
6	1	0.58048	0.52153	0.17743	0.94526
6	1	0.24332	0.22505	0.17982	0.93194
6	1	0.47679	0.4648	0.16084	0.93864
6	1	0.00011884	0.00010536	0.17188	0.9376
6	1	0.27023	0.23799	0.15618	0.94525
6	1	0.31233	0.27333	0.17352	0.942
6	1	0.41057	0.38323	0.16224	0.95021
6	1	0.3955	0.31087	0.19775	0.94049
6	1	0.44893	0.38385	0.18245	0.94445
6	1	0.81788	0.75648	0.19424	0.93825
6	1	0.4799	0.43454	0.17751	0.94758
6	1	0.55442	0.51025	0.16052	0.94668
6	1	0.30785	0.28574	0.15669	0.94064
6	1	0.45318	0.39828	0.2169	0.9422
6	1	0.45293	0.41079	0.16644	0.94168
6	1	0.35129	0.32961	0.16233	0.93797
6	1	0.34112	0.30644	0.15349	0.94238
6	1	0.52859	0.50556	0.20175	0.93863
6	1	0.55197	0.49024	0.17116	0.93805
6	1	0.37694	0.33284	0.20814	0.94551
6	1	0.29488	0.27765	0.13985	0.94319
6	1	0.40897	0.3729	0.15709	0.94884
6	1	0.63208	0.56231	0.16915	0.94492
6	1	0.41382	0.37286	0.15749	0.95715
6	1	0.26696	0.2305	0.16621	0.95142
6	1	0.82251	0.75523	0.19885	0.9437
6	1	0.3879	0.35018	0.17406	0.9499
6	1	0.38464	0.3714	0.16115	0.93747
6	1	0.71829	0.63346	0.19998	0.92998
6	1	0.24904	0.2171	0.17105	0.95045
6	2	0.25566	0.2373	0.19662	0.94613
6	2	0.20626	0.17054	0.17677	0.94269
6	2	0.31566	0.27326	0.21376	0.94647
6	2	0.1986	0.17977	0.1836	0.95277
6	2	0.31097	0.27343	0.19401	0.94138
6	2	0.24409	0.21419	0.18963	0.94163
6	2	0.19622	0.17152	0.17326	0.94438
6	2	0.16914	0.15774	0.14146	0.94695
6	2	0.18694	0.1634	0.15611	0.94729
6	2	0.27838	0.24652	0.18245	0.95236
6	2	0.18685	0.17085	0.18111	0.94832
6	2	0.31384	0.29104	0.16684	0.95804
6	2	0.26695	0.23498	0.17825	0.9464
6	2	0.54926	0.4778	0.20223	0.94757
6	2	0.45889	0.42084	0.17341	0.95793
6	3	0.56875	0.48544	0.22623	0.94028
6	3	0.27106	0.24888	0.21458	0.93714
6	3	0.54357	0.53615	0.25338	0.93382
6	3	0.18523	0.15848	0.19126	0.9455
6	3	0.21346	0.18462	0.24149	0.94335
6	3	-0.064275	-0.056606	0.18595	0.94333
6	3	0.16712	0.15855	0.19734	0.94763
6	3	0.11776	0.11649	0.17826	0.94488
6	3	0.053552	0.046937	0.1896	0.94268
6	3	0.35137	0.35364	0.22091	0.94118
6	3	0.48067	0.44219	0.23967	0.94776
6	3	0.056422	0.051442	0.20516	0.94604
6	3	0.19859	0.19524	0.22457	0.92347
6	3	0.31415	0.27705	0.23451	0.94846
6	3	0.25675	0.23998	0.21896	0.93128
6	3	0.19842	0.16994	0.19111	0.94823
6	3	0.14928	0.14289	0.23956	0.93778
6	3	0.035713	0.03345	0.19152	0.93418
6	3	0.12403	0.11123	0.22449	0.9452
6	3	0.43641	0.41718	0.20158	0.94041
6	3	0.10803	0.093428	0.16057	0.96652
6	3	0.077183	0.070999	0.18965	0.96276
6	3	0.010537	0.0099358	0.12927	0.96557
6	3	0.36426	0.33955	0.21278	0.94192
6	3	0.25084	0.22244	0.19826	0.94491
6	3	-0.012151	-0.011509	0.16963	0.96392
6	3	0.046689	0.041056	0.12592	0.95689
6	3	0.18958	0.17563	0.20148	0.93635
6	3	0.13783	0.11379	0.14905	0.95267
6	3	0.080895	0.073755	0.16426	0.96548
6	3	0.63054	0.54905	0.22465	0.9477
6	3	0.26691	0.23463	0.2055	0.94557
6	3	0.090913	0.075922	0.17863	0.96115
6	3	0.070931	0.062182	0.16083	0.946
6	3	0.38603	0.34816	0.16276	0.95148
6	3	0.091787	0.088528	0.18552	0.96291
6	3	0.12402	0.11562	0.15183	0.95452
6	3	0.14513	0.13507	0.18483	0.94603
6	3	0.3934	0.36867	0.21988	0.9465
7	1	0.74626	0.67891	0.21433	0.94743
7	1	0.63557	0.6224	0.19239	0.94404
7	1	0.60408	0.56624	0.2148	0.94793
7	1	0.50995	0.50342	0.18401	0.95663
7	1	0.64574	0.59351	0.20843	0.94397
7	1	0.56292	0.52842	0.20202	0.9402
7	1	0.52504	0.48997	0.20856	0.94351
7	1	0.53457	0.53028	0.20772	0.94831
7	1	0.58702	0.54757	0.21519	0.94513
7	1	0.52156	0.50398	0.20595	0.9521
7	1	0.52105	0.45784	0.23379	0.9468
7	1	0.39237	0.36321	0.23257	0.92918
7	1	0.756	0.69036	0.2088	0.95179
7	1	1.1009	0.99858	0.19465	0.93893
7	1	0.64817	0.61177	0.22914	0.94541
7	1	0.48359	0.45512	0.23487	0.94873
7	1	0.74023	0.68994	0.23591	0.94393
7	1	0.75987	0.7232	0.21885	0.95216
7	1	0.79388	0.71332	0.23722	0.92672
7	1	0.75005	0.70734	0.22429	0.9389
7	1	0.71674	0.64117	0.25004	0.93407
7	1	0.64567	0.58939	0.23516	0.93526
7	1	0.56389	0.53306	0.23053	0.94109
7	1	0.70869	0.67379	0.19758	0.94545
7	1	0.70372	0.64665	0.2567	0.92532
7	1	0.71695	0.61757	0.2472	0.93922
7	1	0.63024	0.61852	0.18961	0.95087
7	1	0.81283	0.72256	0.22315	0.94221
7	1	0.7548	0.69772	0.22941	0.92599
7	1	0.75539	0.68914	0.20784	0.95392
7	1	0.56413	0.49954	0.22512	0.93772
7	2	0.35167	0.30496	0.18799	0.94393
7	2	0.35358	0.32501	0.18528	0.95209
7	2	0.40678	0.375	0.19969	0.94265
7	2	0.49393	0.43559	0.2167	0.94514
7	2	0.45066	0.4028	0.22635	0.91504
7	2	0.34591	0.29937	0.23569	0.92828
7	2	0.43957	0.39137	0.22988	0.9373
7	2	0.18494	0.17102	0.1725	0.94441
7	2	0.48008	0.41561	0.21136	0.93632
7	2	0.34001	0.30535	0.21426	0.9074
7	2	0.35469	0.30643	0.22882	0.93898
7	2	0.41214	0.36037	0.25428	0.92093
7	2	0.30048	0.27168	0.20194	0.93467
7	2	0.36192	0.33146	0.24138	0.90295
7	2	0.49351	0.44041	0.22955	0.94125
7	2	0.36027	0.3316	0.24361	0.91195
7	2	0.20792	0.18861	0.21178	0.93798
7	2	0.41697	0.37561	0.25082	0.93584
7	2	0.39578	0.34659	0.23176	0.90688
7	2	0.49215	0.44869	0.21897	0.93726
7	2	0.40765	0.37397	0.22005	0.94321
7	2	0.41384	0.37189	0.21244	0.94687
7	2	0.45487	0.44917	0.22729	0.93608
7	2	0.55826	0.51783	0.21463	0.94462
7	2	0.46776	0.39645	0.25712	0.92956
7	2	0.56009	0.50362	0.22574	0.9303
7	2	0.38709	0.37332	0.20058	0.93222
7	2	0.43599	0.41911	0.20723	0.9337
7	2	0.35334	0.32664	0.19867	0.95348
7	2	0.45333	0.41079	0.24086	0.93508
7	2	0.55653	0.51215	0.21708	0.93152
7	2	0.37044	0.34776	0.23562	0.93633
7	2	0.32213	0.3028	0.1856	0.94576
7	2	0.40975	0.37333	0.25029	0.92318
7	2	0.55567	0.51232	0.2329	0.89424
7	2	0.40608	0.38932	0.21792	0.90319
7	2	0.33944	0.30365	0.24809	0.94493
7	2	0.31494	0.28953	0.2224	0.92696
7	2	0.37578	0.36807	0.17822	0.93052
7	2	0.3544	0.32161	0.2504	0.91184
7	2	0.38501	0.34662	0.20082	0.92956
7	2	0.48692	0.43504	0.23204	0.94222
7	2	0.52448	0.46669	0.23728	0.94319
7	2	0.52199	0.45035	0.23385	0.93162
7	2	0.40677	0.36195	0.22603	0.93576
7	2	0.49171	0.42169	0.2479	0.91652
7	2	0.86821	0.773	0.23208	0.93113
7	2	0.42635	0.39007	0.22981	0.9122
7	2	0.42744	0.37145	0.21022	0.93605
7	2	0.58559	0.50922	0.25614	0.92165
7	2	0.47647	0.45987	0.21252	0.91985
7	2	0.32025	0.28932	0.24036	0.94171
7	2	0.20275	0.18316	0.17811	0.95106
7	2	0.36804	0.31618	0.23382	0.9078
7	2	0.33831	0.30075	0.21914	0.93324
7	2	0.49051	0.44331	0.23294	0.94331
7	2	0.66434	0.57662	0.2775	0.90565
7	2	0.43658	0.39845	0.24151	0.90031
7	2	0.32862	0.30556	0.19708	0.94823
7	2	0.43857	0.44089	0.21168	0.91963
7	2	0.82658	0.70788	0.24391	0.93545
7	2	0.26193	0.26203	0.15426	0.90341
7	3	0.37497	0.35635	0.25245	0.92967
7	3	0.33824	0.31086	0.24223	0.95556
7	3	0.44579	0.42276	0.20347	0.94719
7	3	0.65854	0.58223	0.28774	0.92136
7	3	0.37762	0.34942	0.20649	0.93687
7	3	0.55621	0.53073	0.24859	0.94524
7	3	0.25583	0.24041	0.22452	0.94175
7	3	0.28542	0.26351	0.21639	0.92706
7	3	0.30322	0.29112	0.21707	0.94698
7	3	0.46606	0.40285	0.26599	0.9276
7	3	0.3049	0.27786	0.24801	0.93249
8	1	0.43173	0.3943	0.20503	0.92016
8	1	0.69934	0.61553	0.20604	0.94803
8	1	0.24064	0.24882	0.13983	0.96447
8	1	0.4343	0.38964	0.21279	0.94941
8	1	0.56916	0.47214	0.21572	0.94377
8	1	1.1709	1.0046	0.22158	0.94742
8	1	0.75294	0.64001	0.20139	0.95159
8	1	0.84164	0.75704	0.20866	0.94575
8	1	0.7726	0.72941	0.20313	0.95412
8	1	0.99091	0.8341	0.21058	0.93777
8	1	1.1729	1	0.21071	0.94531
8	1	1.1017	0.95277	0.19733	0.94642
8	1	0.9487	0.84572	0.2003	0.94918
8	1	0.70063	0.5964	0.20332	0.94332
8	1	0.59944	0.54378	0.19736	0.95355
8	1	0.89877	0.83768	0.21691	0.94147
8	1	0.73863	0.67514	0.20379	0.94896
8	1	0.97379	0.8064	0.21116	0.9445
8	1	0.53193	0.48054	0.1836	0.94371
8	1	0.4986	0.4477	0.20423	0.93367
8	1	0.60754	0.53919	0.19315	0.94029
8	1	1.2075	1.0095	0.21662	0.95089
8	1	0.47995	0.41711	0.19512	0.95946
8	1	0.84469	0.74247	0.20738	0.93846
8	1	0.54667	0.49643	0.19215	0.93743
8	1	1.099	0.92205	0.19969	0.94613
8	1	1.2744	1.0778	0.21243	0.93722
8	1	1.1891	1.0021	0.21343	0.94205
8	1	0.77097	0.66131	0.23486	0.94266
8	1	0.95441	0.85059	0.21783	0.93736
8	1	0.90978	0.76536	0.20769	0.95263
8	1	0.66279	0.55172	0.20428	0.95603
8	1	0.91849	0.7848	0.21209	0.93461
8	1	0.94302	0.7902	0.20714	0.94881
8	1	0.8868	0.76608	0.21145	0.94131
8	2	-0.18825	-0.16268	0.19701	0.94869
8	2	0.15924	0.15319	0.14268	0.95269
8	2	0.33909	0.31378	0.21613	0.94559
8	2	0.53043	0.4503	0.17977	0.95099
8	2	0.29602	0.25975	0.19133	0.94988
8	2	0.72631	0.58863	0.23491	0.94274
8	2	0.54475	0.43706	0.22338	0.92932
8	2	0.42087	0.36716	0.22112	0.92097
8	2	0.41708	0.34617	0.22919	0.94881
8	2	0.25235	0.22241	0.27474	0.92886
8	2	1.0799	0.89098	0.23807	0.94197
8	2	0.19989	0.18158	0.1701	0.95678
8	2	0.084107	0.082278	0.14685	0.94791
8	2	1.1629	0.98753	0.20501	0.92234
8	2	0.15894	0.13805	0.19715	0.92987
8	2	0.16462	0.1436	0.20127	0.94849
8	2	0.45901	0.38315	0.19796	0.93339
8	2	0.29586	0.25065	0.17543	0.94558
8	2	0.34618	0.30496	0.22078	0.95117
8	2	0.41019	0.34953	0.20111	0.95013
8	2	0.69965	0.58278	0.22174	0.95073
8	2	0.53509	0.46972	0.19563	0.93594
8	2	0.43742	0.36268	0.20961	0.92788
8	2	0.61466	0.50561	0.21542	0.95069
8	2	0.21748	0.17693	0.21863	0.94192
8	2	0.22453	0.19763	0.18703	0.94486
8	2	0.38627	0.35532	0.18807	0.93976
8	2	0.39529	0.36336	0.19696	0.94922
8	2	0.28734	0.25627	0.19086	0.93802
8	2	0.51967	0.44142	0.20011	0.95063
8	2	0.3032	0.26848	0.1987	0.94467
8	2	0.46543	0.39529	0.20423	0.95096
8	2	0.44945	0.39799	0.19393	0.94328
8	2	0.3557	0.30223	0.20004	0.95086
8	2	0.94388	0.79049	0.22828	0.93999
8	2	0.47059	0.40918	0.20238	0.95356
8	2	0.11938	0.11219	0.14992	0.94793
8	2	0.43689	0.38648	0.18908	0.95221
8	2	0.93689	0.84974	0.19853	0.95216
8	2	0.50745	0.43631	0.22447	0.9452
8	2	0.50952	0.42808	0.20631	0.95238
8	2	0.51985	0.4559	0.1974	0.93813
8	2	0.46907	0.39888	0.19792	0.94504
8	2	0.75908	0.62772	0.22675	0.947
8	3	0.4503	0.39084	0.21999	0.94042
8	3	0.40478	0.34462	0.22227	0.93306
8	3	0.64958	0.60506	0.22621	0.93168
8	3	0.1195	0.11074	0.1994	0.92999
8	3	0.41944	0.39559	0.22451	0.92344
8	3	0.50149	0.46141	0.21176	0.94073
8	3	0.75294	0.67515	0.22042	0.92504
8	3	0.43207	0.36278	0.23088	0.93365
8	3	0.45698	0.4113	0.18894	0.95116
8	3	0.523	0.45292	0.23049	0.94009
8	3	0.57123	0.50008	0.21096	0.93974
8	3	0.24554	0.21777	0.24389	0.92437
8	3	0.69372	0.64121	0.22853	0.949
8	3	0.23746	0.2083	0.23279	0.94663
8	3	0.27099	0.25644	0.21519	0.93074
8	3	0.16138	0.15221	0.19587	0.9487
8	3	0.55378	0.51978	0.2224	0.94507
8	3	0.64392	0.54089	0.20852	0.93487
8	3	0.32091	0.29365	0.19829	0.92593
8	3	-0.024015	-0.02119	0.20712	0.94361
8	3	0.31001	0.28367	0.18284	0.94104
8	3	-0.056424	-0.051782	0.17988	0.94036
8	3	0.56694	0.51614	0.20227	0.9361
8	3	0.44826	0.39758	0.1957	0.95575
8	3	0.27444	0.24646	0.18984	0.93116
9	1	0.84002	0.73415	0.20108	0.93832
9	1	0.55691	0.53833	0.20265	0.92909
9	1	0.48797	0.45132	0.19549	0.9245
9	1	0.73766	0.68308	0.2029	0.94169
9	1	0.83482	0.71014	0.19598	0.93753
9	1	0.65821	0.61433	0.21216	0.91786
9	1	0.61941	0.58889	0.19417	0.93959
9	1	0.51866	0.45793	0.22639	0.91526
9	1	0.58894	0.5322	0.18787	0.94048
9	1	0.62629	0.58026	0.19564	0.92572
9	1	0.58038	0.52673	0.19144	0.93637
9	1	0.64611	0.60383	0.19017	0.93537
9	1	0.74875	0.68243	0.19384	0.93244
9	1	0.44667	0.42691	0.18448	0.93042
9	1	0.70963	0.61463	0.21447	0.93242
9	1	0.57629	0.51593	0.19752	0.92941
9	1	0.51162	0.44656	0.20823	0.92241
9	1	0.64864	0.59022	0.20998	0.93863
9	1	0.5689	0.54398	0.19355	0.93367
9	1	0.22045	0.20513	0.20552	0.9237
9	1	0.46936	0.43897	0.19383	0.93688
9	1	0.53976	0.49642	0.18148	0.92412
9	1	0.58073	0.5136	0.20466	0.92114
9	1	0.64274	0.58384	0.2077	0.91938
9	1	0.50369	0.4798	0.16628	0.94373
9	1	0.56836	0.53452	0.18891	0.92994
9	1	0.63008	0.57876	0.21721	0.92531
9	1	0.48719	0.47182	0.1739	0.9268
9	1	0.065032	0.065377	0.17496	0.93325
9	1	0.55359	0.52087	0.19178	0.94114
9	1	0.45376	0.42824	0.17386	0.93584
9	1	1.0034	0.86223	0.2284	0.91775
9	1	0.76653	0.73473	0.19756	0.94283
9	1	0.74679	0.6924	0.19397	0.94107
9	1	0.83042	0.75689	0.2303	0.93425
9	1	0.60322	0.57544	0.19661	0.93001
9	1	0.78032	0.72896	0.21758	0.92446
9	1	0.52506	0.47508	0.19575	0.932
9	1	0.93351	0.87449	0.1921	0.92121
9	1	0.93589	0.87364	0.22743	0.93161
9	1	0.80494	0.74485	0.23487	0.92301
9	1	0.56449	0.55292	0.16983	0.94023
9	1	0.77964	0.69041	0.20102	0.91641
9	1	0.75943	0.674	0.20051	0.93615
9	1	0.56677	0.50424	0.19316	0.93322
9	1	0.70677	0.63153	0.23788	0.8881
9	1	0.89165	0.79477	0.22822	0.92841
9	1	0.61289	0.57601	0.21486	0.92058
9	1	0.65255	0.59037	0.23552	0.92975
9	1	0.54607	0.49625	0.17995	0.93994
9	1	0.5415	0.50223	0.20828	0.92432
9	1	0.78882	0.71012	0.18767	0.94015
9	1	0.63497	0.59889	0.18522	0.93914
9	1	0.74998	0.68981	0.23185	0.92563
9	1	0.64851	0.59227	0.20688	0.92627
9	1	0.69003	0.64242	0.21676	0.93358
9	1	0.79531	0.7085	0.19987	0.93157
9	1	0.62142	0.56877	0.20329	0.93372
9	1	0.73409	0.6882	0.21473	0.93366
9	2	0.47049	0.49826	0.17384	0.93674
9	2	0.29248	0.29686	0.17723	0.92606
9	2	0.59622	0.53912	0.21207	0.91174
9	2	0.43195	0.41599	0.18742	0.92664
9	2	0.34721	0.33858	0.18255	0.91016
9	2	0.81252	0.72059	0.23563	0.91273
9	2	0.41945	0.39987	0.19725	0.91127
9	2	0.30385	0.31597	0.14329	0.94639
9	2	0.42594	0.40778	0.18294	0.94192
9	2	0.42699	0.38521	0.17424	0.9336
9	2	0.44323	0.39638	0.20549	0.92614
9	2	0.39916	0.42985	0.14104	0.92691
9	2	0.53632	0.49205	0.20052	0.92683
9	2	0.53329	0.49743	0.19395	0.91495
9	2	0.63389	0.58846	0.19333	0.93699
9	2	0.55028	0.52445	0.19485	0.92252
9	2	0.44107	0.42666	0.19059	0.91498
9	2	0.50978	0.47916	0.19981	0.93147
9	2	0.49645	0.47385	0.17715	0.92518
9	2	0.47329	0.45993	0.18378	0.91637
9	2	0.41279	0.38485	0.20765	0.92676
9	2	0.31723	0.29071	0.18335	0.9353
9	2	0.37091	0.39695	0.16989	0.91753
9	2	0.65603	0.5873	0.21119	0.92111
9	2	0.46605	0.44957	0.1921	0.93128
9	2	0.57206	0.49679	0.19689	0.93306
9	2	0.42568	0.39655	0.17532	0.9183
9	2	0.87054	0.77045	0.22969	0.92316
9	2	0.67943	0.61868	0.20181	0.93415
9	2	0.52177	0.49024	0.20513	0.91568
9	2	0.52259	0.50954	0.18223	0.92402
9	2	0.51978	0.49714	0.18025	0.93508
9	2	0.46592	0.42974	0.20085	0.93448
9	2	0.40219	0.41812	0.15265	0.92944
9	2	0.42275	0.40578	0.17801	0.93485
9	2	0.64522	0.62876	0.19352	0.93101
9	2	0.59602	0.57347	0.21535	0.93327
9	2	0.46191	0.44718	0.18008	0.93429
9	2	0.55294	0.55106	0.17243	0.93236
9	2	0.47575	0.46274	0.18087	0.93219
9	2	0.54218	0.50157	0.22224	0.90779
9	3	0.62512	0.57093	0.21366	0.93932
9	3	0.34764	0.30992	0.19075	0.93154
9	3	0.60375	0.5377	0.22543	0.91741
9	3	0.27626	0.26251	0.20159	0.94724
9	3	0.42444	0.40142	0.20402	0.95506
9	3	0.514	0.44552	0.22224	0.92407
9	3	0.48627	0.44772	0.23239	0.91017
9	3	0.68419	0.62293	0.21514	0.93217
9	3	0.42489	0.39573	0.20584	0.93495
9	3	0.76499	0.70421	0.23523	0.93304
9	3	0.74762	0.68544	0.20627	0.92664
9	3	0.45513	0.42831	0.20957	0.91862
9	3	0.53261	0.52035	0.19695	0.94746
9	3	0.50947	0.43754	0.23117	0.92029
9	3	0.42118	0.38437	0.20829	0.94065
9	3	0.65459	0.60315	0.24777	0.92584
9	3	0.601	0.57669	0.232	0.92777
9	3	0.57126	0.52627	0.23768	0.91864
9	3	0.45089	0.41613	0.19789	0.92366
9	3	0.38023	0.36582	0.21547	0.94305
9	3	0.44657	0.39703	0.17261	0.94103
9	3	0.80513	0.69587	0.26243	0.92916
9	3	0.38607	0.37546	0.18682	0.93405
9	3	0.50895	0.44026	0.27034	0.93961
9	3	0.46914	0.42562	0.23267	0.88849
9	3	0.51061	0.4819	0.19031	0.93292
9	3	0.77811	0.70852	0.20346	0.93704
9	3	0.65293	0.58554	0.23938	0.91851
9	3	0.61136	0.5446	0.20291	0.93027
9	3	0.51998	0.48149	0.21142	0.93031
9	3	0.21348	0.20583	0.12731	0.96004
9	3	0.32051	0.29031	0.17905	0.93786
9	3	0.41658	0.34447	0.22268	0.90539
9	3	-0.10711	-0.10063	0.13558	0.95313
9	3	0.63521	0.5756	0.20166	0.91746
9	3	0.33655	0.30942	0.20078	0.92053
9	3	0.1851	0.18966	0.34909	0.9423
9	3	0.32473	0.30179	0.17867	0.92464
9	3	0.31058	0.2977	0.19882	0.92319
9	3	0.50179	0.41155	0.22744	0.90241
9	3	0.36165	0.33093	0.18591	0.92651
9	3	0.4235	0.40342	0.21107	0.92909
9	3	0.19161	0.18095	0.18854	0.94413
9	3	0.42943	0.39232	0.19909	0.92319
9	3	0.38286	0.36672	0.19248	0.92956
9	3	0.66713	0.57595	0.20257	0.93801
9	3	0.32809	0.30962	0.17877	0.92548
9	3	0.38975	0.37699	0.21239	0.91861
9	3	0.44989	0.40286	0.16652	0.93069
9	3	0.52042	0.46196	0.23835	0.90651
9	3	0.62818	0.58062	0.21069	0.93174
9	3	0.30955	0.27628	0.22459	0.92513
