# Supplementary material for: How human runners regulate footsteps on uneven terrain
Source: eLife journal article supplement (doi:10.7554/elife.67177), 2023-02-22
Supplement: supp [file elife-67177-supp-v1.zip › elife_poa_e67177_Figure_6_source_data_2.csv]

terrain_type	relative_foot_speed	measured_leg_retraction_angular_velocity	measured_fore_aft_impulse	predicted_fore_aft_impulse_compliant_model	predicted_fore_aft_impulse_stiff_model	predicted_fore_aft_impulse_stiff_model_no_retraction
1	0.83393	-0.62241	0.12876	0.049922	0.20434	0.21285
1	0.43714	-1.9582	0.075002	0.036492	0.15455	0.18462
1	0.62472	-1.1533	0.082641	0.038611	0.15486	0.17422
1	0.43473	-1.8048	0.074967	0.033334	0.13828	0.16863
1	0.6777	-1.11	0.056574	0.039647	0.15746	0.17462
1	0.52299	-1.5035	0.067139	0.03449	0.13809	0.1631
1	0.61831	-1.2692	0.070932	0.036288	0.14259	0.16295
1	0.61178	-1.3369	0.045994	0.036257	0.14207	0.16247
1	0.66105	-1.0983	0.063285	0.036048	0.13852	0.15618
1	0.52314	-1.5151	0.074784	0.037253	0.15264	0.17715
1	0.41071	-1.8738	0.052233	0.03223	0.13103	0.16123
1	0.46266	-1.6669	0.061017	0.034307	0.14005	0.1679
1	0.55827	-1.3843	0.065205	0.036071	0.14397	0.16673
1	0.60495	-1.2827	0.061367	0.036607	0.14417	0.16481
1	0.43748	-1.744	0.060365	0.032065	0.12946	0.15876
1	0.74156	-0.82096	0.074611	0.039189	0.15152	0.1654
1	0.53355	-1.5478	0.050327	0.035911	0.14441	0.16852
1	0.7448	-0.83181	0.054794	0.037343	0.14093	0.15474
1	0.67403	-1.1075	0.1154	0.041511	0.16786	0.18469
1	0.34223	-2.0349	0.063304	0.032025	0.13432	0.168
1	0.53809	-1.4116	0.066861	0.033534	0.13257	0.15711
1	0.5354	-1.5745	0.049004	0.034791	0.13828	0.16257
1	0.51816	-1.5584	0.057328	0.032804	0.12989	0.15559
1	0.69226	-0.97891	0.064081	0.036342	0.13907	0.15578
1	0.60213	-1.2016	0.061211	0.035561	0.13953	0.16015
1	0.59305	-1.2702	0.060545	0.03485	0.1358	0.15688
1	0.73113	-0.88243	0.059127	0.037666	0.14288	0.15661
1	0.25519	-2.5747	0.066588	0.03594	0.16607	0.20608
1	0.21347	-2.496	0.051883	0.029644	0.13544	0.17915
1	0.11423	-2.6424	0.060353	0.027672	0.1303	0.17861
1	0.1945	-2.4283	0.06203	0.029752	0.13722	0.18164
1	0.24735	-2.4833	0.075621	0.032918	0.15315	0.19621
1	0.29445	-2.5123	0.066767	0.032834	0.14753	0.18657
1	0.25652	-2.3923	0.060837	0.032391	0.14738	0.18827
1	0.2543	-2.6674	0.066878	0.030604	0.13874	0.1809
1	0.29462	-2.1192	0.07039	0.031027	0.1384	0.17722
1	0.31606	-2.0531	0.076588	0.034234	0.15553	0.19394
1	0.26766	-2.2374	0.072984	0.033285	0.15296	0.19422
1	0.23065	-2.2694	0.057426	0.029087	0.13128	0.17373
1	0.27414	-2.2273	0.077748	0.031266	0.14107	0.18154
1	0.32869	-2.095	0.057827	0.033206	0.1494	0.18728
1	0.41433	-1.7436	0.063698	0.037511	0.16658	0.19882
1	0.22199	-2.4241	0.043328	0.029531	0.13605	0.18005
1	0.28785	-2.2747	0.058009	0.031636	0.1432	0.18363
1	0.532	-1.5397	0.057154	0.03991	0.17198	0.19737
1	0.083377	-2.8948	0.083351	0.027074	0.13075	0.18312
1	0.14483	-3.1226	0.050396	0.029947	0.14112	0.18967
1	0.33683	-2.1354	0.081902	0.038701	0.17809	0.21505
1	0.040643	-2.9661	0.066925	0.024597	0.11966	0.17385
1	0.23263	-2.4307	0.063895	0.029644	0.13521	0.17843
1	0.32342	-2.3555	0.060672	0.033656	0.1499	0.18707
1	0.32882	-2.1999	0.056464	0.033695	0.15065	0.18836
1	0.53589	-1.4357	0.057879	0.040369	0.17385	0.19864
1	0.47497	-1.7984	0.06623	0.033128	0.14019	0.17059
1	0.43292	-1.7355	0.059136	0.036061	0.15693	0.18803
1	0.17316	-2.6418	0.070314	0.028367	0.1317	0.17855
1	0.13809	-2.7011	0.050759	0.029061	0.13693	0.18534
1	0.29207	-2.3109	0.062885	0.049899	0.23987	0.28008
1	0.66087	-1.1136	0.07075	0.037588	0.15315	0.17269
1	0.072482	-3.0664	0.062627	0.024823	0.11799	0.17054
1	0.16043	-2.4998	0.062365	0.028199	0.13083	0.17722
1	0.43957	-1.8351	0.072886	0.034263	0.14761	0.17892
1	0.30921	-2.1942	0.067557	0.034442	0.15555	0.19352
1	0.42849	-1.8152	0.04323	0.033539	0.14275	0.17273
1	0.42571	-2.0542	0.063881	0.034722	0.15071	0.18223
1	0.46277	-1.6929	0.041609	0.034809	0.14741	0.17521
1	0.41792	-1.9976	0.034991	0.034397	0.14665	0.17659
1	0.64837	-1.236	0.054447	0.038247	0.15602	0.17476
1	0.36555	-2.2762	0.053134	0.032276	0.14137	0.17672
1	0.40403	-2.0925	0.063273	0.032137	0.1372	0.16919
1	0.41157	-2.1449	0.073486	0.036031	0.15888	0.19091
1	0.423	-2.0866	0.063289	0.033306	0.14355	0.17539
1	0.49901	-1.6752	0.038798	0.035235	0.1488	0.17567
1	0.4248	-2.0809	0.040321	0.036041	0.15676	0.18665
1	0.40749	-1.9873	0.064281	0.032853	0.1424	0.17475
1	0.40005	-2.1384	0.06776	0.03424	0.1499	0.18283
1	0.46564	-1.8749	0.039831	0.034803	0.14911	0.17785
1	0.41322	-2.145	0.067975	0.03438	0.15044	0.18275
1	0.50487	-1.6827	0.045717	0.035719	0.15284	0.1796
1	0.45207	-1.8236	0.044975	0.034189	0.14605	0.17508
1	0.56462	-1.3027	0.045302	0.034709	0.1423	0.16554
1	0.58136	-1.2739	0.052704	0.035463	0.14568	0.16828
1	0.41217	-2.047	0.064909	0.03281	0.14217	0.17453
1	0.52445	-1.4397	0.048968	0.035667	0.15009	0.17517
1	0.21971	-2.6634	0.044086	0.02314	0.10745	0.15437
1	0.1857	-2.8574	0.036397	0.0219	0.1009	0.14951
1	0.59995	-1.2445	0.03784	0.035871	0.14643	0.16774
1	0.38544	-2.167	0.0372	0.031497	0.13493	0.16815
1	0.58173	-1.3069	0.067318	0.038101	0.15865	0.1804
1	0.43518	-1.866	0.054694	0.034151	0.1464	0.17684
1	0.53949	-1.6053	0.045519	0.03616	0.15144	0.17619
1	0.36794	-2.0778	0.054084	0.031731	0.13699	0.17091
1	0.6504	-1.2246	0.047244	0.039136	0.16114	0.17973
1	0.36857	-2.2496	0.05726	0.033417	0.1453	0.179
1	0.48426	-1.9164	0.047405	0.035787	0.15308	0.1811
1	0.46739	-1.7848	0.069356	0.037362	0.16014	0.18723
1	0.52374	-1.73	0.04416	0.035685	0.14991	0.17568
1	0.48619	-1.9377	0.048792	0.035317	0.15037	0.17857
1	0.46832	-1.7196	0.060423	0.034978	0.14844	0.17618
1	0.44637	-2.0328	0.044395	0.033963	0.14533	0.17555
1	0.4658	-1.8541	0.045944	0.035426	0.15267	0.18164
1	0.43903	-1.8784	0.067846	0.036038	0.15655	0.18627
1	0.44166	-1.8943	0.041551	0.033357	0.14302	0.17346
1	0.66029	-1.0419	0.074347	0.04021	0.16666	0.18447
1	0.39686	-2.1934	0.038227	0.032123	0.13919	0.17208
1	0.48256	-1.8435	0.038273	0.033931	0.14307	0.17125
1	0.3721	-2.0562	0.07298	0.033595	0.14776	0.18167
1	0.28687	-2.5042	0.046488	0.029823	0.1315	0.17022
1	0.59659	-1.3007	0.061137	0.034985	0.14304	0.16591
1	0.54861	-1.3872	0.049007	0.033702	0.13789	0.1627
1	0.67803	-1.1104	0.054444	0.040396	0.16612	0.18306
1	0.40362	-1.9405	0.047809	0.030207	0.12698	0.15953
1	0.48117	-1.716	0.035539	0.031674	0.13129	0.15962
1	0.59299	-1.2367	0.078363	0.040983	0.16804	0.18718
1	0.40483	-1.817	0.080444	0.031468	0.13033	0.16179
1	0.52714	-1.5002	0.057936	0.036833	0.15113	0.17544
1	0.34844	-2.0914	0.063353	0.030202	0.12579	0.16077
1	0.35807	-2.0199	0.070285	0.029896	0.12441	0.1585
1	0.43042	-1.7767	0.062256	0.03597	0.15239	0.18218
1	0.37779	-2.0212	0.07207	0.033521	0.14224	0.1749
1	0.521	-1.493	0.072999	0.037064	0.15271	0.17716
1	0.56499	-1.3104	0.04619	0.033459	0.13237	0.15618
1	0.39957	-1.8296	0.063867	0.033024	0.13824	0.1693
1	0.37282	-1.9277	0.074411	0.032519	0.1373	0.16999
1	0.45023	-1.7207	0.045823	0.033029	0.13689	0.16674
1	0.34688	-2.0058	0.082826	0.031969	0.13645	0.1707
1	0.44773	-1.6575	0.069827	0.036549	0.15573	0.18534
1	0.74818	-0.68601	0.055207	0.039323	0.15095	0.16268
1	0.56762	-1.3002	0.046543	0.03658	0.14784	0.1705
1	0.53626	-1.4183	0.050813	0.034946	0.14257	0.16801
1	0.36397	-1.9444	0.071085	0.032135	0.13594	0.16897
1	0.30259	-1.9955	0.062152	0.030516	0.13081	0.16744
1	0.41022	-1.8156	0.065826	0.033629	0.14049	0.17076
1	0.44338	-1.7246	0.045827	0.033183	0.13748	0.16717
1	0.43392	-1.7159	0.047619	0.031576	0.13018	0.16097
1	0.39972	-1.8886	0.050996	0.03356	0.14139	0.17307
1	0.47411	-1.5736	0.079583	0.03683	0.15419	0.18085
1	0.36041	-2.0515	0.053632	0.026121	0.10135	0.13547
1	0.3715	-1.9363	0.074945	0.033275	0.14105	0.17355
1	0.4952	-1.5643	0.046334	0.035546	0.14793	0.17512
1	0.38923	-1.8858	0.087659	0.034506	0.14629	0.17773
1	0.57451	-1.2499	0.05529	0.033308	0.1296	0.15164
1	0.60823	-1.1841	0.066768	0.037756	0.15124	0.17088
1	0.49986	-1.5769	0.052296	0.033663	0.13633	0.16248
1	0.43142	-1.7537	0.054587	0.034582	0.14436	0.17374
1	0.41509	-1.7697	0.052938	0.035415	0.15019	0.18061
1	0.53719	-1.3337	0.05103	0.034121	0.13566	0.15927
1	0.64997	-1.0566	0.052084	0.039089	0.15553	0.1728
1	1.0123	-0.051884	0.061337	0.044475	0.16725	0.16817
1	0.5789	-1.2003	0.054788	0.036712	0.14756	0.1689
1	0.48136	-1.5574	0.058867	0.035611	0.14776	0.17537
1	0.41922	-1.7545	0.04613	0.033135	0.13778	0.16815
1	0.4205	-1.8506	0.081871	0.034688	0.1473	0.1786
1	0.68912	-0.85353	0.066141	0.042051	0.17031	0.18531
1	0.43635	-1.6612	0.067315	0.034918	0.14659	0.176
1	0.64071	-1.0484	0.050148	0.037491	0.14766	0.16587
1	0.68895	-1.0205	0.054105	0.039963	0.1602	0.17779
1	0.64945	-0.99179	0.047249	0.036928	0.14458	0.1622
1	0.35922	-1.8971	0.047081	0.029888	0.12363	0.15727
1	0.8093	-0.67586	0.061656	0.042795	0.17069	0.18262
1	0.54388	-1.3466	0.047068	0.035244	0.14156	0.16484
1	0.5194	-1.4215	0.045805	0.035799	0.14638	0.17084
1	0.37653	-2.0253	0.066596	0.03366	0.14424	0.17823
1	0.54889	-1.3148	0.046178	0.035754	0.1438	0.16659
1	0.27544	-2.2148	0.071868	0.030993	0.13656	0.17646
1	0.65008	-1.0368	0.044747	0.036886	0.14333	0.16072
1	0.47119	-1.5655	0.051533	0.034458	0.14259	0.17023
1	0.55277	-1.3345	0.045735	0.034217	0.13514	0.15808
1	0.083831	-2.7765	0.04684	0.030207	0.13834	0.18403
1	0.52004	-1.3955	0.05671	0.036799	0.1518	0.17572
1	0.1158	-2.8135	0.054536	0.029079	0.13503	0.18236
1	0.4901	-1.4622	0.050735	0.036104	0.14974	0.17472
1	0.073924	-2.9687	0.049534	0.025812	0.11982	0.16933
1	0.23418	-2.4851	0.055217	0.028005	0.12233	0.16355
1	0.23396	-2.4735	0.061341	0.028582	0.12662	0.16814
1	0.099079	-2.8138	0.051331	0.028002	0.12914	0.17636
1	0.12121	-2.6616	0.044011	0.028085	0.12753	0.17288
1	0.25621	-2.3908	0.057619	0.027162	0.11773	0.15845
1	0.21446	-2.4285	0.075736	0.030389	0.13717	0.17919
1	-0.010051	-3.4504	0.046994	0.020126	0.095503	0.15094
1	0.046261	-3.0583	0.049729	0.023462	0.10997	0.16177
1	0.20562	-2.4056	0.052599	0.029681	0.13266	0.17438
1	0.21652	-2.6274	0.061594	0.02875	0.12871	0.17127
1	0.17496	-2.6301	0.060715	0.029902	0.13614	0.1799
1	0.030464	-3.1381	0.048919	0.024866	0.11773	0.16988
1	0.13357	-2.7186	0.055678	0.027	0.12408	0.17111
1	0.090333	-2.9979	0.057336	0.02493	0.11492	0.16442
1	0.18157	-2.6416	0.060237	0.025193	0.11157	0.15647
1	0.48258	-1.6019	0.047416	0.036437	0.15345	0.18055
1	0.24129	-2.2338	0.056578	0.027402	0.1209	0.16233
1	0.30511	-2.1644	0.051374	0.032381	0.14146	0.17805
1	0.15418	-2.6927	0.059329	0.027876	0.12744	0.17317
1	0.017436	-3.0892	0.068165	0.027014	0.12857	0.18048
1	0.061841	-3.0787	0.057001	0.025702	0.12043	0.1708
1	0.18385	-2.5326	0.053707	0.024269	0.10543	0.15001
1	0.20362	-2.7348	0.054358	0.03045	0.13571	0.17772
1	0.21854	-2.4176	0.047983	0.027956	0.12376	0.16598
1	0.55997	-1.1909	0.065836	0.040577	0.16817	0.18813
1	0.33724	-2.0811	0.054295	0.035202	0.15434	0.18888
1	0.11949	-2.5858	0.048971	0.028817	0.13018	0.17463
1	0.12128	-2.8425	0.045234	0.026776	0.12197	0.16882
1	0.212	-2.5834	0.050788	0.026927	0.11777	0.16015
1	0.51158	-1.459	0.062833	0.039351	0.16603	0.18999
1	0.30536	-2.1324	0.06216	0.034593	0.15137	0.18636
1	0.097248	-2.9518	0.039038	0.023576	0.10755	0.15642
1	0.16132	-2.6106	0.044035	0.026937	0.12192	0.16747
1	0.35866	-2.0201	0.054553	0.030632	0.12923	0.16275
1	0.28129	-2.2537	0.056016	0.029386	0.12774	0.16576
1	0.36098	-1.9871	0.057211	0.033063	0.1416	0.17497
1	0.2711	-2.3485	0.062146	0.032404	0.14403	0.1828
1	0.25418	-2.1823	0.059111	0.031008	0.13525	0.17264
1	0.20281	-2.607	0.057757	0.031857	0.14503	0.18734
1	0.20013	-2.5958	0.052597	0.030631	0.1381	0.18057
1	0.13607	-2.715	0.038713	0.02511	0.11244	0.15865
1	0.25147	-2.3014	0.066949	0.027866	0.12255	0.16324
1	0.39822	-1.9221	0.071167	0.035748	0.15463	0.18594
1	0.15943	-2.6227	0.067119	0.029039	0.131	0.17464
1	0.30527	-2.069	0.061267	0.034575	0.15159	0.1865
1	0.19344	-2.7914	0.048859	0.041364	0.19432	0.23707
1	0.19508	-2.7335	0.058869	0.029843	0.13525	0.17893
1	0.3189	-2.2092	0.047853	0.029347	0.12293	0.15904
1	0.436	-1.4624	0.048167	0.036801	0.15352	0.1796
1	0.27117	-2.4692	0.054881	0.032018	0.14055	0.1788
1	0.10653	-2.8202	0.047087	0.026808	0.12444	0.17264
1	0.26697	-2.6064	0.066282	0.025582	0.11133	0.15064
1	0.21623	-3.1961	0.062622	0.022601	0.097304	0.13969
1	0.27479	-2.5843	0.065459	0.024168	0.10317	0.1425
1	0.25895	-2.5398	0.062838	0.02439	0.10549	0.1456
1	0.65339	-1.1049	0.056762	0.032622	0.12715	0.14516
1	0.22889	-2.6551	0.062134	0.024137	0.10639	0.14804
1	0.11661	-2.9593	0.043817	0.022969	0.10513	0.15235
1	0.47904	-1.6937	0.05525	0.030554	0.12564	0.15271
1	0.4957	-1.7231	0.044676	0.028084	0.11347	0.14166
1	0.61234	-1.2477	0.055363	0.032541	0.12817	0.1476
1	0.13422	-3.0037	0.061324	0.02171	0.098518	0.14533
1	0.40305	-1.8612	0.057698	0.028969	0.12135	0.15248
1	0.28621	-2.4739	0.062983	0.025407	0.10923	0.1477
1	0.57228	-1.3064	0.060208	0.029286	0.11265	0.13441
1	0.18778	-2.7449	0.054767	0.022807	0.10146	0.14543
1	0.50234	-1.6134	0.048716	0.03043	0.12338	0.149
1	0.16527	-2.8335	0.055243	0.023015	0.10379	0.14889
1	0.71518	-0.86689	0.056971	0.037635	0.15024	0.16319
1	0.52815	-1.53	0.047881	0.031109	0.12614	0.15056
1	0.2568	-2.6651	0.061356	0.02367	0.10144	0.14165
1	0.52153	-1.5691	0.054744	0.031611	0.12882	0.15337
1	0.22505	-2.5876	0.068062	0.026426	0.1193	0.16096
1	0.4648	-1.7477	0.06136	0.029946	0.12651	0.15629
1	0.00010536	-3.4167	0.0624	0.02031	0.096536	0.14936
1	0.23799	-2.6859	0.054745	0.023223	0.10013	0.14152
1	0.27333	-2.532	0.058001	0.027153	0.12017	0.1588
1	0.38323	-1.9356	0.049787	0.027286	0.11192	0.14349
1	0.31087	-2.7141	0.059506	0.027741	0.12024	0.15722
1	0.38385	-2.2202	0.05555	0.028621	0.12125	0.15428
1	0.75648	-0.6745	0.061749	0.038186	0.15073	0.16156
1	0.43454	-1.9257	0.052419	0.029102	0.12094	0.15131
1	0.51025	-1.6249	0.053322	0.028844	0.11432	0.14046
1	0.28574	-2.2972	0.059362	0.025171	0.10682	0.14412
1	0.39828	-1.9396	0.057802	0.032568	0.13922	0.16863
1	0.41079	-1.8887	0.058323	0.028481	0.11698	0.14689
1	0.32961	-2.1988	0.06203	0.026011	0.11007	0.14612
1	0.30644	-2.3802	0.057621	0.024727	0.10434	0.14177
1	0.50556	-1.4883	0.061366	0.034195	0.14378	0.16844
1	0.49024	-1.7644	0.061949	0.029943	0.12243	0.14976
1	0.33284	-2.1701	0.054494	0.030089	0.12921	0.16235
1	0.27765	-2.3673	0.05681	0.023498	0.099775	0.13889
1	0.3729	-2.1167	0.051158	0.026223	0.10851	0.14227
1	0.56231	-1.3748	0.055081	0.031642	0.12502	0.14636
1	0.37286	-2.1439	0.042847	0.02491	0.10008	0.13387
1	0.2305	-2.7819	0.048578	0.024195	0.10648	0.14842
1	0.75523	-0.67933	0.056304	0.037656	0.14728	0.15809
1	0.35018	-2.2271	0.050101	0.02675	0.11269	0.14773
1	0.3714	-1.9821	0.062526	0.027236	0.11432	0.14777
1	0.63346	-1.0851	0.070017	0.037668	0.15478	0.17136
1	0.2171	-2.7727	0.049545	0.025035	0.1118	0.15396
1	0.67891	-0.92837	0.052573	0.040798	0.16073	0.17562
1	0.6224	-1.2309	0.055962	0.036793	0.14634	0.16771
1	0.56624	-1.2374	0.052066	0.04015	0.1635	0.18394
1	0.50342	-1.5957	0.045019	0.03512	0.14519	0.17317
1	0.59351	-1.1819	0.05603	0.040524	0.16447	0.18365
1	0.52842	-1.6026	0.059795	0.038273	0.16071	0.18731
1	0.48997	-1.7441	0.056495	0.037656	0.15928	0.18802
1	0.53028	-1.2687	0.051692	0.039512	0.1623	0.18452
1	0.54757	-1.5422	0.054874	0.039184	0.16369	0.18905
1	0.50398	-1.6298	0.047901	0.037557	0.15779	0.18561
1	0.45784	-1.9238	0.053197	0.039645	0.17022	0.19986
1	0.36321	-1.9867	0.070817	0.036838	0.15739	0.18966
1	0.69036	-0.86937	0.048206	0.041239	0.16246	0.17647
1	0.99858	-0.08558	0.061074	0.043866	0.16305	0.16442
1	0.61177	-1.3163	0.054592	0.04047	0.16623	0.18805
1	0.45512	-1.6767	0.051267	0.03751	0.15589	0.18356
1	0.68994	-1.0787	0.056068	0.041908	0.16934	0.18696
1	0.7232	-0.7351	0.047839	0.043219	0.17138	0.18371
1	0.71332	-1.0652	0.073284	0.043575	0.17772	0.19449
1	0.70734	-1.0078	0.061098	0.041503	0.16646	0.18317
1	0.64117	-1.2818	0.065931	0.042701	0.17592	0.19594
1	0.58939	-1.4451	0.064737	0.041253	0.17187	0.195
1	0.53306	-1.5491	0.058915	0.03944	0.16476	0.19047
1	0.67379	-0.89302	0.05455	0.040685	0.161	0.17603
1	0.64665	-1.2307	0.07468	0.04437	0.18463	0.20433
1	0.61757	-1.4243	0.060781	0.042107	0.17427	0.19571
1	0.61852	-1.0354	0.049132	0.039213	0.15651	0.17454
1	0.72256	-0.77573	0.057786	0.044191	0.17652	0.18865
1	0.69772	-1.0661	0.074006	0.041838	0.16883	0.18614
1	0.68914	-0.88157	0.046082	0.04192	0.16664	0.18084
1	0.49954	-1.5513	0.062277	0.039884	0.16576	0.18991
1	0.3943	-2.1047	0.079836	0.034144	0.14934	0.18151
1	0.61553	-1.4228	0.051969	0.033812	0.13333	0.15428
1	0.24882	-2.347	0.049362	0.023756	0.10184	0.14302
1	0.38964	-2.1463	0.050585	0.031204	0.13138	0.16355
1	0.47214	-2.0413	0.056227	0.032438	0.13382	0.16208
1	1.0046	-0.089351	0.052584	0.042338	0.15952	0.1608
1	0.64001	-1.3334	0.048414	0.03439	0.13448	0.15346
1	0.75704	-0.86097	0.054251	0.036827	0.14134	0.15429
1	0.72941	-0.89453	0.045882	0.036045	0.13829	0.15243
1	0.8341	-0.596	0.062229	0.038969	0.14843	0.15681
1	1	-0.016173	0.054694	0.042667	0.16041	0.16064
1	0.95277	-0.18604	0.053582	0.039213	0.14306	0.14576
1	0.84572	-0.57654	0.050818	0.036425	0.13369	0.1423
1	0.5964	-1.4948	0.056677	0.034704	0.13921	0.16051
1	0.54378	-1.5966	0.046452	0.033786	0.13769	0.16197
1	0.83768	-0.55051	0.058527	0.03994	0.15426	0.16282
1	0.67514	-1.1392	0.051043	0.035237	0.13754	0.15497
1	0.8064	-0.75638	0.055496	0.038704	0.1494	0.15987
1	0.48054	-1.8529	0.056293	0.031965	0.1323	0.16046
1	0.4477	-1.9905	0.066332	0.032635	0.13753	0.16745
1	0.53919	-1.6748	0.059706	0.033644	0.13787	0.16282
1	1.0095	-0.034204	0.049106	0.038983	0.13872	0.1392
1	0.41711	-2.1221	0.041489	0.029496	0.12034	0.15128
1	0.74247	-0.95204	0.06154	0.037634	0.14749	0.16149
1	0.49643	-1.7822	0.062566	0.032794	0.13561	0.16278
1	0.92205	-0.32462	0.053868	0.038763	0.14266	0.14723
1	1.0778	-0.27264	0.062778	0.038295	0.13879	0.14264
1	1.0021	-0.003225	0.057954	0.040041	0.1445	0.14454
1	0.66131	-1.065	0.057341	0.037726	0.14871	0.16388
1	0.85059	-0.54565	0.062635	0.041651	0.16384	0.17195
1	0.76536	-0.85556	0.047369	0.036594	0.13884	0.15088
1	0.55172	-1.6933	0.043967	0.03298	0.1317	0.15529
1	0.7848	-0.80369	0.065388	0.039529	0.15553	0.167
1	0.7902	-0.79455	0.051194	0.036145	0.13505	0.14619
1	0.76608	-0.90049	0.058686	0.03812	0.14903	0.16203
1	0.73415	-0.84045	0.061684	0.039645	0.15714	0.17038
1	0.53833	-1.3639	0.07091	0.036847	0.15347	0.17721
1	0.45132	-1.7243	0.075501	0.034917	0.14866	0.17743
1	0.68308	-1.1523	0.058313	0.03677	0.1474	0.16662
1	0.71014	-0.95974	0.062469	0.039161	0.15635	0.17108
1	0.61433	-1.3959	0.082141	0.038718	0.1636	0.18701
1	0.58889	-1.234	0.060407	0.035818	0.14456	0.16573
1	0.45793	-2.0635	0.084744	0.037571	0.1671	0.19972
1	0.5322	-1.4966	0.05952	0.034815	0.14302	0.16746
1	0.58026	-1.2727	0.07428	0.037566	0.15506	0.17634
1	0.52673	-1.4956	0.063629	0.036713	0.15429	0.1788
1	0.60383	-1.4161	0.064628	0.035429	0.14589	0.16981
1	0.68243	-0.97922	0.067562	0.037783	0.14995	0.16606
1	0.42691	-1.9313	0.069577	0.033017	0.14385	0.17725
1	0.61463	-1.5153	0.067581	0.038048	0.15973	0.1833
1	0.51593	-1.5487	0.070589	0.036831	0.15523	0.18024
1	0.44656	-2.1561	0.077592	0.036068	0.16095	0.1948
1	0.59022	-1.5584	0.061366	0.038526	0.16514	0.19063
1	0.54398	-1.6003	0.066333	0.035727	0.15217	0.17979
1	0.20513	-2.5095	0.076305	0.031841	0.14616	0.18819
1	0.43897	-2.0036	0.06312	0.033903	0.14905	0.18287
1	0.49642	-1.5568	0.075879	0.036014	0.15256	0.17848
1	0.5136	-1.8589	0.078856	0.037159	0.16242	0.19202
1	0.58384	-1.2895	0.080624	0.040089	0.1691	0.19017
1	0.4798	-1.7421	0.056268	0.030602	0.12615	0.15629
1	0.53452	-1.4199	0.070057	0.036818	0.1546	0.17873
1	0.57876	-1.5736	0.074694	0.039479	0.17085	0.19679
1	0.47182	-1.5652	0.073202	0.034891	0.14836	0.17585
1	0.065377	-2.7871	0.066746	0.026489	0.12766	0.17845
1	0.52087	-1.7069	0.058857	0.03463	0.14746	0.17646
1	0.42824	-1.7392	0.064156	0.033795	0.14467	0.17443
1	0.86223	-0.37792	0.082247	0.044829	0.17763	0.18344
1	0.73473	-0.77422	0.057172	0.038425	0.15021	0.16359
1	0.6924	-0.9335	0.058928	0.037784	0.14933	0.16496
1	0.75689	-0.89749	0.065754	0.04058	0.16322	0.17785
1	0.57544	-1.4779	0.069987	0.035866	0.15006	0.17549
1	0.72896	-0.773	0.07554	0.041608	0.16771	0.18067
1	0.47508	-1.9154	0.068	0.033344	0.14236	0.17363
1	0.87449	-0.50641	0.07879	0.039904	0.15321	0.16177
1	0.87364	-0.46939	0.06839	0.042619	0.16718	0.17502
1	0.74485	-0.93435	0.076987	0.041142	0.16728	0.18273
1	0.55292	-1.3266	0.059773	0.034819	0.14306	0.16664
1	0.69041	-1.2153	0.08359	0.038382	0.15728	0.17667
1	0.674	-1.0069	0.063852	0.039248	0.15837	0.17447
1	0.50424	-1.5768	0.066783	0.038351	0.16501	0.19034
1	0.63153	-1.4548	0.1119	0.043701	0.191	0.2142
1	0.79477	-0.82625	0.071589	0.043073	0.1761	0.18928
1	0.57601	-1.5382	0.079422	0.038644	0.16611	0.19207
1	0.59037	-1.5199	0.07025	0.040344	0.17326	0.19781
1	0.49625	-1.6397	0.060063	0.034504	0.1449	0.17188
1	0.50223	-1.8252	0.075683	0.037747	0.1667	0.19715
1	0.71012	-0.89196	0.05985	0.038235	0.15093	0.16545
1	0.59889	-1.2034	0.060864	0.037014	0.15141	0.17194
1	0.68981	-1.1655	0.074374	0.041633	0.1746	0.19377
1	0.59227	-1.2427	0.073732	0.040096	0.16839	0.18882
1	0.64242	-1.3077	0.066424	0.038663	0.16116	0.18301
1	0.7085	-0.87568	0.06843	0.040865	0.16549	0.17955
1	0.56877	-1.2922	0.066276	0.039978	0.16899	0.19029
1	0.6882	-0.89322	0.066338	0.041645	0.17056	0.18559
2	0.44376	-1.9443	0.070381	0.036808	0.15571	0.18558
2	0.68685	-1.0045	0.068915	0.036919	0.14179	0.1582
2	0.53824	-1.5132	0.051797	0.033068	0.12935	0.15383
2	0.39739	-2.1361	0.07904	0.035858	0.15396	0.18655
2	0.39081	-1.9424	0.064379	0.029669	0.12147	0.15477
2	0.40298	-1.9242	0.068813	0.036249	0.15461	0.18635
2	0.32656	-1.7731	0.056494	0.031538	0.13594	0.17228
2	0.36516	-2.2215	0.080754	0.032895	0.13973	0.17412
2	0.3195	-2.1599	0.06448	0.027853	0.11613	0.15343
2	0.38021	-2.0058	0.07379	0.035505	0.153	0.18641
2	0.47012	-1.7444	0.075919	0.037377	0.15657	0.18455
2	0.32613	-2.2876	0.057652	0.032602	0.14007	0.17645
2	0.34282	-2.0701	0.072809	0.030009	0.12635	0.16229
2	0.42084	-1.8072	0.057232	0.029955	0.12062	0.15215
2	0.46059	-1.6341	0.068432	0.032596	0.1322	0.16107
2	0.50166	-1.4718	0.070313	0.037385	0.153	0.17811
2	0.38509	-1.947	0.069509	0.033613	0.14198	0.17501
2	0.41087	-1.8618	0.077213	0.034747	0.1444	0.17485
2	0.45594	-1.7692	0.063609	0.032772	0.13328	0.16226
2	0.56906	-1.3871	0.058552	0.036878	0.14782	0.17008
2	0.3894	-2.0479	0.059859	0.033	0.13897	0.17194
2	0.41787	-1.8679	0.053997	0.032691	0.13449	0.16542
2	0.48716	-1.5391	0.071392	0.034823	0.14356	0.17095
2	0.28206	-2.1044	0.061079	0.02827	0.11972	0.15843
2	0.40402	-1.8946	0.058073	0.033184	0.13717	0.1682
2	0.46817	-1.8861	0.075669	0.039053	0.16539	0.19332
2	0.39857	-1.9181	0.053871	0.03227	0.13269	0.1645
2	0.22115	-2.5012	0.055625	0.026109	0.11175	0.15369
2	0.45533	-1.7512	0.050344	0.033134	0.13501	0.16425
2	0.46242	-1.621	0.065649	0.035918	0.14953	0.17764
2	0.36637	-2.0288	0.062823	0.03221	0.13612	0.17006
2	0.52202	-1.5142	0.057144	0.034536	0.13838	0.16359
2	0.48499	-1.6346	0.069329	0.033739	0.13723	0.16494
2	0.61984	-1.167	0.063937	0.036574	0.14427	0.16446
2	0.53343	-1.4986	0.069374	0.036651	0.14944	0.17421
2	0.70965	-0.89745	0.060581	0.038169	0.14747	0.1626
2	0.4038	-1.8885	0.056398	0.033429	0.13946	0.17146
2	0.60692	-1.2387	0.049758	0.034817	0.13514	0.15618
2	0.31785	-2.1187	0.065615	0.03169	0.13532	0.17157
2	0.51035	-1.4962	0.064518	0.034831	0.14049	0.16616
2	0.60132	-1.3002	0.062488	0.035784	0.14096	0.16223
2	0.3445	-2.0853	0.049393	0.03118	0.13071	0.16578
2	0.29744	-2.1352	0.050378	0.029058	0.12128	0.15873
2	0.43481	-1.8215	0.070858	0.033267	0.13784	0.16852
2	0.54484	-1.4297	0.055354	0.036291	0.14626	0.17021
2	0.21766	-2.4256	0.062952	0.032294	0.15126	0.19532
2	0.35715	-2.0539	0.079704	0.036327	0.16305	0.19809
2	0.17963	-2.6572	0.073914	0.030254	0.14305	0.18979
2	0.36458	-2.1431	0.06274	0.035448	0.15742	0.19213
2	0.29698	-2.3546	0.073521	0.031413	0.13987	0.17701
2	0.4786	-1.6786	0.072781	0.035522	0.14994	0.17663
2	0.26395	-2.1898	0.05182	0.028016	0.12324	0.1618
2	0.21213	-2.5554	0.04084	0.025863	0.1151	0.15749
2	0.27444	-2.1563	0.060479	0.031029	0.13815	0.17542
2	0.28747	-2.1637	0.047392	0.028902	0.12596	0.16308
2	0.36622	-2.0628	0.069381	0.032828	0.14334	0.17678
2	0.29519	-2.4042	0.055665	0.02976	0.13112	0.16865
2	0.32311	-2.1275	0.067022	0.031826	0.13922	0.17388
2	0.27766	-2.6335	0.070887	0.033565	0.15243	0.19071
2	0.4495	-1.9344	0.073448	0.049047	0.22776	0.2583
2	0.40656	-2.0163	0.066295	0.034494	0.14933	0.18041
2	0.19349	-2.6409	0.057266	0.027988	0.12729	0.16986
2	0.27429	-2.3989	0.066106	0.03092	0.13819	0.17669
2	-0.0083134	-3.2518	0.06247	0.023743	0.11462	0.16753
2	0.67035	-1.0629	0.058073	0.039197	0.16054	0.17809
2	0.33891	-2.1506	0.072465	0.032974	0.14536	0.18031
2	0.27298	-2.4173	0.068225	0.030669	0.13631	0.17475
2	0.50074	-1.6466	0.077954	0.035112	0.14817	0.17438
2	0.082878	-2.7249	0.078214	0.029786	0.14347	0.19144
2	0.19126	-2.5742	0.070384	0.029456	0.13176	0.17508
2	0.25106	-2.3855	0.080382	0.032405	0.14345	0.18236
2	0.3768	-1.873	0.069317	0.034035	0.14551	0.17791
2	0.38433	-1.9595	0.071717	0.037414	0.16158	0.19351
2	0.46967	-1.5838	0.066127	0.035178	0.14564	0.17323
2	0.2975	-2.1222	0.077982	0.032785	0.14274	0.17916
2	0.31323	-2.1359	0.072938	0.032086	0.13944	0.17651
2	0.33385	-2.1674	0.073755	0.033977	0.14774	0.18277
2	0.36855	-2.0266	0.080512	0.035093	0.15061	0.18282
2	0.29381	-2.361	0.051296	0.030712	0.13217	0.16967
2	0.31751	-1.9118	0.05147	0.029935	0.12796	0.16456
2	0.32024	-1.974	0.064919	0.032863	0.14158	0.17635
2	0.42074	-1.7972	0.072825	0.036149	0.15404	0.1845
2	0.2828	-2.222	0.074083	0.031036	0.13574	0.17399
2	0.32612	-2.1872	0.062099	0.031535	0.13624	0.17302
2	0.32577	-2.0676	0.059776	0.033034	0.14183	0.17622
2	0.30974	-2.0959	0.073062	0.033638	0.14703	0.18269
2	0.39711	-1.8738	0.074212	0.034181	0.14543	0.17745
2	0.3164	-2.2059	0.067475	0.033549	0.14617	0.18198
2	0.25153	-2.41	0.062005	0.029132	0.12867	0.16977
2	0.304	-2.1267	0.054512	0.031459	0.13668	0.17387
2	0.28827	-2.1551	0.054259	0.031283	0.13682	0.17477
2	0.34279	-2.0739	0.067644	0.031742	0.1362	0.17153
2	0.50572	-1.5704	0.073758	0.038623	0.16215	0.1876
2	0.36423	-2.0113	0.065204	0.032913	0.14115	0.17568
2	0.30517	-1.9529	0.067774	0.030485	0.13311	0.17095
2	0.36823	-1.7932	0.068417	0.031483	0.13324	0.16616
2	0.26946	-2.1977	0.056117	0.030839	0.13577	0.17483
2	0.34894	-2.0938	0.054154	0.031316	0.13521	0.17098
2	0.46331	-2.0158	0.072691	0.038319	0.16208	0.19032
2	0.30116	-2.142	0.067577	0.031073	0.13437	0.17174
2	0.3201	-2.2095	0.069147	0.033272	0.14453	0.18059
2	0.30462	-2.1748	0.057708	0.030576	0.1313	0.1681
2	0.3348	-2.0284	0.11033	0.036928	0.16229	0.19665
2	0.34602	-2.0984	0.068121	0.033316	0.14368	0.17847
2	0.2994	-2.2909	0.057438	0.031273	0.13509	0.17218
2	0.48576	-1.6117	0.059571	0.036945	0.15417	0.18072
2	0.35892	-2.173	0.07009	0.033208	0.14277	0.17716
2	0.34238	-2.3435	0.054808	0.030453	0.1281	0.16301
2	0.14334	-2.0643	0.066895	0.021625	0.095768	0.14201
2	0.3159	-2.0332	0.080508	0.031027	0.13489	0.17246
2	0.27473	-2.1795	0.053045	0.029174	0.1262	0.16456
2	0.39293	-1.9133	0.068005	0.031838	0.13419	0.16719
2	0.27407	-2.2376	0.063243	0.030197	0.13136	0.17034
2	0.46364	-1.6628	0.060513	0.036193	0.15266	0.18124
2	0.27661	-2.1603	0.072991	0.032442	0.14283	0.18085
2	0.52042	-1.4715	0.080873	0.040733	0.17193	0.1962
2	0.45586	-1.6309	0.060636	0.035785	0.15087	0.1793
2	0.48354	-1.6058	0.063203	0.037167	0.15582	0.18255
2	0.60091	-1.2751	0.067626	0.038442	0.1581	0.18084
2	0.33869	-2.0345	0.06461	0.034925	0.15271	0.18792
2	0.30832	-2.2425	0.061668	0.030681	0.13215	0.16897
2	0.15806	-2.5396	0.068919	0.029038	0.13123	0.17599
2	0.21152	-2.2186	0.068426	0.028951	0.12942	0.17233
2	0.59027	-1.093	0.067048	0.038714	0.15702	0.17704
2	0.25874	-2.2559	0.068128	0.033121	0.14723	0.1866
2	0.49353	-1.4979	0.071678	0.037685	0.15779	0.18359
2	0.31395	-2.1924	0.079612	0.035394	0.15619	0.19247
2	0.15967	-3.1006	0.045947	0.023532	0.10376	0.14984
2	0.27732	-2.1841	0.048847	0.029164	0.12526	0.16241
2	-0.13535	-3.5076	0.065317	0.025329	0.12617	0.18512
2	0.20167	-2.5014	0.066225	0.032892	0.14974	0.19172
2	0.074031	-3.0775	0.052825	0.026409	0.12196	0.17086
2	0.054149	-3.0304	0.054645	0.026016	0.12282	0.17437
2	0.40864	-1.7544	0.050481	0.033349	0.13946	0.16858
2	0.064174	-3.1895	0.048832	0.02582	0.12075	0.17197
2	0.31285	-2.0932	0.050978	0.030735	0.13143	0.16673
2	0.26256	-2.2262	0.047826	0.031396	0.1374	0.17595
2	0.585	-1.141	0.079467	0.040889	0.16942	0.18868
2	-0.017841	-3.5858	0.053709	0.023209	0.11162	0.16726
2	0.58131	-1.3242	0.056483	0.038792	0.16138	0.18355
2	0.034815	-3.7479	0.049487	0.02022	0.092049	0.14537
2	0.0059005	-3.3304	0.061649	0.024234	0.11646	0.17081
2	-0.040738	-3.1509	0.052557	0.021741	0.10347	0.15855
2	0.20228	-2.4274	0.059017	0.030115	0.13328	0.17375
2	0.19741	-2.5482	0.08441	0.032142	0.14399	0.18426
2	0.19354	-2.9274	0.069845	0.030899	0.13972	0.18271
2	0.47174	-1.5385	0.050801	0.036242	0.15237	0.17888
2	-0.18465	-3.5808	0.044764	0.016303	0.084536	0.14879
2	0.32744	-2.0966	0.053926	0.030915	0.13194	0.1669
2	0.059149	-2.7304	0.0509	0.0248	0.11474	0.16493
2	0.074435	-2.8499	0.056189	0.02694	0.12529	0.17448
2	0.16167	-2.424	0.047111	0.025456	0.11351	0.15904
2	-0.1898	-3.6072	0.044686	0.016186	0.083476	0.14799
2	0.087034	-2.6634	0.046259	0.023908	0.10917	0.15833
2	-0.052526	-3.3179	0.057891	0.023863	0.11547	0.17135
2	0.068997	-3.0196	0.054947	0.024365	0.11292	0.16362
2	0.051849	-2.8409	0.046518	0.022629	0.10594	0.15823
2	0.052592	-2.8763	0.040901	0.022911	0.10589	0.157
2	0.17401	-2.915	0.072281	0.030318	0.13789	0.18217
2	0.35433	-1.9921	0.041828	0.032128	0.13747	0.17166
2	0.085914	-2.7625	0.039921	0.023905	0.10937	0.1589
2	0.034456	-3.1016	0.056473	0.027434	0.13136	0.18309
2	-0.0065194	-3.229	0.047386	0.024187	0.11532	0.16917
2	0.014081	-3.1528	0.046126	0.023509	0.11099	0.16395
2	0.13511	-3.2216	0.052968	0.026484	0.12068	0.16791
2	0.18955	-3.0589	0.055957	0.030045	0.13614	0.18017
2	0.086351	-2.7667	0.054037	0.026144	0.11986	0.16781
2	0.30832	-2.061	0.054945	0.032091	0.1378	0.17214
2	0.21595	-2.4734	0.051589	0.028515	0.12553	0.16685
2	0.56563	-1.2173	0.059009	0.03875	0.15783	0.17711
2	0.16748	-2.718	0.052435	0.027673	0.12559	0.17119
2	0.24597	-2.5063	0.077875	0.033405	0.15197	0.19243
2	0.0079924	-3.1805	0.04347	0.021271	0.099658	0.15316
2	0.21216	-2.5797	0.064784	0.030148	0.13666	0.17925
2	0.089812	-2.9243	0.049688	0.025814	0.11861	0.16722
2	0.21561	-2.6225	0.047337	0.028435	0.12647	0.16916
2	0.095096	-2.8768	0.042574	0.023088	0.1055	0.1553
2	0.31331	-2.2336	0.047957	0.031229	0.1357	0.17261
2	-0.074044	-3.3165	0.056016	0.022178	0.10839	0.16542
2	0.52198	-1.4762	0.065075	0.038838	0.16361	0.18783
2	-0.099157	-3.5061	0.037828	0.017336	0.085739	0.14612
2	-0.032055	-3.1445	0.049213	0.02324	0.11172	0.16673
2	0.054146	-2.884	0.045437	0.024391	0.1141	0.1654
2	0.064868	-2.8326	0.060453	0.027403	0.12709	0.17578
2	0.038872	-2.7344	0.051185	0.02478	0.11612	0.1671
2	0.40783	-1.6752	0.041061	0.034745	0.1462	0.17522
2	0.16976	-2.4601	0.074458	0.02948	0.13337	0.17659
2	0.48054	-1.4587	0.053756	0.036907	0.15495	0.18092
2	0.084094	-2.7991	0.052344	0.026062	0.12059	0.16944
2	0.1151	-2.8115	0.049026	0.025035	0.11356	0.16112
2	0.45428	-1.4972	0.061286	0.038141	0.16241	0.18898
2	0.30371	-2.44	0.06624	0.034502	0.15303	0.18982
2	0.064554	-2.9549	0.04511	0.025552	0.11859	0.16849
2	0.53158	-1.3269	0.048938	0.038163	0.15868	0.18193
2	0.2737	-2.3139	0.049887	0.029431	0.12709	0.16535
2	0.21974	-2.4992	0.0559	0.028968	0.12803	0.16939
2	0.18412	-2.6053	0.063374	0.028931	0.13035	0.17418
2	0.2373	-2.528	0.053868	0.028534	0.13001	0.1707
2	0.17054	-3.0997	0.057315	0.025658	0.11873	0.16338
2	0.27326	-2.6317	0.053531	0.029439	0.13284	0.17218
2	0.17977	-2.8058	0.047234	0.025553	0.11696	0.16114
2	0.27343	-2.5864	0.058623	0.027942	0.12491	0.16437
2	0.21419	-2.7988	0.058373	0.026572	0.1209	0.16356
2	0.17152	-2.9595	0.055624	0.023878	0.10838	0.15348
2	0.15774	-2.8345	0.053047	0.021024	0.094195	0.14057
2	0.1634	-3.0326	0.052712	0.021297	0.094868	0.14124
2	0.24652	-2.6453	0.047638	0.027048	0.12179	0.16255
2	0.17085	-2.8333	0.051684	0.024586	0.1123	0.15738
2	0.29104	-2.3932	0.04196	0.025005	0.10715	0.14589
2	0.23498	-2.6982	0.053598	0.026236	0.1178	0.15916
2	0.4778	-1.8824	0.052429	0.030335	0.12483	0.15319
2	0.42084	-1.9674	0.042073	0.026597	0.10683	0.13829
2	0.30496	-2.4841	0.056074	0.031378	0.13568	0.17391
2	0.32501	-2.0798	0.047907	0.033193	0.14121	0.17516
2	0.375	-2.1085	0.057348	0.035131	0.15204	0.18644
2	0.43559	-1.7613	0.05486	0.039318	0.16671	0.19407
2	0.4028	-1.8187	0.08496	0.041173	0.17807	0.20664
2	0.29937	-2.4971	0.071717	0.036492	0.16161	0.1995
2	0.39137	-1.8967	0.062699	0.040132	0.17319	0.20284
2	0.17102	-2.6462	0.05559	0.029137	0.1304	0.17397
2	0.41561	-1.8709	0.06368	0.039012	0.1667	0.19528
2	0.30535	-2.4304	0.092604	0.034413	0.15178	0.19027
2	0.30643	-2.4614	0.06102	0.036348	0.16059	0.19793
2	0.36037	-2.2784	0.079072	0.040294	0.1784	0.21314
2	0.27168	-2.4991	0.065333	0.03265	0.14422	0.18418
2	0.33146	-2.2591	0.097047	0.03993	0.17874	0.21495
2	0.44041	-1.7064	0.05875	0.04158	0.17809	0.20483
2	0.3316	-2.2444	0.088048	0.039487	0.17603	0.21216
2	0.18861	-2.7426	0.06202	0.031873	0.14374	0.18764
2	0.37561	-2.1449	0.064163	0.039096	0.17079	0.20451
2	0.34659	-2.0542	0.093115	0.041554	0.18329	0.21486
2	0.44869	-1.6786	0.062737	0.039631	0.16788	0.19483
2	0.37397	-2.1328	0.056792	0.037509	0.16439	0.19884
2	0.37189	-1.9541	0.053135	0.036986	0.15783	0.18881
2	0.44917	-1.7255	0.063922	0.038069	0.16197	0.19191
2	0.51783	-1.4081	0.055378	0.040752	0.16996	0.19299
2	0.39645	-2.202	0.070436	0.041177	0.18075	0.21326
2	0.50362	-1.4809	0.069703	0.042061	0.17723	0.20064
2	0.37332	-1.8108	0.067779	0.03703	0.15877	0.18967
2	0.41911	-1.6744	0.066302	0.038427	0.16343	0.19186
2	0.32664	-2.0489	0.046524	0.035166	0.15127	0.18479
2	0.41079	-2.0242	0.064919	0.039282	0.17056	0.20266
2	0.51215	-1.4099	0.068481	0.04095	0.17076	0.19362
2	0.34776	-2.145	0.06367	0.038501	0.17003	0.20533
2	0.3028	-2.1065	0.054242	0.034311	0.14925	0.1844
2	0.37333	-2.1677	0.076824	0.039154	0.17197	0.20644
2	0.51232	-1.4182	0.10576	0.043527	0.1846	0.20754
2	0.38932	-1.9969	0.096807	0.039065	0.17258	0.2063
2	0.30365	-2.2202	0.055072	0.037802	0.16476	0.19945
2	0.28953	-2.3743	0.073042	0.03589	0.15959	0.19799
2	0.36807	-1.8046	0.069483	0.0348	0.14807	0.1795
2	0.32161	-2.2734	0.088164	0.039431	0.17519	0.2112
2	0.34662	-2.031	0.07044	0.035453	0.15137	0.18371
2	0.43504	-1.7434	0.05778	0.03991	0.16919	0.19652
2	0.46669	-1.854	0.056806	0.041112	0.17746	0.20637
2	0.45035	-1.99	0.068376	0.040783	0.17716	0.20727
2	0.36195	-2.1828	0.06424	0.037426	0.1632	0.19734
2	0.42169	-1.8662	0.083482	0.041754	0.17945	0.20741
2	0.773	-0.88172	0.068866	0.045894	0.18765	0.20142
2	0.39007	-1.8193	0.087796	0.040363	0.17402	0.20325
2	0.37145	-2.0393	0.06395	0.038596	0.16757	0.19885
2	0.50922	-1.5183	0.078348	0.045033	0.19193	0.21494
2	0.45987	-1.7393	0.080152	0.038807	0.16667	0.19628
2	0.28932	-2.4162	0.058289	0.038559	0.17334	0.21155
2	0.18316	-2.8321	0.048939	0.028706	0.12981	0.17531
2	0.31618	-2.225	0.092196	0.039044	0.1712	0.20473
2	0.30075	-2.2196	0.066759	0.036502	0.15906	0.19381
2	0.44331	-1.6822	0.056692	0.039793	0.16773	0.1944
2	0.57662	-1.3305	0.094351	0.046451	0.19568	0.21567
2	0.39845	-1.798	0.099686	0.042642	0.18562	0.21434
2	0.30556	-2.291	0.051769	0.033825	0.14867	0.18639
2	0.44089	-1.7408	0.080365	0.038257	0.16505	0.19593
2	0.70788	-0.88065	0.064554	0.044901	0.18092	0.19411
2	0.26203	-2.1318	0.096586	0.028652	0.12195	0.16006
2	-0.16268	-4.469	0.051307	0.016915	0.087264	0.15202
2	0.15319	-2.9317	0.047309	0.020893	0.092846	0.14069
2	0.31378	-2.4348	0.054409	0.02787	0.11809	0.15569
2	0.4503	-2.2166	0.049008	0.026891	0.10605	0.13773
2	0.25975	-2.8163	0.050116	0.02458	0.10424	0.14574
2	0.58863	-1.6272	0.057255	0.033435	0.13152	0.15342
2	0.43706	-2.3425	0.07068	0.035744	0.15675	0.18806
2	0.36716	-2.4569	0.079025	0.03516	0.15877	0.19449
2	0.34617	-2.6122	0.051189	0.030263	0.12988	0.16594
2	0.22241	-2.7906	0.071141	0.042475	0.20331	0.24366
2	0.89098	-0.37397	0.058031	0.040451	0.15277	0.15789
2	0.18158	-3.0023	0.043366	0.024659	0.11189	0.1579
2	0.082278	-3.1929	0.052093	0.023107	0.11395	0.16689
2	0.98753	-0.15273	0.07766	0.046039	0.18316	0.18533
2	0.13805	-3.2873	0.070128	0.027462	0.12946	0.17734
2	0.1436	-3.1974	0.051512	0.026411	0.1214	0.16812
2	0.38315	-2.505	0.06661	0.032136	0.14134	0.1764
2	0.25065	-2.9733	0.054423	0.02721	0.12249	0.16493
2	0.30496	-2.6244	0.048825	0.028939	0.12538	0.16392
2	0.34953	-2.5559	0.049871	0.028579	0.12157	0.15805
2	0.58278	-1.6215	0.04927	0.03302	0.13009	0.1526
2	0.46972	-2.0366	0.064064	0.033877	0.14557	0.17555
2	0.36268	-2.5291	0.07212	0.033266	0.1474	0.18245
2	0.50561	-1.9596	0.04931	0.031899	0.12897	0.15587
2	0.19763	-3.1292	0.055143	0.027145	0.12626	0.17255
2	0.35532	-2.3373	0.060241	0.029768	0.129	0.16513
2	0.36336	-2.3117	0.050777	0.030206	0.1305	0.16613
2	0.25627	-2.8489	0.061981	0.02915	0.13348	0.17615
2	0.44142	-2.196	0.049372	0.029108	0.11821	0.14947
2	0.26848	-2.6509	0.055328	0.027168	0.1168	0.15614
2	0.39529	-2.3487	0.049037	0.030047	0.12636	0.15975
2	0.39799	-2.3446	0.056721	0.034258	0.15416	0.189
2	0.30223	-2.7369	0.049145	0.027109	0.11591	0.15487
2	0.79049	-0.89294	0.060006	0.03607	0.13586	0.1483
2	0.40918	-2.303	0.046438	0.028023	0.11447	0.14801
2	0.11219	-3.1885	0.052068	0.020805	0.095865	0.14662
2	0.38648	-2.2603	0.047792	0.028913	0.12047	0.15406
2	0.84974	-0.59891	0.047843	0.035336	0.12779	0.13689
2	0.43631	-2.1599	0.054799	0.030973	0.12808	0.159
2	0.42808	-2.2994	0.047617	0.029003	0.11869	0.15101
2	0.4559	-2.0376	0.061867	0.030631	0.12585	0.15581
2	0.39888	-2.3343	0.054958	0.029325	0.12216	0.15544
2	0.62772	-1.5141	0.053004	0.034255	0.13525	0.15609
2	0.49826	-1.5591	0.063263	0.032198	0.13516	0.1651
2	0.29686	-2.0507	0.073944	0.031867	0.14308	0.18079
2	0.53912	-1.4374	0.088261	0.039892	0.17047	0.19382
2	0.41599	-2.0222	0.073356	0.032764	0.14444	0.17964
2	0.33858	-1.9986	0.089843	0.03292	0.14584	0.18111
2	0.72059	-0.87801	0.087272	0.04326	0.17775	0.19165
2	0.39987	-2.098	0.088727	0.033507	0.14926	0.18533
2	0.31597	-2.1773	0.053614	0.026273	0.11647	0.15778
2	0.40778	-1.8094	0.058083	0.033417	0.14375	0.1751
2	0.38521	-2.2762	0.066398	0.03092	0.13693	0.17416
2	0.39638	-2.0173	0.07386	0.034901	0.15253	0.185
2	0.42985	-1.7543	0.073091	0.027309	0.11348	0.14796
2	0.49205	-1.8333	0.073173	0.035546	0.154	0.18432
2	0.49743	-1.5744	0.085046	0.036268	0.15398	0.18049
2	0.58846	-1.4842	0.063008	0.035762	0.14893	0.1738
2	0.52445	-1.6943	0.077481	0.035453	0.15235	0.1815
2	0.42666	-1.7306	0.085024	0.03503	0.15151	0.18175
2	0.47916	-1.86	0.068528	0.034568	0.14972	0.18123
2	0.47385	-1.6155	0.074819	0.03473	0.14772	0.17566
2	0.45993	-1.6188	0.083633	0.034829	0.14851	0.17697
2	0.38485	-2.2001	0.073239	0.034064	0.15287	0.18977
2	0.29071	-2.5538	0.064701	0.030892	0.14263	0.18498
2	0.39695	-1.8761	0.08247	0.03047	0.13349	0.16993
2	0.5873	-1.3326	0.078893	0.039364	0.16508	0.18652
2	0.44957	-1.9045	0.06872	0.033519	0.14605	0.17923
2	0.49679	-1.9308	0.066938	0.035248	0.15238	0.18263
2	0.39655	-1.929	0.081697	0.033102	0.14402	0.1766
2	0.77045	-0.88459	0.076844	0.042165	0.17173	0.18573
2	0.61868	-1.1782	0.065854	0.037891	0.15424	0.17357
2	0.49024	-1.5659	0.084318	0.037865	0.16274	0.18923
2	0.50954	-1.722	0.07598	0.034217	0.14741	0.1778
2	0.49714	-1.5049	0.064916	0.035196	0.14788	0.17394
2	0.42974	-2.0674	0.065515	0.033568	0.14725	0.18161
2	0.41812	-1.6543	0.07056	0.03058	0.12867	0.15999
2	0.40578	-2.0262	0.065148	0.031113	0.13518	0.17042
2	0.62876	-1.0874	0.068993	0.03774	0.15351	0.17264
2	0.57347	-1.4795	0.06673	0.037176	0.15696	0.18252
2	0.44718	-1.6444	0.065708	0.03468	0.14835	0.17718
2	0.55106	-1.2852	0.067642	0.035603	0.14721	0.17044
2	0.46274	-1.8303	0.067811	0.032765	0.14109	0.17332
2	0.50157	-1.7807	0.092212	0.038489	0.16904	0.19856
3	0.47647	-1.6708	0.050126	0.034347	0.13859	0.16529
3	0.38091	-1.9393	0.049996	0.028082	0.11226	0.14566
3	0.36508	-2.0272	0.059979	0.032934	0.13705	0.16949
3	0.33965	-2.1015	0.058727	0.031346	0.13161	0.16639
3	0.58306	-1.229	0.053009	0.036137	0.14276	0.16409
3	0.43461	-1.8365	0.044137	0.033538	0.13619	0.16497
3	0.32841	-2.1645	0.050614	0.031586	0.13338	0.16842
3	0.49136	-1.6182	0.057568	0.035355	0.14306	0.16932
3	0.43466	-1.7954	0.061693	0.033917	0.13888	0.16787
3	0.52389	-1.496	0.062487	0.033651	0.13386	0.15917
3	0.53333	-1.4753	0.04683	0.035245	0.14039	0.16435
3	0.48797	-1.6792	0.073089	0.033449	0.13534	0.16284
3	0.60567	-1.2604	0.05082	0.035861	0.14073	0.16138
3	0.4557	-1.9049	0.0735	0.033107	0.13553	0.16514
3	0.36028	-2.0695	0.045592	0.029052	0.11797	0.15173
3	0.38588	-1.9966	0.060504	0.030474	0.12506	0.15806
3	0.39993	-2.1477	0.064682	0.032842	0.13782	0.17024
3	0.3355	-2.0279	0.069574	0.029878	0.12494	0.16037
3	0.6427	-1.23	0.065748	0.035985	0.13956	0.1588
3	0.29993	-2.3373	0.055899	0.02633	0.10794	0.14526
3	0.6589	-1.1438	0.058742	0.035526	0.13643	0.15521
3	0.34021	-2.2308	0.066258	0.031212	0.13278	0.16838
3	0.47233	-1.733	0.093561	0.041987	0.18596	0.21404
3	0.44273	-1.75	0.056711	0.035838	0.15525	0.18606
3	0.36835	-1.978	0.060705	0.036777	0.16571	0.20111
3	0.48669	-1.6411	0.068178	0.039265	0.17189	0.20028
3	0.53064	-1.5061	0.064036	0.039167	0.1694	0.19579
3	0.71005	-0.93666	0.066754	0.043053	0.18147	0.19875
3	0.30537	-2.0755	0.052294	0.034861	0.1589	0.19757
3	0.22935	-2.433	0.056636	0.030448	0.14027	0.18371
3	0.31928	-2.0367	0.05389	0.036532	0.16403	0.19914
3	0.63907	-1.0744	0.068114	0.042861	0.1823	0.20172
3	0.28142	-2.1612	0.049719	0.034909	0.15945	0.1982
3	0.40634	-1.9863	0.060548	0.035698	0.15866	0.19329
3	0.30471	-2.2617	0.072061	0.034964	0.15975	0.19882
3	0.38799	-1.9749	0.070189	0.037214	0.16795	0.20264
3	0.23867	-2.3946	0.061187	0.033141	0.15321	0.1957
3	0.24825	-2.3995	0.069987	0.032942	0.15176	0.19364
3	0.36219	-1.9397	0.075639	0.035781	0.15993	0.195
3	0.37754	-1.9731	0.060374	0.036169	0.16188	0.1967
3	0.33775	-2.1601	0.072172	0.035423	0.15936	0.19613
3	0.29485	-2.3223	0.066571	0.034992	0.15965	0.19887
3	0.50907	-1.6054	0.055998	0.037907	0.16323	0.19065
3	0.25379	-2.3035	0.066201	0.032585	0.15019	0.19217
3	0.4181	-1.7043	0.06547	0.0377	0.16595	0.19691
3	0.34557	-2.073	0.05534	0.033524	0.14975	0.18698
3	0.43816	-1.7864	0.067124	0.038295	0.16967	0.20113
3	0.55111	-1.373	0.064738	0.043237	0.1894	0.21368
3	0.48665	-1.5734	0.061386	0.040235	0.17628	0.20377
3	0.57246	-1.3851	0.06613	0.043194	0.18773	0.21109
3	0.29554	-2.3114	0.060976	0.036822	0.16977	0.20891
3	0.51884	-1.4761	0.0506	0.039543	0.17015	0.19567
3	0.31355	-2.2412	0.062571	0.034563	0.15668	0.19537
3	0.95641	-0.057798	0.076366	0.049992	0.20234	0.20327
3	0.36669	-2.0441	0.055771	0.034983	0.15602	0.1916
3	0.3774	-2.0651	0.059996	0.037022	0.16469	0.19821
3	0.2374	-2.7531	0.09962	0.038661	0.18143	0.22206
3	0.21086	-2.6448	0.060921	0.030585	0.14496	0.19098
3	0.2298	-2.5261	0.059058	0.0336	0.15683	0.19979
3	0.2203	-2.45	0.074967	0.031581	0.14874	0.19354
3	0.098149	-2.7776	0.081629	0.029146	0.14132	0.19221
3	0.19521	-2.5431	0.059492	0.02944	0.13815	0.18447
3	0.079048	-2.887	0.080042	0.029681	0.14439	0.19608
3	0.25767	-2.4238	0.070295	0.031774	0.14679	0.18948
3	0.1896	-2.5586	0.064967	0.028865	0.13414	0.18006
3	0.45615	-1.6411	0.090061	0.039352	0.17442	0.2039
3	0.23893	-2.7443	0.059898	0.049065	0.23911	0.2823
3	0.2561	-2.3028	0.089347	0.034593	0.16157	0.20283
3	0.22361	-2.47	0.058593	0.028493	0.13375	0.17913
3	0.30177	-2.1031	0.071059	0.034826	0.15858	0.1965
3	0.33511	-2.1991	0.070347	0.034202	0.15506	0.19289
3	0.25131	-2.4139	0.077785	0.037279	0.17619	0.21843
3	0.23649	-2.4646	0.064683	0.032242	0.14997	0.19324
3	0.39879	-1.8814	0.062463	0.035834	0.15907	0.19273
3	0.1946	-2.5118	0.046397	0.029052	0.13363	0.17731
3	0.19227	-2.6553	0.057854	0.033302	0.15845	0.20436
3	0.1502	-2.6855	0.051285	0.030508	0.14453	0.19129
3	0.22078	-2.604	0.046248	0.030709	0.14231	0.18689
3	0.5579	-1.423	0.078516	0.04046	0.17444	0.19863
3	0.21688	-2.5198	0.051748	0.029154	0.13514	0.18035
3	0.20797	-2.615	0.058462	0.028916	0.1368	0.18333
3	0.13557	-2.7324	0.043919	0.027352	0.12983	0.17831
3	0.11112	-2.9538	0.058002	0.027392	0.1339	0.18557
3	0.16598	-2.7188	0.072282	0.029792	0.14064	0.18787
3	0.1876	-2.548	0.056653	0.030724	0.14575	0.1924
3	0.37483	-1.8555	0.04483	0.035835	0.15959	0.19343
3	0.6223	-1.2496	0.062785	0.041793	0.17769	0.19854
3	0.28602	-2.2896	0.074563	0.033399	0.15141	0.19049
3	0.18431	-2.6993	0.067896	0.031012	0.14618	0.19253
3	0.17636	-2.5275	0.066122	0.029095	0.13719	0.18401
3	0.097686	-2.8358	0.066727	0.028334	0.13647	0.1869
3	0.31758	-2.2977	0.064113	0.03438	0.15539	0.1937
3	0.13952	-2.8132	0.075805	0.033636	0.1619	0.20973
3	0.31421	-2.2396	0.061627	0.033644	0.15263	0.19119
3	0.18536	-2.7186	0.051714	0.032597	0.15467	0.20056
3	0.3496	-2.6825	0.04769	0.03669	0.16204	0.19485
3	0.64095	-1.1304	0.060834	0.04108	0.17015	0.18761
3	0.40188	-2.0275	0.059188	0.036021	0.1582	0.19062
3	0.5764	-1.4599	0.072667	0.045128	0.19744	0.21951
3	0.43975	-2.0267	0.063085	0.03855	0.17078	0.20183
3	0.41694	-1.9875	0.075272	0.040465	0.18126	0.21158
3	0.43534	-1.8146	0.088125	0.040861	0.18228	0.21134
3	0.43395	-1.8083	0.054879	0.034765	0.14932	0.17929
3	0.45083	-1.7923	0.069077	0.036755	0.15969	0.18912
3	0.41856	-1.8916	0.042326	0.034753	0.15013	0.18024
3	0.52527	-1.7019	0.054765	0.03828	0.16317	0.18845
3	0.39522	-2.0704	0.039414	0.033168	0.14411	0.17717
3	0.41499	-1.9649	0.046577	0.032912	0.14067	0.17192
3	0.34199	-2.4535	0.044932	0.032715	0.14521	0.1821
3	0.35881	-2.2497	0.087557	0.036593	0.16598	0.20122
3	0.25275	-2.4424	0.070819	0.03474	0.15905	0.1981
3	0.59615	-1.4365	0.06765	0.044534	0.19281	0.21371
3	0.37897	-2.2547	0.060031	0.035843	0.16107	0.19573
3	0.32507	-2.2373	0.055993	0.035659	0.15908	0.1935
3	0.32354	-2.2161	0.042468	0.029229	0.12794	0.16575
3	0.31802	-2.249	0.056946	0.031241	0.13943	0.1772
3	0.32983	-2.4577	0.045323	0.02999	0.13177	0.16937
3	0.36929	-2.1708	0.054684	0.032193	0.14178	0.17691
3	0.61408	-1.3317	0.049981	0.037036	0.15175	0.17247
3	0.315	-2.4526	0.078884	0.032031	0.13683	0.17275
3	0.56959	-1.3346	0.073049	0.037644	0.1522	0.17392
3	0.44252	-1.7434	0.067891	0.034895	0.14567	0.17451
3	0.60201	-1.2157	0.074443	0.039098	0.1585	0.17858
3	0.59674	-1.3097	0.053432	0.037764	0.15449	0.17745
3	0.72394	-0.96683	0.074109	0.041317	0.16677	0.18316
3	0.20789	-2.302	0.067258	0.026285	0.1152	0.15798
3	0.56091	-1.4073	0.06448	0.037804	0.15678	0.18135
3	0.53618	-1.3538	0.074091	0.040141	0.16911	0.19364
3	0.34184	-1.9574	0.066321	0.031514	0.13379	0.16824
3	0.44006	-1.8903	0.061625	0.034822	0.14573	0.17537
3	0.28021	-2.2089	0.042145	0.028666	0.12424	0.16339
3	0.37193	-2.0788	0.059741	0.034335	0.14748	0.18076
3	0.49036	-1.5421	0.056595	0.03575	0.14772	0.17412
3	0.39319	-1.88	0.080117	0.035567	0.153	0.18511
3	0.30643	-2.1672	0.064407	0.033336	0.14615	0.18347
3	0.52205	-1.4145	0.074695	0.038579	0.1606	0.18473
3	0.25308	-2.3285	0.056765	0.030966	0.13703	0.17754
3	0.41537	-1.8487	0.088766	0.0381	0.16457	0.19495
3	0.34677	-2.1863	0.072132	0.033815	0.14546	0.18022
3	0.37281	-2.0087	0.078494	0.033577	0.14234	0.1751
3	0.37611	-2.0565	0.045134	0.035655	0.15346	0.18609
3	0.35576	-1.8644	0.070273	0.032719	0.13998	0.17362
3	0.21753	-2.3739	0.069345	0.029421	0.13145	0.1733
3	0.30538	-2.0457	0.052685	0.030608	0.13198	0.16917
3	0.49619	-1.5711	0.072817	0.039074	0.16367	0.18861
3	0.36323	-2.0755	0.082894	0.035106	0.15174	0.18526
3	0.37612	-1.9221	0.069532	0.032694	0.13844	0.17125
3	0.83836	-0.41644	0.059961	0.043678	0.16952	0.17657
3	0.41532	-1.9039	0.057923	0.034453	0.14545	0.17663
3	0.51781	-1.4305	0.069699	0.037821	0.15647	0.18077
3	0.44934	-1.6416	0.053926	0.034608	0.14389	0.17227
3	0.41797	-1.8352	0.056131	0.033355	0.13927	0.17008
3	0.41058	-1.9649	0.064783	0.032887	0.13736	0.16869
3	0.36064	-2.0727	0.062817	0.031187	0.13124	0.16517
3	0.2239	-2.313	0.055258	0.024837	0.10668	0.14882
3	0.24518	-2.5053	0.071595	0.02938	0.12853	0.16899
3	0.38627	-1.8898	0.051268	0.033807	0.14327	0.17508
3	0.32186	-2.1599	0.066554	0.030869	0.13244	0.16852
3	0.26029	-2.3595	0.068176	0.028768	0.12366	0.16273
3	0.19707	-2.4995	0.084934	0.028067	0.12491	0.16796
3	0.3216	-1.9689	0.073172	0.033619	0.1461	0.18127
3	0.46436	-1.6296	0.067928	0.035216	0.14673	0.17498
3	0.37145	-1.7643	0.061802	0.034304	0.14651	0.17893
3	0.49285	-1.551	0.07312	0.035618	0.14766	0.17397
3	0.30355	-2.176	0.069182	0.031904	0.13878	0.17562
3	0.28854	-2.2777	0.05506	0.027245	0.11565	0.15419
3	0.33621	-2.0566	0.078817	0.032438	0.14003	0.17577
3	0.18196	-2.6205	0.06086	0.026128	0.11526	0.15934
3	0.30218	-2.1754	0.055914	0.029907	0.12876	0.1661
3	0.43479	-1.7089	0.064187	0.034004	0.1426	0.17228
3	0.36453	-1.9764	0.07139	0.034201	0.14831	0.18226
3	0.24326	-2.4477	0.053133	0.030923	0.13545	0.17477
3	0.21118	-2.5459	0.05376	0.025406	0.10999	0.15261
3	0.13976	-2.8069	0.039898	0.0236	0.10504	0.15163
3	0.28321	-2.4758	0.062999	0.031158	0.13582	0.17452
3	0.25538	-2.1369	0.04892	0.027935	0.1216	0.16139
3	0.29573	-2.2832	0.057233	0.031465	0.13628	0.17343
3	0.20567	-2.5925	0.067125	0.029009	0.12878	0.17114
3	0.27811	-2.2665	0.081202	0.03209	0.14082	0.17858
3	0.25468	-2.4018	0.049981	0.026233	0.11278	0.15332
3	0.2319	-2.4168	0.053713	0.027286	0.11935	0.16085
3	0.43091	-1.5956	0.043922	0.032564	0.13421	0.16377
3	0.35471	-2.0522	0.067327	0.032955	0.14194	0.17631
3	0.21557	-2.4758	0.060557	0.029459	0.13103	0.1725
3	0.58649	-1.1217	0.058266	0.037157	0.15107	0.17166
3	0.10202	-2.7878	0.037593	0.023254	0.10438	0.15221
3	0.31009	-2.1585	0.080424	0.034512	0.15143	0.18778
3	0.08492	-2.9337	0.05436	0.027537	0.1281	0.17708
3	0.045831	-2.9517	0.039136	0.025065	0.11584	0.1665
3	0.3081	-2.2116	0.057703	0.033616	0.14632	0.18255
3	0.1712	-2.561	0.061266	0.028849	0.1303	0.17478
3	-0.0041526	-3.03	0.055457	0.019246	0.090622	0.14536
3	-0.021681	-3.2594	0.051812	0.022104	0.10605	0.16078
3	0.057138	-2.8848	0.048673	0.027586	0.13092	0.1818
3	0.055086	-3.119	0.045632	0.022085	0.10331	0.1553
3	0.17288	-2.5754	0.066187	0.027598	0.12338	0.16731
3	0.18056	-2.5622	0.062149	0.028132	0.12645	0.17002
3	0.039945	-3.2111	0.038864	0.02058	0.09587	0.14877
3	0.48544	-1.9372	0.059721	0.031141	0.12907	0.15753
3	0.24888	-2.5658	0.062865	0.025895	0.11293	0.1536
3	0.53615	-1.5272	0.066181	0.034196	0.1433	0.16902
3	0.15848	-3.0578	0.054501	0.023982	0.10839	0.15382
3	0.18462	-2.8084	0.056651	0.027272	0.12142	0.16305
3	-0.056606	-3.7039	0.056674	0.019159	0.093666	0.15038
3	0.15855	-2.6572	0.052372	0.024013	0.10603	0.14974
3	0.11649	-2.8512	0.055125	0.023196	0.10922	0.15834
3	0.046937	-3.4767	0.057322	0.020503	0.096798	0.14973
3	0.35364	-2.0612	0.058823	0.027371	0.1155	0.15126
3	0.44219	-1.7282	0.052236	0.032836	0.1374	0.16466
3	0.051442	-3.1411	0.053957	0.025397	0.12166	0.17122
3	0.19524	-2.5928	0.076533	0.028821	0.13421	0.1781
3	0.27705	-2.4579	0.051537	0.030052	0.13297	0.17019
3	0.23998	-2.5845	0.068716	0.028025	0.1269	0.16856
3	0.16994	-3.031	0.051774	0.024608	0.11181	0.15688
3	0.14289	-2.6317	0.062217	0.028965	0.13349	0.17669
3	0.03345	-3.2691	0.065824	0.021909	0.10571	0.15887
3	0.11123	-2.8988	0.054803	0.026292	0.12003	0.1648
3	0.41718	-1.9843	0.059593	0.027352	0.11234	0.14519
3	0.093428	-3.282	0.033776	0.020129	0.091666	0.14128
3	0.070999	-2.9931	0.037244	0.024748	0.1164	0.16422
3	0.0099358	-3.3253	0.036828	0.016052	0.07548	0.13061
3	0.33955	-2.2797	0.058075	0.028432	0.12343	0.16013
3	0.22244	-2.7824	0.055089	0.025781	0.11565	0.15842
3	-0.011509	-3.2585	0.036992	0.021003	0.1025	0.15634
3	0.041056	-3.4339	0.043114	0.017743	0.084054	0.13717
3	0.17563	-2.65	0.063645	0.027371	0.12494	0.16746
3	0.11379	-3.2938	0.047329	0.019773	0.087307	0.13495
3	0.073755	-3.1977	0.035608	0.022288	0.10704	0.15796
3	0.54905	-1.5647	0.052304	0.035619	0.14996	0.17342
3	0.23463	-2.7363	0.054435	0.027231	0.1227	0.16432
3	0.075922	-3.504	0.038854	0.022454	0.10702	0.15798
3	0.062182	-3.3619	0.054002	0.020277	0.095283	0.1468
3	0.34816	-2.3553	0.048519	0.02417	0.099773	0.13689
3	0.088528	-2.8292	0.037668	0.02381	0.11033	0.15777
3	0.11562	-3.0081	0.045483	0.019725	0.088934	0.13804
3	0.13507	-2.9514	0.053969	0.022981	0.10563	0.15339
3	0.36867	-2.1558	0.053497	0.028127	0.11896	0.15379
3	0.35635	-2.053	0.070329	0.039362	0.17254	0.20657
3	0.31086	-2.3015	0.044444	0.036608	0.16093	0.19794
3	0.42276	-1.7516	0.052812	0.035946	0.15048	0.17985
3	0.58223	-1.4625	0.078636	0.045138	0.19054	0.21285
3	0.34942	-1.9769	0.063133	0.036623	0.15771	0.19003
3	0.53073	-1.3254	0.054758	0.041966	0.17414	0.19623
3	0.24041	-2.4547	0.058252	0.035111	0.15752	0.19808
3	0.26351	-2.2958	0.072939	0.035431	0.15615	0.1935
3	0.29112	-2.2667	0.05302	0.035926	0.16009	0.19843
3	0.40285	-1.9327	0.072399	0.042032	0.18132	0.21035
3	0.27786	-2.4074	0.067515	0.037686	0.16811	0.20643
3	0.39084	-2.2152	0.059576	0.030184	0.12492	0.15698
3	0.34462	-2.4512	0.066939	0.030818	0.13188	0.16666
3	0.60506	-1.3723	0.068322	0.035523	0.14326	0.16454
3	0.11074	-3.206	0.070008	0.028425	0.13751	0.1873
3	0.39559	-2.036	0.076558	0.036574	0.16239	0.19437
3	0.46141	-1.8588	0.059266	0.032111	0.13241	0.16099
3	0.67515	-1.1709	0.074957	0.039076	0.1599	0.1774
3	0.36278	-2.4941	0.066353	0.030778	0.13136	0.16617
3	0.4113	-2.14	0.048835	0.028626	0.11715	0.14951
3	0.45292	-1.9414	0.059905	0.032355	0.13247	0.16042
3	0.50008	-1.8788	0.060259	0.032049	0.13073	0.15821
3	0.21777	-2.9228	0.075626	0.033939	0.15881	0.20174
3	0.64121	-1.1759	0.051003	0.034795	0.13509	0.15317
3	0.2083	-2.9182	0.05337	0.026852	0.11741	0.15994
3	0.25644	-2.5274	0.06926	0.031269	0.14117	0.18109
3	0.15221	-3.0349	0.051298	0.030665	0.14906	0.19707
3	0.51978	-1.6779	0.054931	0.039914	0.17533	0.20157
3	0.54089	-1.8172	0.065135	0.033511	0.13712	0.16264
3	0.29365	-2.578	0.074066	0.026325	0.11199	0.15154
3	-0.02119	-3.7179	0.056393	0.027641	0.13854	0.19342
3	0.28367	-2.6291	0.058958	0.024769	0.10446	0.14493
3	0.51614	-1.7686	0.063897	0.034595	0.14569	0.17266
3	0.39758	-2.2048	0.044249	0.029007	0.11973	0.15253
3	0.24646	-2.8187	0.068842	0.025426	0.11076	0.15328
3	0.57093	-1.5283	0.061988	0.035137	0.14446	0.16953
3	0.30992	-2.5549	0.068455	0.029178	0.1302	0.17134
3	0.5377	-1.4981	0.082586	0.039651	0.16895	0.19284
3	0.26251	-2.5314	0.064494	0.029923	0.13667	0.18001
3	0.40142	-2.0791	0.064191	0.031253	0.1346	0.17001
3	0.44552	-1.8481	0.075931	0.037096	0.15992	0.18863
3	0.44772	-1.9256	0.089827	0.037135	0.16313	0.19482
3	0.62293	-1.284	0.067829	0.035231	0.14001	0.16101
3	0.39573	-1.945	0.065051	0.032712	0.1397	0.1723
3	0.70421	-0.91915	0.066955	0.040541	0.1634	0.17851
3	0.68544	-1.0349	0.073359	0.036676	0.14406	0.16114
3	0.42831	-1.836	0.081379	0.035838	0.15609	0.18716
3	0.52035	-1.5963	0.052535	0.032174	0.13138	0.15951
3	0.43754	-1.9089	0.079709	0.038011	0.1655	0.19481
3	0.38437	-2.1735	0.059346	0.032417	0.14159	0.17727
3	0.60315	-1.2009	0.074157	0.041315	0.17273	0.19242
3	0.57669	-1.2527	0.072231	0.039445	0.16461	0.1861
3	0.52627	-1.6993	0.081363	0.037356	0.15979	0.18773
3	0.41613	-2.0928	0.076335	0.032663	0.14263	0.17746
3	0.36582	-2.1458	0.056946	0.032879	0.14559	0.18266
3	0.39703	-2.0328	0.058972	0.030831	0.13064	0.16342
3	0.69587	-1.008	0.070837	0.041392	0.16794	0.18337
3	0.37546	-2.098	0.065949	0.030068	0.13039	0.16728
3	0.44026	-2.0632	0.060394	0.040348	0.1796	0.21114
3	0.42562	-1.7983	0.11151	0.039744	0.17531	0.20446
3	0.4819	-1.8124	0.06708	0.032443	0.13683	0.16773
3	0.70852	-0.97814	0.062958	0.036337	0.14087	0.15691
3	0.58554	-1.4659	0.081494	0.040274	0.17139	0.19484
3	0.5446	-1.4995	0.069728	0.035581	0.14632	0.17038
3	0.48149	-1.8323	0.069689	0.035722	0.1546	0.18509
3	0.20583	-2.6125	0.039964	0.020132	0.085465	0.13155
3	0.29031	-2.3572	0.062138	0.030175	0.13389	0.17256
3	0.34447	-2.3683	0.094607	0.036192	0.16222	0.19732
3	-0.10063	-3.7856	0.046874	0.015897	0.08523	0.1502
3	0.5756	-1.3883	0.082543	0.036214	0.14842	0.17109
3	0.30942	-2.2309	0.079472	0.033328	0.14905	0.18601
3	0.18966	-2.1743	0.057695	0.055756	0.26865	0.30691
3	0.30179	-2.2729	0.075355	0.030244	0.1338	0.17207
3	0.2977	-2.334	0.076809	0.031566	0.1429	0.18324
3	0.41155	-2.1128	0.097587	0.037802	0.16649	0.1975
3	0.33093	-2.3762	0.073491	0.03098	0.13907	0.17839
3	0.40342	-1.8471	0.070913	0.035788	0.15639	0.18802
3	0.18095	-2.745	0.055871	0.027705	0.12876	0.17562
3	0.39232	-1.9506	0.076811	0.034345	0.14921	0.18133
3	0.36672	-2.1162	0.07044	0.03256	0.14461	0.18121
3	0.57595	-1.4581	0.061989	0.036147	0.14799	0.17066
3	0.30962	-2.4001	0.074523	0.029942	0.13556	0.17659
3	0.37699	-2.0886	0.081388	0.034235	0.15283	0.18913
3	0.40286	-2.0031	0.069314	0.030348	0.12784	0.16042
3	0.46196	-1.9931	0.093491	0.03866	0.17152	0.20308
3	0.58062	-1.3632	0.068257	0.038412	0.16095	0.1836
3	0.27628	-2.6357	0.074868	0.033752	0.15622	0.19835
