# Supplementary material for: How human runners regulate footsteps on uneven terrain
Source: eLife journal article supplement (doi:10.7554/elife.67177), 2023-02-22
Supplement: supp [file elife-67177-supp-v1.zip › elife_poa_e67177_Figure_7_figure_supplement_2.pdf]

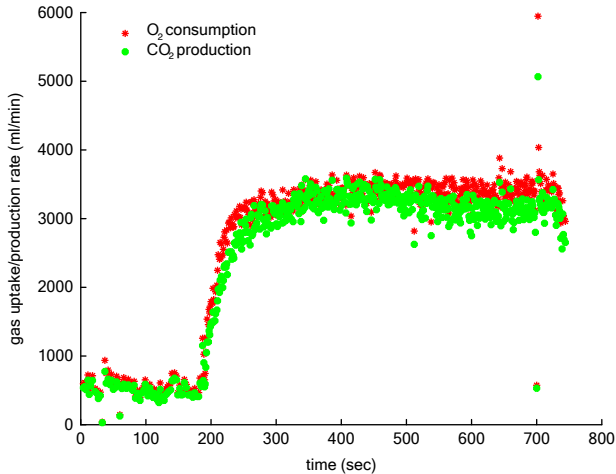

**Figure 7—figure supplement 2. Representative respirometry data.** Breath-by-breath respirometry data for a representative subject running on uneven II. Red stars represent O<sub>2</sub> consumption rate and green octagons represent CO<sub>2</sub> production rate.
