# Supplementary material for: How human runners regulate footsteps on uneven terrain
Source: eLife journal article supplement (doi:10.7554/elife.67177), 2023-02-22
Supplement: supp [file elife-67177-supp-v1.zip › elife_poa_e67177_Figure_7_source_data_1.csv]

subject	terrain_type	step_width_units_mm
1	1	3.0351
1	1	1.1082
1	1	3.4309
1	1	0.83273
1	1	0.33208
1	1	2.7817
1	1	4.218
1	1	0.81204
1	1	2.5986
1	1	0.32898
1	1	11.167
1	1	0.56604
1	1	8.938
1	1	2.2103
1	1	3.3643
1	1	6.8839
1	1	0.54937
1	1	7.9516
1	1	7.392
1	1	0.14504
1	1	3.9919
1	1	0.50446
1	1	3.2214
1	1	0.47215
1	1	4.4926
1	1	0.48888
1	1	14.376
1	1	4.7378
1	1	5.227
1	1	5.8685
1	1	3.3513
1	1	2.5354
1	1	3.9824
1	1	2.1857
1	1	3.4668
1	1	4.6625
1	1	6.3689
1	1	4.4468
1	1	0.040775
1	1	0.41087
1	1	4.6702
1	1	7.0346
1	1	3.05
1	1	12.162
1	1	5.0297
1	1	1.5253
1	1	0.40332
1	1	3.3908
1	1	0.9354
1	1	3.3636
1	1	3.5273
1	1	2.4617
1	1	2.5121
1	1	2.4267
1	1	2.4994
1	1	1.8313
1	1	4.3018
1	1	1.4443
1	1	0.87247
1	1	3.4804
1	1	2.1405
1	1	1.3331
1	1	0.55728
1	1	5.564
1	1	2.5117
1	1	5.2578
1	1	1.2966
1	1	1.2302
1	1	2.075
1	1	3.2302
1	1	0.96977
1	1	2.5216
1	1	5.7191
1	1	6.8604
1	1	0.088267
1	1	4.0611
1	1	3.6004
1	1	4.7945
1	1	2.4389
1	1	6.5832
1	1	1.104
1	1	0.48144
1	1	0.50132
1	1	2.4953
1	1	1.264
1	1	2.1747
1	1	4.775
1	1	2.2172
1	1	4.6694
1	1	0.87116
1	1	2.1778
1	1	5.3525
1	1	0.79165
1	1	4.5859
1	1	1.7965
1	1	4.0955
1	1	0.56205
1	1	0.78051
1	1	7.0906
1	1	4.6425
1	1	2.8767
1	1	2.213
1	1	4.3541
1	1	5.4247
1	1	3.5529
1	1	0.2522
1	1	3.4553
1	1	1.8715
1	1	3.2023
1	1	2.9659
1	1	5.6584
1	1	2.7581
1	1	3.796
1	1	2.806
1	1	2.0494
1	1	1.9908
1	1	3.5616
1	1	4.2078
1	1	0.77324
1	1	8.8972
1	1	4.7107
1	1	3.2812
1	1	2.8457
1	1	0.52741
1	1	2.4552
1	1	8.9122
1	1	2.8349
1	1	4.1545
1	1	2.7542
1	1	2.7724
1	1	1.3623
1	1	4.6902
1	1	5.1489
1	1	0.92959
1	1	4.8719
1	1	0.64286
1	1	2.7134
1	1	0.69552
1	1	2.8715
1	1	2.4876
1	1	0.2218
1	1	2.0783
1	1	0.93175
1	1	4.3089
1	1	0.016636
1	1	4.3488
1	1	1.2507
1	1	4.3658
1	1	3.6266
1	1	4.9258
1	1	2.8454
1	1	3.8177
1	1	0.78317
1	1	6.2307
1	1	1.4851
1	1	1.1733
1	1	6.9699
1	1	2.6357
1	1	4.0439
1	1	3.7
1	1	0.75459
1	1	3.9014
1	1	1.686
1	1	5.2812
1	1	5.6548
1	1	2.097
1	1	2.6521
1	1	5.9976
1	1	1.0548
1	1	3.2674
1	1	8.7451
1	1	3.8476
1	1	5.2905
1	1	4.0222
1	1	4.0105
1	1	5.4778
1	1	3.4008
1	1	3.5661
1	1	3.8752
1	1	9.9107
1	1	5.7107
1	1	2.518
1	1	0.16168
1	1	4.8067
1	1	7.0371
1	1	1.623
1	1	3.1746
1	1	2.7361
1	1	4.1161
1	1	0.88713
1	1	3.5602
1	1	3.9695
1	1	2.5741
1	1	0.66031
1	1	1.2598
1	1	4.0554
1	1	0.94413
1	1	3.6045
1	1	0.73379
1	1	2.0464
1	1	0.72164
1	1	3.5809
1	1	6.8756
1	1	1.8187
1	1	1.6993
1	1	4.486
1	1	4.2727
1	1	2.2696
1	1	4.3696
1	1	2.923
1	1	4.496
1	1	4.5507
1	1	1.1129
1	1	1.0812
1	1	5.6758
1	1	2.9917
1	1	3.7702
1	1	0.70534
1	1	0.34212
1	1	4.3217
1	1	4.7135
1	2	3.683
1	2	3.6803
1	2	0.18624
1	2	1.5329
1	2	0.14661
1	2	0.10198
1	2	5.3215
1	2	0.71935
1	2	1.1588
1	2	3.0222
1	2	5.6171
1	2	4.2418
1	2	3.7137
1	2	1.4105
1	2	0.070744
1	2	5.8211
1	2	1.1794
1	2	2.7774
1	2	7.5948
1	2	5.5325
1	2	4.9296
1	2	0.68246
1	2	3.2082
1	2	0.49439
1	2	2.5607
1	2	0.65972
1	2	2.132
1	2	3.8128
1	2	6.3979
1	2	7.0057
1	2	1.2645
1	2	3.6502
1	2	3.0928
1	2	2.5203
1	2	3.1407
1	2	9.0643
1	2	6.8728
1	2	1.6683
1	2	1.9613
1	2	1.1845
1	2	0.97305
1	2	2.2365
1	2	3.9887
1	2	7.6042
1	2	1.1403
1	2	3.5046
1	2	4.7104
1	2	6.4262
1	2	0.49745
1	2	5.9838
1	2	5.426
1	2	4.2867
1	2	2.8082
1	2	3.0936
1	2	4.7432
1	2	2.9712
1	2	7.8001
1	2	1.3002
1	2	0.089597
1	2	4.5013
1	2	2.7868
1	2	9.8151
1	2	1.27
1	2	2.7962
1	2	0.20459
1	2	0.83588
1	2	5.7535
1	2	10.503
1	2	10.768
1	2	0.076353
1	2	1.7675
1	2	0.44703
1	2	4.4068
1	2	0.87893
1	2	4.5758
1	2	0.89036
1	2	2.5291
1	2	1.4798
1	2	1.504
1	2	1.5403
1	2	0.69786
1	2	0.5019
1	2	0.67455
1	2	2.1013
1	2	2.4009
1	2	1.2214
1	2	5.3785
1	2	0.056185
1	2	0.32193
1	2	0.27468
1	2	5.4909
1	2	2.6408
1	2	0.37239
1	2	1.4758
1	2	0.32817
1	2	4.7335
1	2	10.952
1	2	0.56607
1	2	3.5891
1	2	0.83031
1	2	9.9522
1	2	1.0792
1	2	9.8316
1	2	2.0064
1	2	0.31658
1	2	8.6379
1	2	4.0357
1	2	3.653
1	2	1.7564
1	2	2.2064
1	2	3.2819
1	2	2.3295
1	2	7.0666
1	2	0.44805
1	2	0.49304
1	2	4.5058
1	2	6.1345
1	2	0.11492
1	2	6.3957
1	2	4.4942
1	2	19.623
1	2	0.84065
1	2	3.8067
1	2	2.7923
1	2	0.079532
1	2	2.2363
1	2	4.2713
1	2	1.076
1	2	6.0074
1	2	1.6076
1	2	0.37697
1	2	7.6816
1	2	0.20752
1	2	0.85741
1	2	2.3807
1	2	4.6345
1	2	2.8707
1	2	5.6991
1	2	9.591
1	2	6.9872
1	2	1.126
1	2	1.5241
1	2	1.6528
1	2	4.2787
1	2	1.1611
1	2	0.69923
1	2	4.0768
1	2	2.0739
1	2	5.8164
1	2	0.67383
1	2	0.4045
1	2	1.0299
1	2	0.052576
1	2	0.94373
1	2	4.7035
1	2	1.6099
1	2	0.82025
1	2	6.0378
1	2	4.737
1	2	0.97927
1	2	6.0761
1	2	0.84087
1	2	1.7294
1	2	6.5805
1	2	2.2044
1	2	2.1747
1	2	0.78702
1	2	2.6373
1	2	3.2866
1	2	3.0756
1	2	0.50989
1	2	2.2699
1	2	4.2519
1	2	4.6839
1	2	0.77699
1	2	3.7292
1	2	1.4926
1	2	3.7001
1	2	0.45104
1	2	6.0958
1	2	2.3075
1	2	2.2248
1	2	3.6773
1	2	2.2357
1	2	4.5004
1	2	2.3621
1	2	0.39301
1	2	0.2112
1	2	8.2259
1	2	0.2569
1	2	3.0107
1	2	4.6473
1	2	4.5457
1	2	1.9707
1	2	2.2803
1	2	5.1677
1	2	4.3521
1	2	2.1017
1	2	0.93212
1	2	4.2586
1	2	3.5189
1	2	3.6179
1	2	3.8066
1	2	8.165
1	2	1.3941
1	2	1.4291
1	2	1.869
1	2	4.7674
1	2	4.4978
1	2	0.13984
1	2	2.6727
1	2	4.9082
1	2	0.71846
1	2	1.8566
1	2	1.8772
1	2	4.8836
1	2	0.37388
1	2	4.2808
1	2	1.7799
1	2	3.0102
1	2	0.99859
1	2	8.6316
1	2	4.2028
1	2	4.8664
1	2	0.040677
1	2	0.39945
1	2	3.839
1	2	0.27974
1	2	0.040677
1	2	0.39945
1	2	3.839
1	2	0.27974
1	2	1.9892
1	2	3.8821
1	2	4.48
1	2	2.7301
1	2	6.1846
1	2	0.85031
1	2	3.1349
1	2	3.0748
1	2	3.8298
1	2	1.8116
1	2	2.9371
1	2	5.0633
1	2	2.4908
1	2	0.22806
1	2	2.1136
1	2	3.7843
1	2	0.83084
1	2	1.6735
1	2	5.8103
1	2	7.6863
1	2	3.2596
1	2	3.4882
1	2	2.8787
1	2	33.293
1	2	3.6919
1	2	1.8042
1	2	1.6853
1	2	8.3988
1	2	6.7391
1	2	0.13856
1	2	2.8363
1	3	0.2597
1	3	0.21825
1	3	3.8636
1	3	6.0834
1	3	0.71857
1	3	3.4358
1	3	4.3464
1	3	0.69636
1	3	1.9378
1	3	0.62123
1	3	3.8045
1	3	2.245
1	3	4.4112
1	3	8.8292
1	3	0.42612
1	3	0.015892
1	3	1.3039
1	3	3.1834
1	3	3.4077
1	3	6.7066
1	3	2.8491
1	3	3.674
1	3	23.784
1	3	1.5064
1	3	2.7923
1	3	1.9026
1	3	1.3379
1	3	0.66079
1	3	2.2094
1	3	5.2636
1	3	1.1237
1	3	3.6419
1	3	1.7007
1	3	2.9091
1	3	4.0171
1	3	3.8867
1	3	0.49897
1	3	1.7258
1	3	0.031523
1	3	5.8025
1	3	0.4349
1	3	0.2421
1	3	2.0657
1	3	1.8722
1	3	1.1315
1	3	1.1657
1	3	2.2285
1	3	2.3633
1	3	1.1936
1	3	5.1068
1	3	1.685
1	3	2.8674
1	3	1.9752
1	3	0.32558
1	3	2.5624
1	3	2.3413
1	3	1.9724
1	3	2.7746
1	3	2.3296
1	3	0.23499
1	3	0.79943
1	3	2.4004
1	3	4.0666
1	3	5.3164
1	3	0.87743
1	3	2.1611
1	3	1.2975
1	3	0.42467
1	3	5.6988
1	3	4.4995
1	3	3.7812
1	3	3.9248
1	3	0.82442
1	3	4.2542
1	3	0.31784
1	3	0.79634
1	3	2.5199
1	3	0.050068
1	3	3.481
1	3	6.1547
1	3	2.7011
1	3	2.0263
1	3	5.5144
1	3	7.5282
1	3	1.0555
1	3	1.6845
1	3	0.48385
1	3	1.9654
1	3	4.8406
1	3	1.3827
1	3	5.6208
1	3	2.8835
1	3	7.0469
1	3	1.4551
1	3	1.0309
1	3	8.2959
1	3	8.696
1	3	2.4816
1	3	5.4715
1	3	4.1301
1	3	1.2078
1	3	0.054192
1	3	1.5777
1	3	2.49
1	3	8.1288
1	3	7.5373
1	3	1.5742
1	3	0.59641
1	3	3.5887
1	3	3.4876
1	3	4.0661
1	3	4.8301
1	3	0.62079
1	3	3.6489
1	3	5.6651
1	3	4.5796
1	3	7.2446
1	3	1.9596
1	3	4.0478
1	3	1.0743
1	3	1.152
1	3	6.0411
1	3	3.5532
1	3	4.2519
1	3	0.77254
1	3	5.0312
1	3	2.4282
1	3	3.1292
1	3	10.531
1	3	0.47105
1	3	1.7
1	3	1.8069
1	3	3.9507
1	3	1.8003
1	3	3.3952
1	3	3.7678
1	3	8.1775
1	3	2.3496
1	3	0.68579
1	3	0.50852
1	3	5.2464
1	3	2.6025
1	3	3.015
1	3	1.147
1	3	5.3467
1	3	0.74418
1	3	6.3446
1	3	0.38608
1	3	4.9123
1	3	2.2649
1	3	2.9684
1	3	6.3384
1	3	0.38576
1	3	7.0861
1	3	1.3397
1	3	2.3442
1	3	5.3743
1	3	5.1786
1	3	1.9171
1	3	2.7017
1	3	2.4982
1	3	1.6115
1	3	2.2823
1	3	5.1069
1	3	3.9103
1	3	3.0189
1	3	4.1237
1	3	1.4398
1	3	2.2821
1	3	4.4897
1	3	2.8622
1	3	4.3364
1	3	5.4231
1	3	4.4861
1	3	3.9331
1	3	2.486
1	3	5.0272
1	3	3.5947
1	3	4.278
1	3	0.14708
1	3	0.80989
1	3	5.2183
1	3	0.93598
1	3	4.9399
1	3	0.53038
1	3	0.76408
1	3	3.2869
1	3	2.6118
1	3	6.0816
1	3	9.6173
1	3	0.67293
1	3	5.524
1	3	6.1143
1	3	0.010859
1	3	1.4499
1	3	3.8912
1	3	0.10513
1	3	6.6602
1	3	2.9466
1	3	2.898
1	3	3.0623
1	3	5.3059
1	3	5.5378
1	3	1.7913
1	3	6.4407
1	3	4.479
1	3	3.3038
1	3	1.4507
1	3	1.1113
1	3	1.1332
1	3	3.5742
1	3	0.27077
1	3	8.1673
1	3	1.9633
1	3	0.40793
1	3	0.84081
1	3	2.7864
1	3	5.2299
1	3	6.4978
1	3	0.7623
1	3	4.1069
1	3	1.154
1	3	3.6895
1	3	8.3219
1	3	5.1664
1	3	8.2503
1	3	1.4907
1	3	0.92868
1	3	10.32
1	3	4.7395
1	3	8.6431
1	3	0.86676
1	3	4.9429
1	3	0.44287
1	3	1.3742
1	3	0.14128
1	3	0.77417
1	3	4.6258
1	3	3.0331
1	3	3.9319
1	3	3.8641
1	3	3.9226
1	3	8.0292
1	3	5.8861
1	3	6.1856
1	3	3.2281
1	3	8.176
1	3	3.6004
1	3	0.36201
1	3	3.3434
1	3	3.5392
1	3	2.0585
1	3	7.0373
1	3	1.324
1	3	6.4367
1	3	2.9748
1	3	4.6466
1	3	5.7233
1	3	2.3516
1	3	1.7978
1	3	3.3269
1	3	3.9286
1	3	8.1238
1	3	7.211
1	3	3.3301
1	3	2.4287
1	3	1.355
1	3	3.5083
1	3	2.0126
1	3	4.6064
1	3	0.0079654
1	3	2.7258
1	3	5.3901
1	3	2.3701
1	3	3.9793
1	3	7.1153
1	3	0.40922
1	3	4.1976
1	3	0.30157
1	3	3.6062
1	3	4.1556
1	3	2.7927
1	3	0.61864
1	3	2.3016
1	3	0.87088
1	3	1.7549
1	3	0.91095
1	3	2.9105
1	3	4.5508
1	3	1.3877
1	3	2.6794
1	3	1.2622
2	1	14.882
2	1	8.4723
2	1	4.9791
2	1	7.8764
2	1	11.939
2	1	12.994
2	1	12.513
2	1	5.1732
2	1	2.9309
2	1	7.2493
2	1	11.859
2	1	9.9859
2	1	11.661
2	1	3.1624
2	1	0.46317
2	1	8.8467
2	1	13.107
2	1	3.2736
2	1	6.0946
2	1	11.482
2	1	10.895
2	1	3.506
2	1	9.2976
2	1	1.9421
2	1	6.7547
2	1	11.099
2	1	3.6829
2	1	12.911
2	1	11.732
2	1	4.5252
2	1	7.5705
2	1	9.2932
2	1	3.3699
2	1	12.16
2	1	3.5695
2	1	14.485
2	1	0.60757
2	1	9.1421
2	1	10.298
2	1	7.3386
2	1	9.3351
2	1	2.3216
2	1	3.0136
2	1	9.4529
2	1	7.375
2	1	4.4407
2	1	3.0952
2	1	11.227
2	1	1.9739
2	1	7.7872
2	1	10.282
2	1	0.075686
2	1	9.7858
2	1	8.7423
2	1	1.1467
2	1	15.862
2	1	5.7195
2	1	2.0059
2	1	3.2768
2	1	2.1387
2	1	10.248
2	1	13.723
2	1	7.971
2	1	3.5558
2	1	3.9824
2	1	6.0173
2	1	13.243
2	1	1.184
2	1	9.3445
2	1	2.8765
2	1	3.2955
2	1	0.67392
2	1	0.014548
2	1	7.0957
2	1	2.725
2	1	9.4231
2	1	5.9681
2	1	7.1851
2	1	10.9
2	1	11.166
2	1	3.6886
2	1	8.1493
2	1	9.9961
2	1	4.7823
2	1	8.9167
2	1	8.5496
2	1	12.259
2	1	0.5274
2	1	9.7763
2	1	12.598
2	1	5.0274
2	1	2.2408
2	1	1.1377
2	1	5.402
2	1	25.519
2	1	0.27311
2	1	27.434
2	1	8.4403
2	1	2.375
2	1	5.8193
2	1	2.0226
2	1	8.8887
2	1	11.071
2	1	7.7677
2	1	13.152
2	1	3.3542
2	1	11.17
2	1	4.7006
2	1	3.2853
2	1	5.6422
2	1	3.127
2	1	8.046
2	1	5.4091
2	1	9.3929
2	1	5.0553
2	1	8.0439
2	1	1.4175
2	1	12.459
2	1	8.145
2	1	12.057
2	1	6.094
2	1	3.5825
2	1	6.1764
2	1	2.0213
2	1	15.826
2	1	13.232
2	1	0.026772
2	1	9.6211
2	1	8.1059
2	1	1.8082
2	1	1.5442
2	1	3.9515
2	1	10.564
2	1	5.7765
2	1	12.264
2	1	0.0023856
2	1	1.7687
2	1	7.4502
2	1	15.73
2	1	8.5436
2	1	1.2797
2	1	6.5971
2	1	11.499
2	1	12.481
2	2	8.9191
2	2	6.2736
2	2	5.9527
2	2	11.761
2	2	8.6708
2	2	7.2963
2	2	11.963
2	2	9.5402
2	2	10.929
2	2	16.32
2	2	15.931
2	2	6.2591
2	2	4.6107
2	2	3.8257
2	2	6.1048
2	2	4.1513
2	2	8.7292
2	2	6.1049
2	2	5.8406
2	2	7.2579
2	2	11.791
2	2	5.2576
2	2	13.781
2	2	7.022
2	2	13.768
2	2	5.5333
2	2	4.9163
2	2	8.4781
2	2	4.9828
2	2	9.6978
2	2	4.4561
2	2	4.9182
2	2	5.5128
2	2	2.6014
2	2	1.1843
2	2	6.2392
2	2	14.049
2	2	4.1717
2	2	10.169
2	2	9.0254
2	2	5.1525
2	2	16.115
2	2	7.2734
2	2	5.6053
2	2	4.7774
2	2	6.1287
2	2	7.8311
2	2	8.1824
2	3	6.3593
2	3	4.0845
2	3	5.6125
2	3	13.673
2	3	8.4542
2	3	10.54
2	3	9.9827
2	3	2.1564
2	3	11.535
2	3	6.1398
2	3	8.8722
2	3	4.609
2	3	6.2181
2	3	8.7925
2	3	2.8142
2	3	5.2656
2	3	12.73
2	3	8.3363
2	3	5.0903
2	3	3.4464
2	3	14.894
2	3	7.1896
2	3	3.0868
2	3	8.9193
2	3	5.6493
2	3	8.5695
2	3	12.73
2	3	2.2679
2	3	2.092
2	3	5.2487
2	3	7.7643
2	3	8.2085
2	3	3.7403
2	3	4.7106
2	3	5.5648
2	3	6.8169
2	3	10.082
2	3	10.882
2	3	11.006
2	3	4.6909
2	3	0.44262
2	3	13.231
2	3	3.2814
2	3	9.3337
2	3	1.5446
2	3	16.662
2	3	10.586
2	3	8.2486
2	3	14.255
2	3	9.7479
2	3	5.894
2	3	8.1044
2	3	6.3689
2	3	4.7548
2	3	0.10966
2	3	11.256
2	3	7.2449
2	3	0.75117
2	3	12.859
2	3	12.843
2	3	4.1428
2	3	2.471
2	3	15.744
2	3	16.802
2	3	10.655
2	3	13.368
2	3	8.3738
2	3	3.7753
2	3	15.493
2	3	20.943
2	3	7.7617
2	3	11.335
2	3	2.0028
2	3	12.544
2	3	9.4208
2	3	9.3588
2	3	9.8081
2	3	3.4928
2	3	11.354
2	3	15.962
2	3	8.8684
2	3	10.703
2	3	4.3823
2	3	13.554
2	3	12.435
2	3	4.4799
2	3	3.6871
2	3	8.4346
2	3	6.2313
2	3	8.6058
2	3	12.206
2	3	9.8409
2	3	9.7385
2	3	8.8193
2	3	8.6429
2	3	8.4326
2	3	5.8814
2	3	9.6988
2	3	11.78
2	3	8.3495
2	3	23.357
2	3	11.143
2	3	8.0029
2	3	3.1493
2	3	13.549
2	3	12.293
2	3	5.8324
2	3	20.318
2	3	14.924
2	3	11.882
2	3	2.7887
2	3	12.16
2	3	5.9754
2	3	11.045
2	3	3.5161
2	3	6.7171
2	3	9.6264
2	3	5.3136
2	3	5.584
2	3	11.501
2	3	7.1855
2	3	5.5947
2	3	3.7548
2	3	2.5722
2	3	12.171
2	3	0.13063
2	3	10.409
2	3	4.9485
2	3	8.0688
2	3	19.615
2	3	4.9526
2	3	9.9211
2	3	4.7718
2	3	4.9443
2	3	16.029
2	3	6.1141
2	3	7.2342
2	3	11.328
2	3	8.9699
2	3	2.6984
2	3	7.3682
2	3	4.9186
2	3	3.9372
2	3	13.357
2	3	17.204
2	3	8.944
2	3	4.9145
2	3	12.384
2	3	7.6033
2	3	9.9108
2	3	2.9253
2	3	10.011
2	3	12.28
2	3	3.1086
2	3	9.2639
2	3	10.824
2	3	7.9957
2	3	1.758
2	3	13.341
2	3	12.399
2	3	8.5647
2	3	4.5153
2	3	3.9894
2	3	7.0648
2	3	7.1085
2	3	12.076
2	3	13.669
2	3	0.57692
2	3	10.24
2	3	15.555
2	3	9.3506
2	3	7.3051
2	3	6.9668
2	3	7.1909
2	3	2.9882
2	3	6.073
2	3	16.261
2	3	10.575
2	3	13.064
2	3	2.4144
2	3	15.23
2	3	4.5585
2	3	6.1521
2	3	11.465
2	3	8.4661
2	3	1.5179
2	3	3.3617
2	3	10.669
2	3	11.346
2	3	13.654
2	3	10
2	3	4.4874
2	3	12.941
2	3	7.5005
2	3	5.5045
2	3	13.505
2	3	11.453
2	3	8.436
2	3	10.836
2	3	15.332
2	3	8.9433
2	3	9.7187
2	3	2.7112
2	3	13.57
2	3	8.3259
2	3	12.031
2	3	5.8685
2	3	5.4886
2	3	15.041
2	3	4.7716
2	3	8.7796
2	3	4.2549
2	3	11.211
2	3	6.0448
2	3	10.954
2	3	7.2552
2	3	8.4616
2	3	4.1142
2	3	0.74271
2	3	8.2155
2	3	7.5778
2	3	4.0738
2	3	12.296
2	3	3.86
2	3	5.7116
2	3	9.9737
2	3	19.425
2	3	8.3909
2	3	1.4578
2	3	9.7113
2	3	12.709
2	3	8.188
2	3	14.442
2	3	13.451
2	3	1.1529
2	3	7.0749
2	3	5.3316
2	3	3.1486
2	3	4.648
2	3	2.2732
2	3	0.81496
2	3	6.3413
2	3	11.743
2	3	6.262
2	3	10.272
2	3	12.498
2	3	5.4645
2	3	15.55
2	3	3.502
2	3	18.185
2	3	2.6949
2	3	2.2663
2	3	3.7234
2	3	8.9073
2	3	14.04
2	3	6.9224
2	3	4.4276
2	3	0.52458
2	3	5.2431
2	3	4.8951
2	3	1.823
2	3	12.223
2	3	8.8657
2	3	10.891
2	3	8.6594
2	3	11.191
2	3	14.405
2	3	2.5799
2	3	15.448
2	3	15.02
2	3	5.0628
2	3	6.5631
2	3	12.774
2	3	8.0015
2	3	0.51144
2	3	17.212
2	3	8.5094
2	3	9.3515
2	3	17.222
2	3	0.80462
2	3	2.7413
2	3	10.002
2	3	13.864
2	3	3.552
2	3	3.3774
2	3	11.759
2	3	1.8687
2	3	13.228
2	3	5.9952
2	3	2.0612
2	3	8.7811
2	3	7.98
2	3	5.4115
2	3	8.0216
2	3	6.1946
2	3	1.3258
2	3	3.4802
2	3	5.868
2	3	1.7546
2	3	8.6077
2	3	2.6836
2	3	10.561
2	3	12.593
2	3	9.097
2	3	5.1107
2	3	15.446
2	3	14.433
2	3	12.255
2	3	12.258
2	3	9.3128
2	3	4.6289
2	3	9.9598
2	3	10.616
2	3	7.0753
2	3	10.717
2	3	13.014
2	3	2.3284
2	3	8.6365
2	3	18.642
2	3	5.8447
2	3	7.4783
2	3	6.8091
2	3	14.862
2	3	10.759
2	3	9.585
2	3	6.9899
2	3	14.101
2	3	4.3204
2	3	11.419
2	3	0.27262
2	3	10.33
2	3	6.9871
2	3	10.646
2	3	0.22359
2	3	9.4271
2	3	6.3995
2	3	3.4365
2	3	2.4729
2	3	17.246
2	3	3.4025
2	3	14.355
2	3	4.4598
2	3	4.193
2	3	11.438
2	3	14.984
2	3	0.18859
2	3	8.4125
2	3	6.7059
2	3	8.879
2	3	10.352
2	3	11.315
2	3	18.608
2	3	4.6575
2	3	8.7453
2	3	14.156
2	3	11.645
2	3	0.80584
2	3	6.7353
3	1	4.098
3	1	5.7386
3	1	0.59356
3	1	4.3261
3	1	3.0042
3	1	2.8606
3	1	5.24
3	1	0.046727
3	1	9.4022
3	1	2.4628
3	1	10.49
3	1	1.9133
3	1	0.94117
3	1	6.8915
3	1	2.9922
3	1	5.3965
3	1	3.1858
3	1	5.4862
3	1	3.0734
3	1	3.3265
3	1	3.8008
3	1	4.7759
3	1	7.8855
3	1	4.6661
3	1	5.0147
3	1	5.1313
3	1	3.0402
3	1	2.7805
3	1	5.9936
3	1	4.6488
3	1	4.6972
3	1	3.0975
3	1	0.64939
3	1	1.8373
3	1	8.9306
3	1	3.3474
3	1	7.8156
3	1	2.8441
3	1	0.51402
3	1	7.5979
3	1	1.1264
3	1	6.592
3	1	2.6336
3	1	5.7401
3	1	2.6321
3	1	6.7061
3	1	0.97723
3	1	7.1066
3	1	3.0157
3	1	4.7004
3	1	3.7527
3	1	6.0799
3	1	5.6224
3	1	8.1581
3	1	3.5817
3	1	3.8156
3	1	3.2609
3	1	10.128
3	1	4.1469
3	1	3.7668
3	1	2.5969
3	1	4.8775
3	1	1.0947
3	1	4.8666
3	1	4.7805
3	1	2.5698
3	1	4.2003
3	1	2.3107
3	1	8.6838
3	1	1.0305
3	1	6.6191
3	1	3.7052
3	1	6.9668
3	1	0.10706
3	1	11.111
3	1	2.57
3	1	2.3448
3	1	8.2065
3	1	3.1245
3	1	6.0391
3	1	1.1271
3	1	9.1138
3	1	0.85581
3	1	7.99
3	1	3.9026
3	1	0.88834
3	1	1.0551
3	1	5.3809
3	1	3.1447
3	1	5.8673
3	1	10.2
3	1	1.0558
3	1	2.1026
3	1	1.6338
3	1	3.9377
3	1	7.9733
3	1	9.2237
3	1	3.8008
3	1	4.206
3	1	4.886
3	1	1.6942
3	1	7.1535
3	1	3.5904
3	1	6.8079
3	1	2.8972
3	1	6.3277
3	1	2.3742
3	1	11.91
3	1	0.34957
3	1	7.217
3	1	5.8831
3	1	4.4631
3	1	3.5013
3	1	5.5509
3	1	1.0713
3	1	4.7947
3	1	10.141
3	1	5.8792
3	1	0.13104
3	1	3.0463
3	1	3.0538
3	1	1.6484
3	1	6.3251
3	1	2.4991
3	1	8.7742
3	1	1.5509
3	1	3.8614
3	1	6.8477
3	1	4.0529
3	1	0.47183
3	1	6.4849
3	1	0.61837
3	1	10.272
3	1	0.52682
3	1	2.2629
3	1	5.032
3	1	9.321
3	1	1.8513
3	1	8.118
3	1	1.915
3	1	5.9042
3	1	7.8837
3	1	0.37292
3	1	2.9589
3	1	8.9556
3	1	2.6687
3	1	4.328
3	1	1.0437
3	1	3.4685
3	1	0.15795
3	1	5.2114
3	1	4.5063
3	1	2.9922
3	1	5.1297
3	1	5.6184
3	1	0.35603
3	1	7.5736
3	1	6.3452
3	1	0.74237
3	1	8.6375
3	1	1.8371
3	1	5.8281
3	1	2.8516
3	1	2.2897
3	1	7.4977
3	1	0.83133
3	1	4.8363
3	1	4.5535
3	1	8.3253
3	1	0.49743
3	1	4.913
3	1	6.3151
3	1	5.7969
3	1	4.2316
3	1	6.9162
3	1	4.1547
3	1	8.5858
3	1	1.174
3	1	1.6638
3	1	6.7513
3	1	4.4658
3	1	8.5118
3	1	2.3518
3	1	7.2003
3	1	4.9073
3	1	1.9674
3	1	5.4549
3	1	2.5807
3	1	4.681
3	1	5.233
3	1	8.2828
3	1	1.3716
3	1	2.0176
3	1	0.20796
3	1	2.3456
3	1	8.567
3	1	6.747
3	1	2.9516
3	1	1.0073
3	1	0.75051
3	1	4.9332
3	1	6.1372
3	1	4.4803
3	1	9.1632
3	1	3.4664
3	1	4.9335
3	1	2.6716
3	1	7.4664
3	1	4.9519
3	1	0.45704
3	1	5.9548
3	1	3.9637
3	1	4.542
3	1	2.804
3	1	3.7315
3	1	3.4028
3	1	4.7304
3	1	10.785
3	1	3.0195
3	1	4.5364
3	1	8.5964
3	1	3.2412
3	1	1.6978
3	1	5.241
3	1	7.3752
3	1	1.2242
3	1	10.64
3	1	1.8629
3	1	3.7934
3	1	0.80032
3	1	2.3948
3	1	1.6244
3	1	4.7426
3	1	2.1299
3	1	7.4826
3	1	0.5203
3	1	8.5068
3	1	2.0062
3	1	5.5944
3	1	2.233
3	1	12.537
3	1	1.4511
3	1	7.4817
3	1	1.4452
3	1	4.6506
3	1	7.1489
3	1	5.1097
3	1	7.9591
3	1	2.6395
3	1	6.4826
3	1	12.798
3	1	3.6753
3	1	1.3475
3	1	2.3832
3	1	5.8118
3	1	5.8656
3	1	0.66025
3	1	1.3553
3	1	8.5685
3	1	0.94683
3	1	9.893
3	1	6.5149
3	1	3.0964
3	1	2.142
3	1	7.7703
3	1	3.0156
3	1	4.1205
3	1	1.3876
3	1	4.6071
3	1	2.5195
3	1	9.8578
3	1	7.2384
3	1	0.264
3	1	3.6676
3	1	4.4493
3	1	1.862
3	1	5.5334
3	1	0.05825
3	1	6.6057
3	1	2.9862
3	1	3.682
3	1	2.7201
3	1	4.9278
3	1	3.0178
3	1	3.0583
3	1	4.1263
3	1	1.7572
3	1	1.2485
3	1	0.29298
3	1	6.2834
3	1	3.6987
3	1	6.1733
3	1	5.8052
3	1	0.092175
3	1	5.2373
3	1	5.043
3	1	4.1758
3	1	1.0737
3	1	6.5678
3	1	6.4459
3	1	0.26299
3	1	6.3592
3	1	4.2247
3	1	5.7351
3	1	8.3301
3	1	5.4432
3	1	3.1674
3	1	4.1901
3	1	2.0907
3	1	3.4091
3	1	4.1744
3	1	4.2174
3	1	6.932
3	1	9.0773
3	1	8.1617
3	1	3.0404
3	1	5.2075
3	1	2.3557
3	1	3.7229
3	1	4.8999
3	1	6.1246
3	1	0.039487
3	1	10.774
3	1	1.9307
3	1	4.8072
3	1	4.2429
3	1	2.677
3	1	4.3212
3	1	11.337
3	1	2.0601
3	1	13.681
3	1	0.74838
3	1	14.904
3	1	3.4288
3	1	5.6358
3	1	4.0694
3	1	1.913
3	1	3.6963
3	1	4.3199
3	1	0.69189
3	1	5.109
3	1	6.9275
3	1	3.0658
3	1	6.0171
3	1	1.6838
3	1	0.29618
3	1	6.5676
3	1	1.6654
3	1	7.3471
3	1	6.9107
3	1	5.6064
3	1	4.0286
3	1	2.5962
3	1	2.5177
3	1	0.032322
3	1	6.8639
3	1	6.7039
3	1	1.0637
3	1	4.0463
3	1	3.7608
3	1	0.64798
3	1	4.3966
3	1	1.3903
3	1	5.4506
3	1	7.6737
3	1	4.5238
3	1	0.31182
3	1	4.246
3	2	4.3438
3	2	6.9107
3	2	6.3394
3	2	2.9101
3	2	5.2855
3	2	1.7669
3	2	5.8741
3	2	5.4513
3	2	0.16826
3	2	1.5917
3	2	6.9775
3	2	4.4486
3	2	4.6723
3	2	4.1457
3	2	3.7092
3	2	8.1513
3	2	3.6212
3	2	10.876
3	2	4.0103
3	2	0.45785
3	2	3.0405
3	2	0.86731
3	2	4.2372
3	2	2.7591
3	2	0.18745
3	2	3.698
3	2	6.9665
3	2	2.1056
3	2	6.4944
3	2	10.642
3	2	1.0202
3	2	4.5949
3	2	15.395
3	2	2.9534
3	2	15.8
3	2	2.5278
3	2	25.618
3	2	4.8159
3	2	4.1553
3	2	2.2091
3	2	4.1552
3	2	5.6597
3	2	1.0268
3	2	1.3054
3	2	3.6119
3	2	1.9959
3	2	1.0535
3	2	0.63548
3	2	4.6617
3	2	3.9108
3	2	2.3542
3	2	11.351
3	2	0.30195
3	2	3.4887
3	2	0.24779
3	2	2.6967
3	2	0.19779
3	2	4.1979
3	2	10.337
3	2	9.6262
3	2	10.253
3	2	0.60701
3	2	3.2073
3	2	3.3578
3	2	5.9483
3	2	1.387
3	2	5.5629
3	2	7.4843
3	2	1.6141
3	2	1.2917
3	2	3.015
3	2	4.0366
3	2	6.6264
3	2	5.041
3	2	1.0881
3	2	5.5343
3	2	3.9031
3	2	1.4966
3	2	0.38323
3	2	5.3459
3	2	3.9711
3	2	2.1629
3	2	4.6113
3	2	9.2244
3	2	3.5792
3	2	6.7383
3	2	10.585
3	2	4.9035
3	2	2.3949
3	2	9.5824
3	2	2.1758
3	2	1.3962
3	2	6.4277
3	2	14.304
3	2	8.269
3	2	3.1326
3	2	3.9191
3	2	4.8172
3	2	23.049
3	2	9.8834
3	2	1.9191
3	2	1.2394
3	2	4.1461
3	2	0.89598
3	2	8.8451
3	2	5.7015
3	3	4.3764
3	3	9.7944
3	3	4.6424
3	3	3.9193
3	3	10.191
3	3	1.5383
3	3	3.0085
3	3	2.5672
3	3	2.6707
3	3	9.3496
3	3	3.7337
3	3	11.91
3	3	4.4746
3	3	1.5719
3	3	1.0517
3	3	1.9772
3	3	2.8236
3	3	3.2186
3	3	0.08794
3	3	2.8482
3	3	6.3094
3	3	12.087
3	3	1.9753
3	3	14.164
3	3	4.7853
3	3	12.991
3	3	6.836
3	3	6.7845
3	3	6.2294
3	3	7.5349
3	3	4.9993
3	3	2.0013
3	3	1.9105
3	3	9.7767
3	3	4.9307
3	3	4.898
3	3	0.10671
3	3	13.49
3	3	6.3089
3	3	3.6938
3	3	3.3988
3	3	8.7035
3	3	11.236
3	3	3.2743
3	3	8.3655
3	3	11.996
3	3	3.3042
3	3	10.927
3	3	5.1945
3	3	3.5186
3	3	2.0695
3	3	5.3478
3	3	8.7115
3	3	7.806
3	3	5.538
3	3	7.5812
3	3	2.7543
3	3	6.8091
3	3	3.05
3	3	10.832
3	3	3.7045
3	3	11.784
3	3	0.44348
3	3	3.1934
3	3	6.7957
3	3	2.0056
3	3	5.7405
3	3	0.14767
3	3	9.0634
3	3	5.3203
3	3	8.3653
3	3	3.5549
3	3	7.3204
3	3	3.0928
3	3	3.2525
3	3	4.2658
3	3	5.5404
3	3	6.3361
3	3	0.97186
3	3	7.2659
3	3	13.147
3	3	10.489
3	3	6.0293
3	3	7.3034
3	3	0.14759
3	3	4.6674
3	3	7.4785
3	3	1.9766
3	3	6.3902
3	3	3.8967
3	3	4.5186
3	3	6.2651
3	3	4.3871
3	3	8.2503
3	3	7.6883
3	3	0.94303
3	3	3.1157
3	3	3.2875
3	3	3.5432
3	3	14.56
3	3	10.57
3	3	2.458
3	3	4.1167
3	3	6.6742
3	3	6.5942
3	3	6.517
3	3	9.4789
3	3	0.11272
3	3	9.5902
3	3	3.4158
3	3	6.6257
3	3	2.5538
3	3	0.3868
3	3	5.1527
3	3	2.3274
3	3	2.7511
3	3	0.26855
3	3	4.1505
3	3	13.529
3	3	8.1929
3	3	0.18466
3	3	4.1405
3	3	1.4586
3	3	0.80169
3	3	3.7386
3	3	4.0091
3	3	1.3576
3	3	5.9762
3	3	11.406
3	3	3.2213
3	3	6.2091
3	3	7.5844
3	3	0.94105
3	3	9.8729
3	3	2.4296
3	3	4.4296
3	3	8.3447
3	3	4.5609
3	3	3.1185
3	3	0.27428
3	3	3.6332
3	3	2.4387
3	3	1.537
3	3	6.4806
3	3	1.4072
3	3	8.4912
3	3	6.1435
3	3	5.1152
3	3	3.4816
3	3	8.1032
3	3	1.4626
3	3	10.886
3	3	2.9731
3	3	0.53361
3	3	6.6046
3	3	4.574
3	3	9.0691
3	3	1.0236
3	3	7.2504
3	3	2.449
3	3	2.2914
3	3	3.2822
3	3	5.0751
3	3	0.90373
3	3	3.7407
3	3	10.326
3	3	4.5275
3	3	0.35276
3	3	11.62
3	3	1.6896
3	3	3.3406
3	3	0.66424
3	3	4.1431
3	3	1.7807
3	3	0.48976
3	3	1.1418
3	3	3.3343
3	3	1.9584
3	3	1.2768
3	3	7.4744
3	3	8.5329
3	3	6.0246
3	3	0.93258
3	3	1.6491
3	3	1.0075
3	3	8.4703
3	3	0.067168
3	3	4.3647
3	3	0.6896
3	3	2.8687
3	3	3.9594
3	3	13.714
3	3	4.9493
3	3	1.0448
3	3	2.4889
3	3	3.0337
3	3	0.79268
3	3	1.072
3	3	6.6992
[truncated: 5,778 more rows]
