# Supplementary material for: How human runners regulate footsteps on uneven terrain
Source: eLife journal article supplement (doi:10.7554/elife.67177), 2023-02-22
Supplement: supp [file elife-67177-supp-v1.zip › elife_poa_e67177_Table_1_source_data_1.csv]

subject	terrain_type	pij	mean_terrain_height_units_mm	inter_quartile_range_of_terrain_height_units_mm
1	2	0.00041667	-2.9388	6.007
1	2	0.00058824	5.1972	8.2022
1	2	0.001087	-1.7468	7.0818
1	2	0.0025615	-6.1702	4.1328
1	2	0.001461	-3.0557	9.2934
1	2	0.0014037	1.1018	3.7081
1	2	0.00096154	-1.6669	8.9349
1	2	0.0021786	-6.0567	1.8382
1	2	0.0012	3.7039	6.4023
1	2	0.0018692	4.5073	9.7393
1	2	0.002139	-1.9047	5.123
1	2	0.0013937	-0.16146	6.7044
1	2	0.00068847	-0.21823	10.582
1	2	0.0016863	-4.128	9.2607
1	2	0.0016556	-3.4499	2.5475
1	2	0.0023256	2.946	7.1634
1	2	0.0020101	-2.3451	5.6375
1	2	0.0017065	-4.3399	6.0719
1	2	0.0009901	11.067	10.05
1	2	0.0015666	10.424	10.812
1	2	0.0010959	3.079	5.0886
1	2	0.00058824	12.542	10.164
1	2	0.0019108	2.4179	8.0056
1	2	0.0014035	1.5432	7.1864
1	2	0.00078431	2.3975	2.4381
1	2	0.0025862	4.5667	11.204
1	2	0.0019417	6.0826	8.4869
1	2	0.0011494	-0.069947	4.3407
1	2	0.0013793	2.8314	6.5303
1	2	0.0034483	-1.0275	2.8574
1	2	0.00056391	-8.0986	13.706
1	2	0.0016304	-5.9659	10.392
1	2	0.0015369	-6.5908	13.573
1	2	0.001461	-6.6137	6.0663
1	2	0.0018717	-6.0375	7.8968
1	2	0.00096154	-5.1197	7.9501
1	2	0.0013072	-3.8631	6.8875
1	2	0.0012	-4.2709	7.0476
1	2	0.0037383	-6.5908	5.9772
1	2	0.0024955	-1.9244	11.03
1	2	0.0013937	-0.87221	6.4361
1	2	0.0013769	3.6192	7.7431
1	2	0.0023609	-0.91358	4.0543
1	2	0.0023179	1.8523	7.7285
1	2	0.0013289	-2.5484	3.8779
1	2	0.0020101	-2.1256	7.7791
1	2	0.0017065	1.9874	9.3076
1	2	0.0010435	-2.3884	5.1765
1	2	0.0034965	3.7059	10.295
1	2	0.0032877	6.857	4.564
1	2	0.0023529	10.388	5.8237
1	2	0.0025478	9.2514	5.743
1	2	0.0015686	0.18903	6.2791
1	2	0.0017241	0.47084	8.3163
1	2	0.0029126	4.0722	8.3145
1	2	0.0011494	6.2508	7.2096
1	2	0.0013793	4.1842	5.4518
1	2	0.0020202	3.7213	9.6962
1	2	0.0046512	4.827	11.262
1	2	0.0027778	9.2639	11.679
1	2	0.0041667	-0.030476	11
1	2	0.01	-4.8045	11.981
1	2	0.00054348	-9.2515	6.0459
1	2	0.0010246	-6.2248	6.1823
1	2	0.00048077	-4.1032	3.375
1	2	0.00087146	-3.8358	10.155
1	2	0.0004	-4.9883	6.9293
1	2	0.00035651	-2.5994	5.7538
1	2	0.00033727	2.3529	5.1336
1	2	0.00033113	2.8704	6.7229
1	2	0.00034783	-5.5851	4.5041
1	2	0.00086207	11.273	2.1763
1	3	0.00030912	1.8635	14.589
1	3	0.00033278	3.6373	13.36
1	3	0.00052219	-8.1796	8.7877
1	3	0.0011364	6.75	9.9942
1	3	0.0021407	17.38	14.665
1	3	0.0021164	12.79	15.202
1	3	0.0014151	-0.91537	22.839
1	3	0.00043764	7.8117	21.694
1	3	0.0024691	3.6103	8.95
1	3	0.0010989	14.633	17.272
1	3	0.0020833	-0.53377	17.38
1	3	0.0026846	11.871	13.696
1	3	0.00033167	14.43	11.324
1	3	0.0019802	2.9478	8.8779
1	3	0.00032733	1.4921	17.329
1	3	0.00063091	7.6197	7.2175
1	3	0.0012559	4.0496	12.904
1	3	0.0018547	-1.4219	16.263
1	3	0.0021407	-5.9422	12.27
1	3	0.0018547	0.4678	11.289
1	3	0.00062305	-7.61	7.5663
1	3	0.00031646	3.2609	9.7928
1	3	0.0012678	-1.1325	9.271
1	3	0.0022152	2.0232	5.4897
1	3	0.0015949	-13.582	19.113
1	3	0.00033278	5.6946	11.33
1	3	0.00035398	11.997	10.829
1	3	0.00076923	-0.086006	15.684
1	3	0.00041841	-1.807	10.532
1	3	0.0022936	1.6331	8.5273
1	3	0.0020888	3.5431	3.4494
1	3	0.0031546	-7.8227	18.095
1	3	0.0012712	6.0769	15.717
1	3	0.0030675	16.927	9.6618
1	3	0.0022727	4.9009	16.186
1	3	0.003211	9.5756	8.3315
1	3	0.0037037	11.656	8.9117
1	3	0.0014151	3.252	9.2218
1	3	0.00087527	8.1573	10.967
1	3	0.0012346	-9.3122	18.534
1	3	0.0011742	11.117	10.545
1	3	0.0054945	9.5235	11.59
1	3	0.0024306	9.5205	13.755
1	3	0.0026846	9.9395	17.735
1	3	0.0013267	3.8131	18.786
1	3	0.00033003	9.305	9.8994
1	3	0.001964	2.2721	17.549
1	3	0.0028708	-2.2252	6.8389
1	3	0.0024961	-0.90312	17.052
1	3	0.0043277	-0.22082	18.811
1	3	0.0018349	11.111	7.663
1	3	0.0027821	-4.9877	18.395
1	3	0.0015576	5.5329	14.482
1	3	0.0012658	1.842	12.489
1	3	0.00063391	-3.1354	14.63
1	3	0.0025316	3.2504	9.3834
1	3	0.0038278	3.301	16.197
1	3	0.0033278	7.3758	9.9149
1	3	0.0028319	-0.59987	14.933
1	3	0.00076923	3.9538	12.612
1	3	0.0020921	23.414	4.9798
1	3	0.0022936	12.952	9.8152
1	3	0.0020888	-7.0946	3.2154
1	3	0.0012618	1.735	11.792
1	3	0.00089286	9.2356	5.8883
1	3	0.0019608	3.1456	17.444
1	3	0.00056818	1.6454	9.2104
1	3	0.00053517	13.475	11.019
1	3	0.0004717	-3.958	15.257
1	3	0.00043764	5.6744	14.869
1	3	0.00033557	8.394	15.207
1	3	0.00031898	19.307	2.9321
1	3	0.00031201	3.109	5.8568
1	3	0.00031696	8.5287	13.003
1	3	0.00094937	-3.3492	11.272
1	3	0.00031898	-8.2752	7.0946
1	3	0.00033278	-6.5735	13.804
1	3	0.00045872	-0.50667	10.935
1	3	0.00063091	1.3877	14.845
1	3	0.00098039	6.0315	2.6891
1	3	0.0011194	6.2548	5.0884
2	2	0.0015625	1.1018	3.7081
2	2	0.00036765	-1.9047	5.123
2	2	0.00071813	2.946	7.1634
2	2	0.00035842	-2.3451	5.6375
2	2	0.0011742	-4.3399	6.0719
2	2	0.016361	10.424	10.812
2	2	0.00033333	3.079	5.0886
2	2	0.0025316	12.542	10.164
2	2	0.00036232	2.4179	8.0056
2	2	0.00036832	1.5432	7.1864
2	2	0.017803	10.462	8.0152
2	2	0.00075901	1.7932	5.7661
2	2	0.00042787	1.5552	8.5932
2	2	0.020524	-7.5991	10.046
2	2	0.00625	-6.0375	7.8968
2	2	0.019959	-6.5908	5.9772
2	2	0.00036496	-0.87221	6.4361
2	2	0.0032374	3.6192	7.7431
2	2	0.016876	-2.5484	3.8779
2	2	0.00072333	10.388	5.8237
2	2	0.00036232	9.2514	5.743
2	2	0.016096	0.47084	8.3163
2	2	0.0010256	4.0722	8.3145
2	2	0.0029963	4.1842	5.4518
2	2	0.00037594	-1.9412	4.5801
2	2	0.00037736	3.7213	9.6962
2	2	0.00037951	9.2639	11.679
2	2	0.00042644	-0.030476	11
2	2	0.0025672	-1.3191	3.4926
2	2	0.00043668	-1.5667	10.544
2	2	0.00073529	-2.5994	5.7538
2	3	0.00046468	3.0692	12.967
2	3	0.00036364	11.359	6.693
2	3	0.00035971	-3.907	17.278
2	3	0.00044843	-8.1796	8.7877
2	3	0.00049342	18.386	11.697
2	3	0.00092937	16.423	10.768
2	3	0.0013953	12.79	15.202
2	3	0.0013043	-0.91537	22.839
2	3	0.0020534	7.8117	21.694
2	3	0.0023622	3.6103	8.95
2	3	0.0007722	2.7626	17.129
2	3	0.00075758	14.633	17.272
2	3	0.0014625	-0.53377	17.38
2	3	0.00036364	11.871	13.696
2	3	0.0032787	14.43	11.324
2	3	0.0014599	2.9478	8.8779
2	3	0.0011278	1.4921	17.329
2	3	0.0007286	7.6197	7.2175
2	3	0.00072727	4.0496	12.904
2	3	0.0018182	-1.4219	16.263
2	3	0.0017953	-5.9422	12.27
2	3	0.0010772	0.4678	11.289
2	3	0.0010791	-7.61	7.5663
2	3	0.0017857	3.2609	9.7928
2	3	0.00071685	-1.1325	9.271
2	3	0.0003643	2.0232	5.4897
2	3	0.00073394	-13.582	19.113
2	3	0.0018762	5.6946	11.33
2	3	0.0015504	11.997	10.829
2	3	0.0011905	-0.086006	15.684
2	3	0.00041068	-1.807	10.532
2	3	0.00086022	1.6331	8.5273
2	3	0.00044843	3.5431	3.4494
2	3	0.00047281	-7.8227	18.095
2	3	0.00096953	-6.6025	13.337
2	3	0.0039604	-0.8569	20.139
2	3	0.001	0.41299	18.68
2	3	0.00052356	1.5863	11.642
2	3	0.0019417	0.98974	7.4022
2	3	0.00098684	6.0769	15.717
2	3	0.0024038	16.927	9.6618
2	3	0.0027881	10.705	13.622
2	3	0.0018462	4.9009	16.186
2	3	0.0022668	9.5756	8.3315
2	3	0.0037209	11.656	8.9117
2	3	0.0013043	3.252	9.2218
2	3	0.0020534	8.1573	10.967
2	3	0.0015748	-9.3122	18.534
2	3	0.0007722	11.117	10.545
2	3	0.0018939	9.5235	11.59
2	3	0.0036563	9.5205	13.755
2	3	0.0014545	9.9395	17.735
2	3	0.0029144	3.8131	18.786
2	3	0.0014599	9.305	9.8994
2	3	0.00075188	2.2721	17.549
2	3	0.0022857	-2.2252	6.8389
2	3	0.0022901	-0.90312	17.052
2	3	0.0010909	-0.22082	18.811
2	3	0.0021544	11.111	7.663
2	3	0.0017953	-4.9877	18.395
2	3	0.0017986	5.5329	14.482
2	3	0.0017857	1.842	12.489
2	3	0.0021505	-3.1354	14.63
2	3	0.0025501	3.2504	9.3834
2	3	0.0029358	3.301	16.197
2	3	0.0030019	7.3758	9.9149
2	3	0.0015504	-0.59987	14.933
2	3	0.0039683	3.9538	12.612
2	3	0.0016427	23.414	4.9798
2	3	0.0017204	12.952	9.8152
2	3	0.0013453	-7.0946	3.2154
2	3	0.00047281	1.735	11.792
2	3	0.0029086	1.5873	12.732
2	3	0.0024752	2.0374	11.544
2	3	0.0015	9.2356	5.8883
2	3	0.0015707	3.1456	17.444
2	3	0.0010791	-10.146	9.7877
2	3	0.0013601	13.475	11.019
2	3	0.00046512	4.491	17.663
2	3	0.00086957	-3.958	15.257
2	3	0.00075758	3.3417	23.684
2	3	0.00073126	12.972	8.3292
2	3	0.00037594	5.8779	16.549
2	3	0.00038095	19.307	2.9321
2	3	0.00076336	3.109	5.8568
2	3	0.00071813	10.941	11.002
2	3	0.0010714	11.122	4.7164
2	3	0.00041068	-10.494	10.147
2	3	0.00044843	9.6446	8.6864
2	3	0.0018913	1.3877	14.845
2	3	0.00049505	-9.1096	12.356
2	3	0.0005	2.0474	8.9279
2	3	0.00052356	6.0315	2.6891
3	2	0.016816	-4.8523	3.8548
3	2	0.0011111	-1.7468	7.0818
3	2	0.00060976	-1.6669	8.9349
3	2	0.00052083	-6.0567	1.8382
3	2	0.019462	3.7039	6.4023
3	2	0.00037383	4.5073	9.7393
3	2	0.0007286	-0.21823	10.582
3	2	0.0014414	-4.128	9.2607
3	2	0.00035778	-3.4499	2.5475
3	2	0.00035714	2.946	7.1634
3	2	0.00038685	-2.3451	5.6375
3	2	0.016491	11.067	10.05
3	2	0.0014035	10.424	10.812
3	2	0.00076775	3.079	5.0886
3	2	0.00038986	2.4179	8.0056
3	2	0.00077973	1.5432	7.1864
3	2	0.017658	4.5667	11.204
3	2	0.00035971	6.0826	8.4869
3	2	0.00035971	-0.069947	4.3407
3	2	0.00035714	2.8314	6.5303
3	2	0.0014159	3.125	5.7812
3	2	0.00070796	3.0749	7.7029
3	2	0.016039	10.462	8.0152
3	2	0.00035842	-1.0275	2.8574
3	2	0.00071721	1.5552	8.5932
3	2	0.0007109	1.6281	3.0299
3	2	0.00041667	-7.4814	9.7509
3	2	0.00083333	-6.5908	13.573
3	2	0.0014218	-6.6137	6.0663
3	2	0.0019301	-6.0375	7.8968
3	2	0.0010417	-3.8631	6.8875
3	2	0.00037383	-6.5908	5.9772
3	2	0.00074074	-1.9244	11.03
3	2	0.00073529	-0.87221	6.4361
3	2	0.0010714	-2.5484	3.8779
3	2	0.00038685	-2.1256	7.7791
3	2	0.0007722	1.9874	9.3076
3	2	0.0011561	-2.3884	5.1765
3	2	0.00038462	3.7059	10.295
3	2	0.00038835	10.388	5.8237
3	2	0.0015595	9.2514	5.743
3	2	0.00038986	4.2782	10.722
3	2	0.00035971	4.0722	8.3145
3	2	0.00035971	6.2508	7.2096
3	2	0.00071429	4.1842	5.4518
3	2	0.00035398	-1.9412	4.5801
3	2	0.00032841	9.2639	11.679
3	2	0.00071685	5.9471	7.3991
3	2	0.001085	-0.030476	11
3	2	0.00071721	-1.3191	3.4926
3	2	0.016901	-4.8045	11.981
3	2	0.00041436	-7.1372	3.683
3	2	0.00052083	-3.8358	10.155
3	2	0.00038462	-5.687	12.071
3	3	0.00038835	1.6677	5.5289
3	3	0.00082645	-3.3391	15.257
3	3	0.00042644	1.0817	8.2969
3	3	0.00091743	-0.88784	7.4628
3	3	0.00079114	7.4473	9.1001
3	3	0.0007109	1.7422	8.8316
3	3	0.00065056	0.049871	5.1397
3	3	0.0015707	-7.9987	10.917
3	3	0.00093458	13.104	5.6352
3	3	0.0017316	10.798	5.6922
3	3	0.00040984	-3.3401	23.252
3	3	0.0011858	8.1812	14.272
3	3	0.001145	6.3964	6.5817
3	3	0.0018727	1.86	6.7479
3	3	0.0018622	7.5595	22.373
3	3	0.0018692	6.5073	19.79
3	3	0.00037383	3.9555	8.8296
3	3	0.00037453	-2.7421	10.838
3	3	0.0011605	6.044	11.871
3	3	0.001165	-6.8813	9.4433
3	3	0.00077973	-4.9184	8.7131
3	3	0.00078125	-0.38418	1.8671
3	3	0.0015444	-4.5651	11.611
3	3	0.001165	3.8778	9.3323
3	3	0.00039063	-2.3335	5.488
3	3	0.00039604	4.6278	6.2195
3	3	0.0016064	-8.4298	7.9349
3	3	0.001222	6.0165	17.051
3	3	0.0012397	-0.65357	19.503
3	3	0.0012793	1.9018	5.294
3	3	0.00044543	1.0247	10.229
3	3	0.0013953	16.378	18.191
3	3	0.0004717	2.1279	29.735
3	3	0.00095109	-9.797	16.427
3	3	0.00096463	3.4218	13.062
3	3	0.00098039	-1.9639	12.574
3	3	0.0014706	0.050937	7.0902
3	3	0.00048387	-3.3555	14.81
3	3	0.00079114	13.656	9.4571
3	3	0.0007109	-1.3223	14.022
3	3	0.0045539	7.5187	17.381
3	3	0.0042553	-3.6021	5.235
3	3	0.0036649	3.5878	16.05
3	3	0.0028037	-7.6888	8.5073
3	3	0.0030303	-9.5673	5.965
3	3	0.0020492	9.8123	1.649
3	3	0.0011858	15.039	9.6725
3	3	0.0038168	-1.2691	20.641
3	3	0.0011236	15.028	13.956
3	3	0.0018622	4.941	10.539
3	3	0.00037383	4.1406	8.2627
3	3	0.0029907	-10.003	14.19
3	3	0.0022472	2.8348	16.381
3	3	0.0033771	1.9305	12.166
3	3	0.0031189	4.4194	18.8
3	3	0.0011719	5.6318	20.273
3	3	0.0015625	-6.44	7.5989
3	3	0.0034749	2.6103	9.2059
3	3	0.001165	-1.2941	13.595
3	3	0.0019531	-4.5991	2.4299
3	3	0.0019802	-5.4404	8.2465
3	3	0.002008	-6.8329	8.2672
3	3	0.0020367	3.208	13.739
3	3	0.0028926	-9.0458	19.022
3	3	0.0012793	0.2181	13.099
3	3	0.0017817	7.658	10.769
3	3	0.00091533	14.117	16.207
3	3	0.00093023	13.672	6.5108
3	3	0.0033019	16.611	11.637
3	3	0.00095109	7.9632	22.874
3	3	0.0024116	12.713	22.53
3	3	0.0014706	0.12645	12.682
3	3	0.0019608	1.1425	13.985
3	3	0.003871	7.2226	13.456
3	3	0.00095238	0.96858	15.538
3	3	0.0004902	-0.94991	16.485
3	3	0.0006079	18.419	13.377
3	3	0.00039526	-8.5916	11.749
3	3	0.00076336	17.397	6.4011
3	3	0.00037453	13.814	8.419
3	3	0.00037244	-1.6849	14.418
3	3	0.00074766	7.3661	6.4571
3	3	0.00037453	3.1989	5.6331
3	3	0.00075047	-9.0914	20.194
3	3	0.0011215	1.0077	14.228
3	3	0.00075614	8.211	14.958
3	3	0.00075901	-3.6996	14.541
3	3	0.0015625	-9.1919	11.261
3	3	0.0007722	-3.6548	14.62
3	3	0.00038835	-5.9101	11.29
3	3	0.0011719	-2.2512	5.859
3	3	0.00040161	-9.0904	12.894
3	3	0.00041322	-2.7757	6.6868
3	3	0.00042644	2.2024	2.8941
3	3	0.00089087	-2.8443	20.274
3	3	0.001373	3.7611	21.027
3	3	0.0014151	15.462	16.763
3	3	0.0014266	2.5227	10.258
3	3	0.00048232	22.297	13.58
3	3	0.0004902	-5.8743	13.983
3	3	0.0004902	11.98	16.76
3	3	0.00038835	-5.9032	7.4126
4	2	0.00046083	1.545	4.0886
4	2	0.00037951	-8.703	9.8597
4	2	0.00032787	0.91584	11.54
4	2	0.0011312	-1.4137	6.9179
4	2	0.0016129	0.67495	13.071
4	2	0.0015351	-1.1481	7.7381
4	2	0.0013825	-0.90678	9.0627
4	2	0.0028866	-0.26923	7.071
4	2	0.0011385	6.5106	12.786
4	2	0.0007286	-1.6304	8.6088
4	2	0.00035587	-7.6967	8.9075
4	2	0.001692	-7.8536	8.4747
4	2	0.0013289	-4.1155	7.1929
4	2	0.00066007	-1.5384	9.3956
4	2	0.00099668	-1.9767	8.2499
4	2	0.0016694	-3.1949	10.809
4	2	0.0006689	-1.2366	6.358
4	2	0.001318	-3.3109	8.2857
4	2	0.00098522	-7.4006	3.2988
4	2	0.0013245	-0.15798	11.968
4	2	0.00066445	-3.3519	8.9058
4	2	0.0016393	-6.0989	11.849
4	2	0.00097561	-5.4284	8.7759
4	2	0.0025806	-7.498	7.2997
4	2	0.00096774	-5.7578	5.8269
4	2	0.0013072	1.3613	7.9754
4	2	0.00033058	7.2178	9.5393
4	2	0.0010204	5.0722	4.878
4	2	0.0014035	9.777	11.607
4	2	0.0014545	5.6521	5.8704
4	2	0.0011538	6.085	9.4579
4	2	0.0012371	6.7867	6.9689
4	2	0.00089888	3.7542	3.3287
4	2	0.0023333	10.023	8.3921
4	2	0.0004886	6.4626	11.864
4	2	0.00051653	1.0787	7.4062
4	2	0.0011111	-0.31851	5.9338
4	2	0.0012579	-5.8077	8.3701
4	2	0.0039593	-3.0288	17.303
4	2	0.00053763	2.7308	5.5475
4	2	0.0015351	2.7402	8.95
4	2	0.00051546	0.063513	8.6147
4	2	0.0018433	-3.5357	7.8044
4	2	0.0028866	-4.5248	7.2571
4	2	0.0034156	-2.5986	20.623
4	2	0.0018215	9.5343	15.636
4	2	0.0021352	-5.5714	7.9574
4	2	0.0031034	-0.90494	4.1449
4	2	0.0013536	3.1665	7.9298
4	2	0.0033223	-2.7558	3.6242
4	2	0.0036304	-4.0948	6.5069
4	2	0.0013289	-1.6872	7.6275
4	2	0.0013356	0.71346	11.44
4	2	0.0023372	0.93336	4.9582
4	2	0.0013423	10.59	12.418
4	2	0.0026273	-6.5444	3.7046
4	2	0.0016556	-3.8875	9.6953
4	2	0.0016611	0.13493	9.6749
4	2	0.0019672	-0.28407	8.4153
4	2	0.0019512	-7.3347	6.5137
4	2	0.0025806	-7.1727	9.0431
4	2	0.0025806	-1.0361	11.304
4	2	0.00098039	-3.3704	11.461
4	2	0.0016529	-8.0221	5.5659
4	2	0.0036851	-5.8575	8.4045
4	2	0.0010204	-2.2061	8.5827
4	2	0.0031579	4.4458	4.1631
4	2	0.0018182	9.3866	9.0404
4	2	0.0019231	7.3833	7.6528
4	2	0.0016495	0.37829	10.288
4	2	0.0013483	7.8388	7.9876
4	2	0.0018667	7.0485	6.2982
4	2	0.0009772	12.52	6.3308
4	2	0.0030992	7.0658	9.5707
4	2	0.0011312	-4.4901	17.182
4	2	0.00053763	-2.0286	14.871
4	2	0.0010234	1.2415	9.4143
4	2	0.00051546	3.2406	3.8323
4	2	0.00041237	-0.93883	11.988
4	2	0.0010676	2.213	9.7162
4	2	0.00033841	-1.6312	3.9089
4	2	0.00033223	-4.367	9.4993
4	2	0.00033003	-5.1724	6.3747
4	2	0.00033223	-5.3034	7.1445
4	2	0.00033613	-1.4358	7.7019
4	2	0.00064516	3.3228	13.052
4	2	0.00098039	-4.6018	15.523
4	2	0.00033058	-7.7459	15.655
4	2	0.00067002	-8.9332	8.4013
4	2	0.00068027	-7.095	10.136
4	2	0.00035088	-3.5283	10.293
4	2	0.00036364	-3.6503	14.861
4	2	0.0011538	3.1641	13.284
4	2	0.00046667	0.99356	2.0256
4	2	0.0009772	0.87273	9.7417
4	2	0.00051653	8.0728	14.218
4	2	0.0016667	5.7203	6.4671
4	3	0.00034722	-2.9305	2.5725
4	3	0.00040984	0.79648	8.4543
4	3	0.0014423	16.423	10.768
4	3	0.00086768	12.79	15.202
4	3	0.00078895	-0.91537	22.839
4	3	0.0007286	7.8117	21.694
4	3	0.0020654	3.6103	8.95
4	3	0.00099338	2.7626	17.129
4	3	0.00065466	14.633	17.272
4	3	0.00064725	11.871	13.696
4	3	0.001278	14.43	11.324
4	3	0.00063191	1.4921	17.329
4	3	0.00096774	7.6197	7.2175
4	3	0.00063898	4.0496	12.904
4	3	0.00032	-1.4219	16.263
4	3	0.00096618	-5.9422	12.27
4	3	0.00064725	0.4678	11.289
4	3	0.00064935	-7.61	7.5663
4	3	0.00032415	3.2609	9.7928
4	3	0.0016026	-1.1325	9.271
4	3	0.0016103	2.0232	5.4897
4	3	0.00032468	-13.582	19.113
4	3	0.00065789	5.6946	11.33
4	3	0.001	11.997	10.829
4	3	0.00033784	-0.086006	15.684
4	3	0.0010135	-1.807	10.532
4	3	0.00069444	1.6331	8.5273
4	3	0.00036496	3.5431	3.4494
4	3	0.00079007	-6.6025	13.337
4	3	0.00080645	-0.8569	20.139
4	3	0.0012295	0.41299	18.68
4	3	0.0012605	1.5863	11.642
4	3	0.001372	0.38896	13.223
4	3	0.0015789	16.927	9.6618
4	3	0.0024038	10.705	13.622
4	3	0.0031627	4.9009	16.186
4	3	0.0021499	9.5756	8.3315
4	3	0.0021692	11.656	8.9117
4	3	0.0019724	3.252	9.2218
4	3	0.0029144	8.1573	10.967
4	3	0.0030981	-9.3122	18.534
4	3	0.0023179	11.117	10.545
4	3	0.0022913	9.5235	11.59
4	3	0.0019512	9.5205	13.755
4	3	0.00097087	9.9395	17.735
4	3	0.0028754	3.8131	18.786
4	3	0.0034921	9.305	9.8994
4	3	0.0031596	2.2721	17.549
4	3	0.0015924	-2.2252	6.8389
4	3	0.0022436	-0.90312	17.052
4	3	0.0032	-0.22082	18.811
4	3	0.00032206	11.111	7.663
4	3	0.0019417	-4.9877	18.395
4	3	0.00097403	5.5329	14.482
4	3	0.002269	1.842	12.489
4	3	0.0032051	-3.1354	14.63
4	3	0.0012882	3.2504	9.3834
4	3	0.0029221	3.301	16.197
4	3	0.0016447	7.3758	9.9149
4	3	0.002	-0.59987	14.933
4	3	0.0033784	3.9538	12.612
4	3	0.0030405	23.414	4.9798
4	3	0.003125	12.952	9.8152
4	3	0.0010949	-7.0946	3.2154
4	3	0.0015444	1.735	11.792
4	3	0.00079007	1.5873	12.732
4	3	0.0012097	2.0374	11.544
4	3	0.0045082	9.2356	5.8883
4	3	0.00042017	3.1456	17.444
4	3	0.00045732	-10.146	9.7877
4	3	0.00049505	-0.38986	9.5677
4	3	0.00090361	1.6454	9.2104
4	3	0.0012899	13.475	11.019
4	3	0.00043384	4.491	17.663
4	3	0.0019724	-3.958	15.257
4	3	0.000982	3.3417	23.684
4	3	0.0003252	12.972	8.3292
4	3	0.00097087	8.394	15.207
4	3	0.00095847	13.517	14.159
4	3	0.00031746	13.085	20.187
4	3	0.0012638	5.8779	16.549
4	3	0.0012821	3.109	5.8568
4	3	0.00032154	9.1324	10.793
4	3	0.00032258	-0.28757	12.088
4	3	0.00032362	10.941	11.002
4	3	0.00032468	8.9436	10.144
4	3	0.0012966	11.122	4.7164
4	3	0.00096154	8.5287	13.003
4	3	0.00032206	-3.3492	11.272
4	3	0.00032895	-6.5735	13.804
4	3	0.0013514	-10.494	10.147
4	3	0.00034722	-0.50667	10.935
4	3	0.0014599	9.6446	8.6864
4	3	0.0007722	1.3877	14.845
4	3	0.0016129	-9.1096	12.356
4	3	0.0012295	2.0474	8.9279
4	3	0.00032415	12.557	9.002
4	3	0.00042017	5.9493	2.5507
5	2	0.00033223	1.545	4.0886
5	2	0.0002681	-2.7975	10.194
5	2	0.00026525	-3.1065	8.4557
5	2	0.00027248	8.5923	12.622
5	2	0.0003003	15.701	8.5205
5	2	0.00040816	22.615	7.2782
5	2	0.00073099	1.4298	8.8239
5	2	0.00081301	-0.019665	10.027
5	2	0.00054945	2.5386	17.032
5	2	0.0015	8.6527	18.661
5	2	0.0013575	1.0174	12.521
5	2	0.00125	-1.4137	6.9179
5	2	0.0023499	0.67495	13.071
5	2	0.00037961	-1.1481	7.7381
5	2	0.0015123	3.409	7.3447
5	2	0.0033223	-0.90678	9.0627
5	2	0.0021244	-0.26923	7.071
5	2	0.0011628	6.5106	12.786
5	2	0.001707	-1.6304	8.6088
5	2	0.0024862	-4.8381	7.1504
5	2	0.0021448	-7.8536	8.4747
5	2	0.0010724	-4.1155	7.1929
5	2	0.0013661	-1.5384	9.3956
5	2	0.00082873	-1.9767	8.2499
5	2	0.00082645	-3.1949	10.809
5	2	0.0010811	-1.2366	6.358
5	2	0.0021769	-3.3109	8.2857
5	2	0.00027211	-7.4006	3.2988
5	2	0.0031915	-0.15798	11.968
5	2	0.0023529	-3.3519	8.9058
5	2	0.0010667	-6.0989	11.849
5	2	0.0018919	-5.4284	8.7759
5	2	0.0013532	-7.498	7.2997
5	2	0.0019048	-5.7578	5.8269
5	2	0.0035422	1.3613	7.9754
5	2	0.0022346	7.2178	9.5393
5	2	0.0003003	12.078	9.4057
5	2	0.0025397	5.0722	4.878
5	2	0.0023609	9.777	11.607
5	2	0.001105	5.6521	5.8704
5	2	0.002449	6.085	9.4579
5	2	0.00093677	6.7867	6.9689
5	2	0.0011173	3.7542	3.3287
5	2	0.0036332	10.023	8.3921
5	2	0.0012987	6.4626	11.864
5	2	0.001462	1.0787	7.4062
5	2	0.0009375	-1.1649	6.5348
5	2	0.001	-7.4008	4.6893
5	2	0.00045249	-5.8077	8.3701
5	2	0.00125	-3.0288	17.303
5	2	0.00078329	2.7308	5.5475
5	2	0.001898	2.7402	8.95
5	2	0.0011342	0.063513	8.6147
5	2	0.0036545	-3.5357	7.8044
5	2	0.0027314	-4.5248	7.2571
5	2	0.0023256	-2.5986	20.623
5	2	0.001138	9.5343	15.636
5	2	0.00084986	-5.5714	7.9574
5	2	0.0027624	-0.90494	4.1449
5	2	0.0024129	3.1665	7.9298
5	2	0.0024129	-2.7558	3.6242
5	2	0.0016393	-4.0948	6.5069
5	2	0.0019337	-1.6872	7.6275
5	2	0.00082645	0.71346	11.44
5	2	0.002953	0.93336	4.9582
5	2	0.0026385	10.59	12.418
5	2	0.00054422	-6.5444	3.7046
5	2	0.0031915	-3.8875	9.6953
5	2	0.0018301	0.13493	9.6749
5	2	0.0010667	-0.28407	8.4153
5	2	0.0013514	-7.3347	6.5137
5	2	0.0013532	-7.1727	9.0431
5	2	0.0010884	-1.0361	11.304
5	2	0.0027248	-3.3704	11.461
5	2	0.0013966	-8.0221	5.5659
5	2	0.0012012	-5.8575	8.4045
5	2	0.0022222	-2.2061	8.5827
5	2	0.00067454	4.4458	4.1631
5	2	0.0018416	9.3866	9.0404
5	2	0.002449	7.3833	7.6528
5	2	0.00093677	0.37829	10.288
5	2	0.0012111	7.0485	6.2982
5	2	0.0012987	12.52	6.3308
5	2	0.00073099	7.0658	9.5707
5	2	0.00033223	1.7077	4.6221
5	2	0.00030349	-0.93883	11.988
5	2	0.00027624	0.30241	9.6905
5	2	0.0002681	-4.367	9.4993
5	2	0.00026385	-1.929	9.3809
5	2	0.00026144	-9.5196	12.507
5	2	0.00027027	-9.4612	9.8051
5	2	0.00031746	-7.095	10.136
5	3	0.00022173	11.359	6.693
5	3	0.00041322	13.572	13.314
5	3	0.0010135	17.38	14.665
5	3	0.00033557	12.79	15.202
5	3	0.0015152	7.8117	21.694
5	3	0.0002454	2.7626	17.129
5	3	0.00049505	14.633	17.272
5	3	0.0033294	-0.53377	17.38
5	3	0.00050125	4.0496	12.904
5	3	0.0030127	-1.4219	16.263
5	3	0.0083978	-5.9422	12.27
5	3	0.00023753	-7.61	7.5663
5	3	0.0031288	-1.1325	9.271
5	3	0.011792	2.0232	5.4897
5	3	0.00026247	5.6946	11.33
5	3	0.00028736	11.997	10.829
5	3	0.00030349	-0.086006	15.684
5	3	0.0039867	1.6331	8.5273
5	3	0.00053191	-6.6025	13.337
5	3	0.0058065	6.0769	15.717
5	3	0.00037202	10.705	13.622
5	3	0.0027907	4.9009	16.186
5	3	0.004698	11.656	8.9117
5	3	0.0079096	3.252	9.2218
5	3	0.0060606	8.1573	10.967
5	3	0.0019584	-9.3122	18.534
5	3	0.00023781	9.5205	13.755
5	3	0.011308	9.9395	17.735
5	3	0.0033296	3.8131	18.786
5	3	0.0061086	-0.90312	17.052
5	3	0.0032445	-0.22082	18.811
5	3	0.00022099	11.111	7.663
5	3	0.0031355	-4.9877	18.395
5	3	0.00072202	1.842	12.489
5	3	0.00024067	-3.1354	14.63
5	3	0.0014269	3.301	16.197
5	3	0.0020997	7.3758	9.9149
5	3	0.00091047	3.9538	12.612
5	3	0.012625	12.952	9.8152
5	3	0.0026616	-7.0946	3.2154
5	3	0.00053191	1.5873	12.732
5	3	0.0010417	-10.146	9.7877
5	3	0.00025253	5.6744	14.869
5	3	0.00022396	10.941	11.002
5	3	0.00023781	-8.2752	7.0946
6	2	0.00071138	-0.36168	10.701
6	2	0.00070922	-1.0846	7.0946
6	2	0.00069444	2.3522	16.588
6	2	0.00071429	-4.6512	8.5812
6	2	0.0014388	2.4448	6.0011
6	2	0.0021552	-1.8941	5.2772
6	2	0.0014354	1.2439	1.5496
6	2	0.0035569	0.2217	5.0623
6	2	0.0022556	-1.2816	7.2008
6	2	0.001444	3.746	6.4023
6	2	0.0014388	4.5494	9.7393
6	2	0.0014388	-1.8626	5.123
6	2	0.0035461	-0.11936	6.7044
6	2	0.0021053	-0.17613	10.582
6	2	0.00070922	-4.0859	9.2607
6	2	0.00072202	-3.4078	2.5475
6	2	0.00073801	2.9881	7.1634
6	2	0.0023166	-2.303	5.6375
6	2	0.004918	-4.2978	6.0719
6	2	0.0022222	-0.8754	4.3911
6	2	0.0042254	4.1992	3.5667
6	2	0.0035714	-6.8703	6.7208
6	2	0.0023529	-6.3834	8.5483
6	2	0.0012658	-1.3501	9.6511
6	2	0.0057143	2.5759	6.934
6	2	0.0016	2.5498	5.9424
6	2	0.0014286	-0.19595	6.9279
6	2	0.00071942	-4.8869	5.6389
6	2	0.00071839	2.3471	8.4135
6	2	0.0021531	-4.123	4.1685
6	2	0.0014228	-2.2538	6.4847
6	2	0.0037594	6.5302	11.968
6	2	0.0014599	-1.4578	6.8987
6	2	0.001444	-5.8425	1.1215
6	2	0.0014388	-4.4011	6.905
6	2	0.0014388	-1.8823	11.03
6	2	0.00070922	-0.83011	6.4361
6	2	0.002807	3.6613	7.7431
6	2	0.0021277	-0.87148	4.0543
6	2	0.0021661	1.8944	7.7285
6	2	0.0007722	-2.0835	7.7791
6	2	0.002459	2.0295	9.3076
6	2	0.0027273	-2.3463	5.1765
6	2	0.0010753	3.748	10.295
6	2	0.0019048	-0.88243	10.78
6	2	0.0032258	6.1903	16.827
6	2	0.0042254	-0.4897	7.6762
6	2	0.003871	-1.277	2.6813
6	2	0.0025	0.85985	10.014
6	2	0.0012422	5.7086	10.035
6	2	0.0037037	8.1927	10.495
6	2	0.0035714	3.7938	8.9506
6	2	0.0036364	-2.9663	10.394
6	2	0.0012658	-7.3983	8.7828
6	2	0.0040816	-5.7663	9.6309
6	2	0.0028571	-3.2216	6.0122
6	2	0.0032	1.108	7.7533
6	2	0.0018519	-0.64176	4.3836
6	2	0.00072202	2.9125	6.7229
6	2	0.00073801	3.7804	4.3223
6	2	0.0010753	-5.6449	12.071
6	2	0.0012903	-0.63431	11.273
6	2	0.0013158	-8.6566	11.724
6	2	0.0016	-4.0253	10.182
6	3	0.00054348	1.0817	8.2969
6	3	0.00066667	1.7422	8.8316
6	3	0.0032051	0.049871	5.1397
6	3	0.0026144	-1.2744	8.5251
6	3	0.0018018	-7.9987	10.917
6	3	0.00057143	13.104	5.6352
6	3	0.0016438	10.798	5.6922
6	3	0.0016043	-3.3401	23.252
6	3	0.0026525	8.1812	14.272
6	3	0.0010526	6.3964	6.5817
6	3	0.0010471	1.86	6.7479
6	3	0.00052219	7.5595	22.373
6	3	0.0010444	6.5073	19.79
6	3	0.0015544	3.9555	8.8296
6	3	0.0020779	-2.7421	10.838
6	3	0.0015544	-6.8813	9.4433
6	3	0.0015345	-4.9184	8.7131
6	3	0.0010336	0.47339	6.0979
6	3	0.00052356	-0.38418	1.8671
6	3	0.0020566	3.8778	9.3323
6	3	0.0010178	-2.3335	5.488
6	3	0.0010256	4.6278	6.2195
6	3	0.00052493	-8.4298	7.9349
6	3	0.00054348	-0.65357	19.503
6	3	0.0016304	1.9018	5.294
6	3	0.0011204	1.0247	10.229
6	3	0.00059347	0.61365	9.2766
6	3	0.0027027	-9.797	16.427
6	3	0.00069124	3.4218	13.062
6	3	0.00079787	-3.3555	14.81
6	3	0.00081967	11.134	9.3816
6	3	0.0014925	5.0698	9.8852
6	3	0.0021067	13.656	9.4571
6	3	0.002	-1.3223	14.022
6	3	0.0019231	7.5187	17.381
6	3	0.00065359	-3.6021	5.235
6	3	0.0018018	3.5878	16.05
6	3	0.0017143	-7.6888	8.5073
6	3	0.0010959	-9.5673	5.965
6	3	0.00053476	9.8123	1.649
6	3	0.001061	15.039	9.6725
6	3	0.0010526	-1.2691	20.641
6	3	0.0026178	15.028	13.956
6	3	0.00052219	4.941	10.539
6	3	0.0031332	4.1406	8.2627
6	3	0.0015544	-10.003	14.19
6	3	0.00051948	2.8348	16.381
6	3	0.0020779	1.9305	12.166
6	3	0.002046	4.4194	18.8
6	3	0.0015504	5.6318	20.273
6	3	0.0015707	-6.44	7.5989
6	3	0.0015707	2.6103	9.2059
6	3	0.0010283	-1.2941	13.595
6	3	0.0020356	-4.5991	2.4299
6	3	0.0030769	-5.4404	8.2465
6	3	0.0015748	-6.8329	8.2672
6	3	0.0016086	3.208	13.739
6	3	0.0021739	-9.0458	19.022
6	3	0.0027174	0.2181	13.099
6	3	0.0016807	7.658	10.769
6	3	0.0011869	14.117	16.207
6	3	0.0018868	13.672	6.5108
6	3	0.0019934	16.611	11.637
6	3	0.00553	12.713	22.53
6	3	0.0021307	0.12645	12.682
6	3	0.00076336	1.1425	13.985
6	3	0.00079787	7.2226	13.456
6	3	0.00074627	-0.44185	10.127
6	3	0.0013333	8.0286	8.5115
6	3	0.00065359	18.419	13.377
6	3	0.0006006	4.2584	8.7136
6	3	0.00057143	4.6793	14.419
6	3	0.0016438	6.575	9.3074
6	3	0.0016043	1.955	9.792
6	3	0.0010526	17.397	6.4011
6	3	0.00052356	13.814	8.419
6	3	0.00052219	-1.6849	14.418
6	3	0.0010444	3.0712	14.987
6	3	0.00051813	7.3661	6.4571
6	3	0.00051948	3.1989	5.6331
6	3	0.00051948	-9.0914	20.194
6	3	0.00052356	1.0077	14.228
6	3	0.00053333	8.211	14.958
6	3	0.00054054	-3.6996	14.541
6	3	0.0020942	-3.6548	14.62
6	3	0.00051414	-5.9101	11.29
6	3	0.0015267	-2.2512	5.859
6	3	0.00052493	-9.0904	12.894
6	3	0.0010724	-2.5293	2.6277
6	3	0.001087	-2.7757	6.6868
6	3	0.0016304	2.2024	2.8941
6	3	0.00059347	3.7611	21.027
6	3	0.00062893	11.629	16.353
6	3	0.00066445	15.462	16.763
6	3	0.0013825	22.297	13.58
6	3	0.00071023	-5.8743	13.983
6	3	0.00079787	11.908	14.468
6	3	0.00070225	8.5481	10.892
6	3	0.00066445	12.54	16.056
7	2	0.0010724	-8.703	9.8597
7	2	0.0004902	-4.7996	5.9661
7	2	0.00043011	-3.7616	8.7837
7	2	0.00041152	-2.7975	10.194
7	2	0.001085	-3.1065	8.4557
7	2	0.00036166	4.77	12.312
7	2	0.00071429	-4.4634	7.7502
7	2	0.00035971	0.91584	11.54
7	2	0.0003663	8.5923	12.622
7	2	0.0011152	5.8188	5.1483
7	2	0.00038241	15.701	8.5205
7	2	0.0004008	15.931	16.436
7	2	0.00042283	11.148	8.9256
7	2	0.00097087	1.0174	12.521
7	2	0.0017986	-1.4137	6.9179
7	2	0.00083333	0.67495	13.071
7	2	0.00077434	-1.1481	7.7381
7	2	0.00076628	3.409	7.3447
7	2	0.00066667	-0.90678	9.0627
7	2	0.0016086	6.5106	12.786
7	2	0.0044118	-1.6304	8.6088
7	2	0.0013636	-7.6967	8.9075
7	2	0.0012903	-4.8381	7.1504
7	2	0.0012346	-7.8536	8.4747
7	2	0.0011952	-4.1155	7.1929
7	2	0.0027184	-1.5384	9.3956
7	2	0.0026769	-1.9767	8.2499
7	2	0.0026316	-3.1949	10.809
7	2	0.00217	-1.2366	6.358
7	2	0.001085	-3.3109	8.2857
7	2	0.00072072	-7.4006	3.2988
7	2	0.0021544	-0.15798	11.968
7	2	0.0021429	-3.3519	8.9058
7	2	0.0035971	-6.0989	11.849
7	2	0.00072333	-5.4284	8.7759
7	2	0.0007286	-7.498	7.2997
7	2	0.0018282	-5.7578	5.8269
7	2	0.0014652	1.3613	7.9754
7	2	0.0018587	7.2178	9.5393
7	2	0.0011472	12.078	9.4057
7	2	0.0028056	5.0722	4.878
7	2	0.00084567	9.777	11.607
7	2	0.00088692	5.6521	5.8704
7	2	0.0018913	6.085	9.4579
7	2	0.0015584	6.7867	6.9689
7	2	0.0011765	3.7542	3.3287
7	2	0.0013514	6.4626	11.864
7	2	0.0014368	1.0787	7.4062
7	2	0.00077519	-0.31851	5.9338
7	2	0.0053957	-3.0288	17.303
7	2	0.00083333	2.7308	5.5475
7	2	0.00077434	2.7402	8.95
7	2	0.002	-3.5357	7.8044
7	2	0.0017804	-4.5248	7.2571
7	2	0.0016086	-2.5986	20.623
7	2	0.0014706	9.5343	15.636
7	2	0.0027273	-5.5714	7.9574
7	2	0.00086022	-0.90494	4.1449
7	2	0.0016461	3.1665	7.9298
7	2	0.00079681	-2.7558	3.6242
7	2	0.001165	-4.0948	6.5069
7	2	0.0011472	-1.6872	7.6275
7	2	0.0033835	0.71346	11.44
7	2	0.0014925	0.93336	4.9582
7	2	0.0014953	10.59	12.418
7	2	0.0025225	-6.5444	3.7046
7	2	0.0010772	-3.8875	9.6953
7	2	0.0010714	0.13493	9.6749
7	2	0.0021583	-0.28407	8.4153
7	2	0.001085	-7.3347	6.5137
7	2	0.0018215	-7.1727	9.0431
7	2	0.0010969	-1.0361	11.304
7	2	0.0014652	-3.3704	11.461
7	2	0.00074349	-8.0221	5.5659
7	2	0.001912	-5.8575	8.4045
7	2	0.0012024	-2.2061	8.5827
7	2	0.00084567	4.4458	4.1631
7	2	0.0026608	9.3866	9.0404
7	2	0.0023641	7.3833	7.6528
7	2	0.0020779	0.37829	10.288
7	2	0.0011765	7.8388	7.9876
7	2	0.0006295	7.0485	6.2982
7	2	0.0033784	12.52	6.3308
7	2	0.00071839	7.0658	9.5707
7	2	0.00077519	7.0542	3.8097
7	2	0.00087209	7.1655	15.489
7	2	0.00089928	-4.4901	17.182
7	2	0.0016667	-2.0286	14.871
7	2	0.00077434	1.2415	9.4143
7	2	0.002	1.7077	4.6221
7	2	0.00059347	-0.93883	11.988
7	2	0.00039841	-4.367	9.4993
7	2	0.00038241	-5.3034	7.1445
7	2	0.00037383	-1.929	9.3809
7	2	0.00073126	3.3228	13.052
7	2	0.0007326	-4.6018	15.523
7	2	0.00037175	-7.7459	15.655
7	2	0.00038241	-8.9332	8.4013
7	2	0.00047281	3.1641	13.284
7	2	0.00058824	6.4403	6.3328
7	2	0.0006295	0.99356	2.0256
7	2	0.00067568	0.87273	9.7417
7	2	0.0004902	4.6748	10.022
7	3	0.00042463	9.5954	7.4328
7	3	0.00041408	-3.7194	18.321
7	3	0.0004	-14.49	8.3632
7	3	0.00051151	-11.828	3.8276
7	3	0.00084746	-0.88784	7.4628
7	3	0.0016892	7.4473	9.1001
7	3	0.0017045	1.7422	8.8316
7	3	0.0021341	0.049871	5.1397
7	3	0.00046296	-1.2744	8.5251
7	3	0.00090293	-7.9987	10.917
7	3	0.00087912	13.104	5.6352
7	3	0.00084926	10.798	5.6922
7	3	0.0012422	-3.3401	23.252
7	3	0.0012	8.1812	14.272
7	3	0.00038536	6.3964	6.5817
7	3	0.0011236	1.86	6.7479
7	3	0.00036232	7.5595	22.373
7	3	0.001049	6.5073	19.79
7	3	0.0010309	3.9555	8.8296
7	3	0.002381	-2.7421	10.838
7	3	0.0019531	6.044	11.871
7	3	0.0011928	-6.8813	9.4433
7	3	0.0016495	-4.9184	8.7131
7	3	0.0012821	0.47339	6.0979
7	3	0.00089485	-0.38418	1.8671
7	3	0.00093023	-4.5651	11.611
7	3	0.0014388	3.8778	9.3323
7	3	0.0019802	-2.3335	5.488
7	3	0.0015666	-8.4298	7.9349
7	3	0.001084	6.0165	17.051
7	3	0.001105	-0.65357	19.503
7	3	0.0022409	1.9018	5.294
7	3	0.0022857	1.0247	10.229
7	3	0.0036254	0.61365	9.2766
7	3	0.0013378	16.378	18.191
7	3	0.0023077	2.1279	29.735
7	3	0.0016432	-9.797	16.427
7	3	0.00096899	-1.9639	12.574
7	3	0.001264	4.0963	12.158
7	3	0.0021186	5.0698	9.8852
7	3	0.0021115	13.656	9.4571
7	3	0.0021307	-1.3223	14.022
7	3	0.002561	7.5187	17.381
7	3	0.0018519	-3.6021	5.235
7	3	0.0026374	-7.6888	8.5073
7	3	0.0029724	-9.5673	5.965
7	3	0.00041408	9.8123	1.649
7	3	0.0028	15.039	9.6725
7	3	0.0015414	-1.2691	20.641
7	3	0.0022472	15.028	13.956
7	3	0.0032609	4.941	10.539
7	3	0.0031469	4.1406	8.2627
7	3	0.0020619	-10.003	14.19
7	3	0.0013605	2.8348	16.381
7	3	0.0020478	1.9305	12.166
7	3	0.0045361	4.4194	18.8
7	3	0.00042735	5.6318	20.273
7	3	0.0013423	-6.44	7.5989
7	3	0.0013953	2.6103	9.2059
7	3	0.0014388	-1.2941	13.595
7	3	0.0024752	-4.5991	2.4299
7	3	0.0025575	-5.4404	8.2465
7	3	0.002611	-6.8329	8.2672
7	3	0.00054201	3.208	13.739
7	3	0.0022409	0.2181	13.099
7	3	0.0022857	7.658	10.769
7	3	0.0030211	14.117	16.207
7	3	0.0008216	7.9632	22.874
7	3	0.00087719	12.713	22.53
7	3	0.00096899	0.12645	12.682
7	3	0.00042135	12.162	10.944
7	3	0.00042373	-0.44185	10.127
7	3	0.0004223	2.3483	14.316
7	3	0.00042683	2.8927	11.822
7	3	0.0013889	18.419	13.377
7	3	0.00043956	4.6793	14.419
7	3	0.00041408	1.955	9.792
7	3	0.00077071	17.397	6.4011
7	3	0.00036232	-1.6849	14.418
7	3	0.0006993	3.0712	14.987
7	3	0.00068729	7.3661	6.4571
7	3	0.00068027	3.1989	5.6331
7	3	0.0003413	-9.0914	20.194
7	3	0.0006993	1.0077	14.228
7	3	0.00071301	8.211	14.958
7	3	0.0014235	-3.6996	14.541
7	3	0.00095923	-5.9101	11.29
7	3	0.00049505	-2.2512	5.859
7	3	0.00051151	1.1373	17.994
7	3	0.00057143	-2.8443	20.274
7	3	0.00060423	3.7611	21.027
7	3	0.0020067	11.629	16.353
7	3	0.00096899	-5.8743	13.983
8	2	0.00039683	-7.2757	8.5564
8	2	0.00036036	0.88575	10.386
8	2	0.00036036	-7.0765	4.1214
8	2	0.00080128	-1.8941	5.2772
8	2	0.0015075	1.2439	1.5496
8	2	0.0018382	0.2217	5.0623
8	2	0.0019231	-1.2816	7.2008
8	2	0.0007286	-6.0363	6.8575
8	2	0.00034483	3.746	6.4023
8	2	0.002623	4.5494	9.7393
8	2	0.0015974	-1.8626	5.123
8	2	0.0016181	-0.11936	6.7044
8	2	0.0013136	-0.17613	10.582
8	2	0.00065574	-4.0859	9.2607
8	2	0.001626	-3.4078	2.5475
8	2	0.0013093	2.9881	7.1634
8	2	0.0017036	-2.303	5.6375
8	2	0.00035524	-4.2978	6.0719
8	2	0.00038835	-5.6457	10.274
8	2	0.0018868	0.65455	2.4559
8	2	0.0011029	-0.8754	4.3911
8	2	0.0014493	0.20063	3.1087
8	2	0.001444	8.3792	11.718
8	2	0.0014467	6.2314	10.354
8	2	0.0018018	4.8728	10.95
8	2	0.0010811	2.4015	9.4623
8	2	0.0011009	-2.0808	5.772
8	2	0.0014842	-6.8703	6.7208
8	2	0.0011152	-6.3834	8.5483
8	2	0.0022514	-1.9097	9.232
8	2	0.00075901	-1.3501	9.6511
8	2	0.00078278	-0.88951	5.9204
8	2	0.00040241	-3.4019	7.6153
8	2	0.000818	2.5759	6.934
8	2	0.0012658	2.5498	5.9424
8	2	0.0021341	-1.275	9.4071
8	2	0.0026393	-1.9041	12.268
8	2	0.0013489	13.014	11.314
8	2	0.0018265	5.3589	6.4524
8	2	0.0023292	5.5652	7.458
8	2	0.0009434	7.6739	16.156
8	2	0.00042735	0.4148	12.586
8	2	0.0004386	-0.19595	6.9279
8	2	0.00042735	-4.8869	5.6389
8	2	0.0012019	2.3471	8.4135
8	2	0.0048995	-4.123	4.1685
8	2	0.0029412	-2.2538	6.4847
8	2	0.0019231	6.5302	11.968
8	2	0.0007286	-1.4578	6.8987
8	2	0.0027586	-5.8425	1.1215
8	2	0.0022951	-4.4011	6.905
8	2	0.0022364	-1.8823	11.03
8	2	0.0012945	-0.83011	6.4361
8	2	0.00065681	3.6613	7.7431
8	2	0.002623	-0.87148	4.0543
8	2	0.0039024	1.8944	7.7285
8	2	0.0022913	-2.5063	3.8779
8	2	0.0020443	-2.0835	7.7791
8	2	0.001421	2.0295	9.3076
8	2	0.0043956	-2.3463	5.1765
8	2	0.0014981	3.748	10.295
8	2	0.0029412	-8.532	4.4882
8	2	0.0014493	-0.88243	10.78
8	2	0.0036101	6.1903	16.827
8	2	0.0010909	-0.4897	7.6762
8	2	0.00217	-1.277	2.6813
8	2	0.0021622	0.85985	10.014
8	2	0.0018018	5.7086	10.035
8	2	0.0029358	8.1927	10.495
8	2	0.00074212	3.7938	8.9506
8	2	0.0033457	-2.1323	9.3243
8	2	0.0022514	-2.9663	10.394
8	2	0.001518	-7.3983	8.7828
8	2	0.0031311	-5.9888	8.0777
8	2	0.0020121	-5.7663	9.6309
8	2	0.00409	-3.2216	6.0122
8	2	0.0033755	1.108	7.7533
8	2	0.00042683	4.6754	8.9869
8	2	0.00087977	-0.64176	4.3836
8	2	0.00089928	0.73315	12.444
8	2	0.0013699	-0.99965	5.3028
8	2	0.0018634	6.8626	5.0945
8	2	0.00040064	-3.468	11.725
8	2	0.00036765	-3.122	11.925
8	2	0.00038462	-4.9454	13.907
8	2	0.00034483	-4.9936	7.8183
8	2	0.00032787	1.5312	6.3559
8	2	0.00063898	-1.3332	5.6289
8	2	0.00032733	3.7804	4.3223
8	2	0.0003663	-5.543	4.5041
8	2	0.00036166	-0.63431	11.273
8	2	0.00036036	1.514	6.6463
8	3	0.00037665	1.0817	8.2969
8	3	0.00068493	1.9074	9.319
8	3	0.0010766	1.1731	12.099
8	3	0.0010776	7.4473	9.1001
8	3	0.00071259	1.7422	8.8316
8	3	0.0028747	0.049871	5.1397
8	3	0.001938	-1.2744	8.5251
8	3	0.00072727	10.798	5.6922
8	3	0.0032727	-3.3401	23.252
8	3	0.00036765	8.1812	14.272
8	3	0.000369	7.5595	22.373
8	3	0.0018657	6.5073	19.79
8	3	0.0011321	3.9555	8.8296
8	3	0.00038388	-2.7421	10.838
8	3	0.00076336	6.044	11.871
8	3	0.00037453	-6.8813	9.4433
8	3	0.0014898	-4.9184	8.7131
8	3	0.00037383	0.47339	6.0979
8	3	0.00074627	-0.38418	1.8671
8	3	0.00037313	-4.5651	11.611
8	3	0.00073665	3.8778	9.3323
8	3	0.00073394	-2.3335	5.488
8	3	0.00073665	4.6278	6.2195
8	3	0.0014842	-8.4298	7.9349
8	3	0.00037523	-0.65357	19.503
8	3	0.0011299	1.9018	5.294
8	3	0.001145	1.0247	10.229
8	3	0.00077973	0.61365	9.2766
8	3	0.00039604	16.378	18.191
8	3	0.0004008	2.1279	29.735
8	3	0.00080645	-9.797	16.427
8	3	0.0020325	3.4218	13.062
8	3	0.0004085	-1.9639	12.574
8	3	0.00041667	11.134	9.3816
8	3	0.00081967	0.097392	16.573
8	3	0.0010274	-0.80467	6.9291
8	3	0.0007177	4.0963	12.158
8	3	0.0014493	5.0698	9.8852
8	3	0.0025144	13.656	9.4571
8	3	0.0017815	-1.3223	14.022
8	3	0.0014374	7.5187	17.381
8	3	0.00077519	-3.6021	5.235
8	3	0.0026266	3.5878	16.05
8	3	0.002214	-7.6888	8.5073
8	3	0.0021818	-9.5673	5.965
8	3	0.0014545	9.8123	1.649
8	3	0.00073529	15.039	9.6725
8	3	0.0018484	-1.2691	20.641
8	3	0.0025783	15.028	13.956
8	3	0.001845	4.941	10.539
8	3	0.0026119	4.1406	8.2627
8	3	0.0011321	-10.003	14.19
8	3	0.003071	2.8348	16.381
8	3	0.0023301	1.9305	12.166
8	3	0.0022346	4.4194	18.8
8	3	0.0026168	5.6318	20.273
8	3	0.0022388	-6.44	7.5989
8	3	0.0014925	2.6103	9.2059
8	3	0.0033149	-1.2941	13.595
8	3	0.0025688	-4.5991	2.4299
8	3	0.0022099	-5.4404	8.2465
8	3	0.0022263	-6.8329	8.2672
8	3	0.003352	3.208	13.739
8	3	0.0015009	-9.0458	19.022
8	3	0.0030132	0.2181	13.099
8	3	0.0019084	7.658	10.769
8	3	0.0023392	14.117	16.207
8	3	0.0019802	13.672	6.5108
8	3	0.0024048	16.611	11.637
8	3	0.0012097	7.9632	22.874
8	3	0.002439	12.713	22.53
8	3	0.0028595	0.12645	12.682
8	3	0.0029046	1.1425	13.985
8	3	0.0029167	7.2226	13.456
8	3	0.0029167	0.96858	15.538
8	3	0.0020492	-0.94991	16.485
8	3	0.00036232	-0.44185	10.127
8	3	0.0010776	2.3483	14.316
8	3	0.0010689	8.0286	8.5115
8	3	0.0003876	18.419	13.377
8	3	0.0011257	4.2584	8.7136
8	3	0.001107	4.6793	14.419
8	3	0.00072727	6.575	9.3074
8	3	0.00036364	1.955	9.792
8	3	0.0029575	17.397	6.4011
8	3	0.00036832	13.814	8.419
8	3	0.001476	-1.6849	14.418
8	3	0.00037313	3.0712	14.987
8	3	0.0011516	3.1989	5.6331
8	3	0.00038835	-9.0914	20.194
8	3	0.00039139	1.0077	14.228
8	3	0.00040323	-3.6996	14.541
8	3	0.0014925	-3.6548	14.62
8	3	0.00036832	-5.9101	11.29
8	3	0.00073394	-2.2512	5.859
8	3	0.0015009	-2.7757	6.6868
8	3	0.0011696	3.7611	21.027
8	3	0.0012024	15.462	16.763
8	3	0.00080645	2.5227	10.258
8	3	0.00125	11.908	14.468
8	3	0.00040984	-1.0194	24.294
8	3	0.00038388	10.563	10.022
9	2	0.00081522	1.9624	7.3241
9	2	0.00060423	4.9414	9.0313
9	2	0.0009324	6.0031	16.369
9	2	0.00043384	-1.0846	7.0946
9	2	0.00042553	-4.8	4.8628
9	2	0.000409	-7.2757	8.5564
9	2	0.00039683	5.3306	10.755
9	2	0.00041494	-6.5311	3.4408
9	2	0.00084034	-6.845	8.7907
9	2	0.00045767	-4.1856	7.5329
9	2	0.00050761	4.5791	7.8765
9	2	0.00059524	-0.51643	4.5156
9	2	0.0009434	-1.6248	8.9431
9	2	0.00071023	-1.8941	5.2772
9	2	0.00067265	1.2439	1.5496
9	2	0.0012545	0.2217	5.0623
9	2	0.0036254	-1.2816	7.2008
9	2	0.0021563	-6.0363	6.8575
9	2	0.0009901	3.746	6.4023
9	2	0.0009324	4.5494	9.7393
9	2	0.0013483	-1.8626	5.123
9	2	0.0034707	-0.11936	6.7044
9	2	0.0037815	-0.17613	10.582
9	2	0.0012605	-4.0859	9.2607
9	2	0.0021277	-3.4078	2.5475
9	2	0.00042918	2.9881	7.1634
9	2	0.0013158	-2.303	5.6375
9	2	0.0013187	-4.2978	6.0719
9	2	0.0012121	-5.6457	10.274
9	2	0.00040323	0.65455	2.4559
9	2	0.0028112	-0.8754	4.3911
9	2	0.0015873	0.20063	3.1087
9	2	0.0015686	8.3792	11.718
9	2	0.00039841	4.1992	3.5667
9	2	0.001626	6.2314	10.354
9	2	0.00082474	4.8728	10.95
9	2	0.0016563	2.4015	9.4623
9	2	0.0020747	-2.0808	5.772
9	2	0.0033613	-6.8703	6.7208
9	2	0.00086768	-6.3834	8.5483
9	2	0.0019231	-1.3501	9.6511
9	2	0.0020305	-0.88951	5.9204
9	2	0.001087	-3.4019	7.6153
9	2	0.0011905	2.5759	6.934
9	2	0.0013158	2.5498	5.9424
9	2	0.00070281	-1.275	9.4071
9	2	0.00074627	-1.9041	12.268
9	2	0.0023437	13.014	11.314
9	2	0.00082645	5.3589	6.4524
9	2	0.00089286	5.5652	7.458
9	2	0.0028302	7.6739	16.156
9	2	0.0016304	-0.19595	6.9279
9	2	0.0015267	-4.8869	5.6389
9	2	0.00071023	2.3471	8.4135
9	2	0.0020179	-4.123	4.1685
9	2	0.0012545	-2.2538	6.4847
9	2	0.0018127	6.5302	11.968
9	2	0.0016173	-1.4578	6.8987
9	2	0.0024752	-5.8425	1.1215
9	2	0.002331	-4.4011	6.905
9	2	0.00044944	-1.8823	11.03
9	2	0.00086768	-0.83011	6.4361
9	2	0.0016807	3.6613	7.7431
9	2	0.00042017	-0.87148	4.0543
9	2	0.0017021	1.8944	7.7285
9	2	0.0012876	-2.5063	3.8779
9	2	0.0004386	-2.0835	7.7791
9	2	0.0026374	2.0295	9.3076
9	2	0.0030369	-2.3463	5.1765
9	2	0.0017505	3.748	10.295
9	2	0.00040161	-8.532	4.4882
9	2	0.0031746	-0.88243	10.78
9	2	0.0035294	6.1903	16.827
9	2	0.0023904	-0.4897	7.6762
9	2	0.00081301	-1.277	2.6813
9	2	0.0012371	0.85985	10.014
9	2	0.0012422	5.7086	10.035
9	2	0.0012448	8.1927	10.495
9	2	0.0012605	3.7938	8.9506
9	2	0.0017354	-2.1323	9.3243
9	2	0.0018307	-2.9663	10.394
9	2	0.00096154	-7.3983	8.7828
9	2	0.0015228	-5.9888	8.0777
9	2	0.001087	-5.7663	9.6309
9	2	0.0029762	-3.2216	6.0122
9	2	0.0039474	1.108	7.7533
9	2	0.0022388	-0.64176	4.3836
9	2	0.00082645	-0.99965	5.3028
9	2	0.0009434	10.43	6.434
9	2	0.00076336	-9.0968	12.899
9	2	0.00062724	-3.122	11.925
9	2	0.00060423	-4.9454	13.907
9	2	0.00086768	-6.7289	9.809
9	2	0.00042553	2.9125	6.7229
9	2	0.00085837	3.7804	4.3223
9	2	0.00043956	-1.7048	3.127
9	2	0.00043384	-5.543	4.5041
9	2	0.00081301	-0.63431	11.273
9	2	0.00041494	7.7696	9.2973
9	2	0.00084034	7.8543	6.4716
9	2	0.00086768	3.117	4.9814
9	2	0.00045767	4.0497	4.047
9	2	0.00078125	5.856	11.384
9	3	0.00045558	-3.6056	5.2057
9	3	0.0035088	10.798	5.6922
9	3	0.00046083	-3.3401	23.252
9	3	0.00042827	6.3964	6.5817
9	3	0.001636	1.86	6.7479
9	3	0.0015905	7.5595	22.373
9	3	0.00078585	6.5073	19.79
9	3	0.0003937	3.9555	8.8296
9	3	0.00080645	-2.7421	10.838
9	3	0.0015504	6.044	11.871
9	3	0.00076775	-4.9184	8.7131
9	3	0.00037879	0.47339	6.0979
9	3	0.0022388	-0.38418	1.8671
9	3	0.00074766	-4.5651	11.611
9	3	0.0011429	3.8778	9.3323
9	3	0.00079051	-2.3335	5.488
9	3	0.00041322	4.6278	6.2195
9	3	0.00086207	-8.4298	7.9349
9	3	0.0013667	6.0165	17.051
9	3	0.00098765	-0.65357	19.503
9	3	0.00054795	1.9018	5.294
9	3	0.0012121	1.0247	10.229
9	3	0.0028777	16.378	18.191
9	3	0.0031746	2.1279	29.735
9	3	0.00084541	-9.797	16.427
9	3	0.00093985	-1.9639	12.574
9	3	0.00096154	0.050937	7.0902
9	3	0.00097403	-3.3555	14.81
9	3	0.0017606	13.656	9.4571
9	3	0.0031414	-1.3223	14.022
9	3	0.0029412	-3.6021	5.235
9	3	0.0025478	3.5878	16.05
9	3	0.0011236	-7.6888	8.5073
9	3	0.0030075	-9.5673	5.965
9	3	0.002765	9.8123	1.649
9	3	0.00088496	15.039	9.6725
9	3	0.0017131	-1.2691	20.641
9	3	0.002454	15.028	13.956
9	3	0.0015905	4.941	10.539
9	3	0.0027505	4.1406	8.2627
9	3	0.0015748	-10.003	14.19
9	3	0.0012097	2.8348	16.381
9	3	0.00040733	1.9305	12.166
9	3	0.0015355	4.4194	18.8
9	3	0.0018939	5.6318	20.273
9	3	0.0033582	-6.44	7.5989
9	3	0.0018692	2.6103	9.2059
9	3	0.0026667	-1.2941	13.595
9	3	0.00039526	-4.5991	2.4299
9	3	0.0020661	-5.4404	8.2465
9	3	0.0034483	-6.8329	8.2672
9	3	0.0022779	3.208	13.739
9	3	0.0024691	-9.0458	19.022
9	3	0.00054795	0.2181	13.099
9	3	0.0019934	14.117	16.207
9	3	0.00079365	16.611	11.637
9	3	0.0016908	7.9632	22.874
9	3	0.0028846	1.1425	13.985
9	3	0.00097403	7.2226	13.456
9	3	0.0010101	-0.44185	10.127
9	3	0.0017606	2.3483	14.316
9	3	0.0031414	8.0286	8.5115
9	3	0.00074468	2.8927	11.822
9	3	0.00073529	18.419	13.377
9	3	0.0012739	4.2584	8.7136
9	3	0.0005618	4.6793	14.419
9	3	0.0010025	6.575	9.3074
9	3	0.0013825	1.955	9.792
9	3	0.00044248	-8.5916	11.749
9	3	0.00085653	17.397	6.4011
9	3	0.000409	13.814	8.419
9	3	0.0011928	-1.6849	14.418
9	3	0.00039293	3.0712	14.987
9	3	0.0023622	7.3661	6.4571
9	3	0.0012097	3.1989	5.6331
9	3	0.00081466	-9.0914	20.194
9	3	0.000818	1.0077	14.228
9	3	0.00041408	-3.6996	14.541
9	3	0.0011429	-5.9101	11.29
9	3	0.0011858	-2.2512	5.859
9	3	0.00041322	1.1373	17.994
9	3	0.00086207	-9.0904	12.894
9	3	0.00049383	-2.7757	6.6868
9	3	0.00054795	2.2024	2.8941
9	3	0.0012121	-2.8443	20.274
9	3	0.0013289	3.7611	21.027
9	3	0.00079365	15.462	16.763
9	3	0.00084541	2.5227	10.258
9	3	0.0017857	22.297	13.58
9	3	0.0019231	11.98	16.76
9	3	0.00050125	10.616	6.444
9	3	0.00041408	-9.5918	17.611
9	3	0.0004158	-3.9119	21.098
9	3	0.00084541	12.696	9.5258
