# Supplementary material for: How human runners regulate footsteps on uneven terrain
Source: eLife journal article supplement (doi:10.7554/elife.67177), 2023-02-22
Supplement: supp [file elife-67177-supp-v1.zip › elife_poa_e67177_Table_2_source_data_1.csv]

subject	terrain_type	SD_CoM_forward_speed_m_per_s	mean_CoM_forward_speed_m_per_s	mean_touchdown_leg_angle	SD_touchdown_leg_angle	median_step_width	inter_quartile_range_step_width	mean_step_length	SD_step_length	median_meander	inter_quartile_range_meander	SD_leg_length_touch_down	mean_leg_length_touch_down	mean_foot_speed	SD_foot_speed	metabolic_power_W_per_kg	mean_fore_aft_impulse	SD_fore_aft_impulse
1	1	0.11534	3.3717	0.20601	0.018174	0.014958	0.015508	1.2394	0.056123	0.00078434	0	0.0065256	1.0725	0.63571	0.14654	12.8792156	0.93341	0.015561
1	2	0.18929	3.2701	0.2036	0.019852	0.013187	0.017473	1.1678	0.16166	0.0018873	0.00095788	0.0089169	1.0532	0.46656	0.11554	13.2192636	0.92979	0.046491
1	3	0.12936	3.3907	0.1973	0.019808	0.014278	0.016171	1.2386	0.06455	0.00080453	8.36E-05	0.010889	1.0571	0.48675	0.11568	13.2871729	0.94184	0.0085962
2	1	0.10032	3.1365	0.2442	0.029735	0.04424	0.04294	1.5598	0.05337	0.00045414	5.54E-05	0.0078021	1.0747	0.33121	0.24428	12.8800505	0.93552	0.008728
2	2	0.057695	3.2249	0.24319	0.017882	0.039977	0.026543	1.6092	0.033814	0.0004902	8.73E-05	0.0064836	1.0738	0.30125	0.11264	14.3761867	0.93428	0.012845
2	3	0.076091	3.1164	0.25123	0.029362	0.050407	0.039972	1.5495	0.053014	0.00058116	0.00012695	0.0074025	1.0574	0.41389	0.32955	12.7846971	0.93592	0.0115
3	1	0.16553	3.2508	0.19706	0.023449	0.02111	0.019264	1.3945	0.077152	0.00025375	7.82E-05	0.0095491	1.0649	0.50798	0.1194	13.3318483	0.94761	0.011187
3	2	0.10908	3.1531	0.19284	0.03023	0.020343	0.021407	1.3529	0.040798	0.00039257	0.00034559	0.004678	1.1019	0.34328	0.1619	12.0945992	0.93814	0.0098668
3	3	0.15639	3.1948	0.22436	0.026851	0.02002	0.0224	1.4057	0.053975	0.00080313	0.0009177	0.005473	1.0542	0.47777	0.12185	13.8889284	0.94118	0.013234
4	1	0.081531	3.2154	0.18824	0.013683	0.01623	0.019254	1.3193	0.044515	0.00028284	0.00010363	0.0052612	1.0899	0.52175	0.13991	12.0601689	0.94059	0.01161
4	2	0.15786	3.173	0.19017	0.021113	0.01525	0.019011	1.3304	0.066873	0.00027725	0.00012376	0.0069059	1.0823	0.36758	0.10457	11.8651707	0.93256	0.0095245
4	3	0.13345	3.1823	0.18655	0.022012	0.018772	0.024787	1.3464	0.052402	0.00036105	0.00012727	0.0068297	1.0818	0.39283	0.1406	11.4006073	0.93536	0.010866
5	1	0.084781	3.2483	0.20181	0.02539	0.016106	0.020996	1.1844	0.05193	0.00029491	6.69E-05	0.0065661	1.0605	0.22595	0.14957	12.2011269	0.94479	0.007514
5	2	0.15068	3.2535	0.19575	0.019724	0.016967	0.021263	1.1639	0.068279	0.00033138	0.00010029	0.0075527	1.0508	0.16941	0.19564	13.4929733	0.9463	0.0096145
5	3	0.084516	3.1822	0.19159	0.035307	0.01696	0.020318	1.1315	0.048999	0.0002824	6.57E-05	0.0047827	1.047	0.15168	0.15985	13.4292942	0.94856	0.011535
6	1	0.11573	3.2536	0.17033	0.018588	0.012971	0.012803	1.1544	0.069357	0.00034739	8.82E-05	0.0070086	1.0865	0.43932	0.22088	11.7036012	0.94184	0.0066023
6	2	0.14586	3.2448	0.18064	0.018018	0.018891	0.021	1.0997	0.058693	0.00047997	0.00015548	0.0056523	1.0746	0.27585	0.10636	12.9972787	0.94802	0.0051908
6	3	0.13986	3.1416	0.19604	0.031001	0.017183	0.022979	1.0626	0.060851	0.00070015	0.00016119	0.0079816	1.0681	0.20798	0.168	13.09951	0.9478	0.010236
7	1	0.10304	3.1878	0.21922	0.018325	0.031805	0.021935	1.2975	0.066392	0.00026313	6.69E-05	0.005441	1.1058	0.6578	0.13436	12.6586525	0.94348	0.0078243
7	2	0.14081	3.298	0.22233	0.023322	0.0312	0.030751	1.3685	0.062458	0.00027145	0.00020437	0.0073824	1.096	0.42609	0.12032	12.8416593	0.92984	0.01455
7	3	0.12047	3.1781	0.23754	0.026393	0.035254	0.033377	1.2998	0.062367	0.0001815	9.14E-05	0.011121	1.0912	0.39698	0.12445	13.5598946	0.94025	0.013971
8	1	0.097228	3.2874	0.20511	0.014785	0.010796	0.013154	1.143	0.054347	0.00032063	4.62E-05	0.013821	1.0531	0.81041	0.25807	11.4811239	0.94497	0.0092445
8	2	0.10225	3.1779	0.20241	0.024163	0.013463	0.016698	1.104	0.050266	0.00039713	9.59E-05	0.013161	1.0076	0.44144	0.26107	12.3267806	0.94343	0.0088356
8	3	0.08641	3.0664	0.21156	0.017129	0.016735	0.020326	1.0905	0.040347	0.00048769	0.00018353	0.011972	1.0224	0.39713	0.21105	12.2943613	0.93802	0.0086974
9	1	0.12089	3.1903	0.20983	0.064204	0.011037	0.014683	1.2699	0.071952	0.0003309	0.00011459	0.022328	1.0687	0.65066	0.17476	11.9552921	0.92972	0.011065
9	2	0.14725	3.0837	0.18972	0.020062	0.017923	0.021862	1.2461	0.070092	0.00043913	0.00013263	0.0081021	1.0649	0.49862	0.12181	12.615017	0.92689	0.0091609
9	3	0.12842	3.1538	0.22802	0.097173	0.026926	0.02885	1.2425	0.071989	0.00043542	0.00015629	0.039017	1.0543	0.50274	0.24361	12.7861881	0.93016	0.013492
